# Supplementary material for: Missing from the debate? A qualitative study exploring the role of communities within interventions to address female genital mutilation in Europe
Source: PubMed Central journal article supplement — BMJ Open. 2018 Jun 30;8(6):e021430. doi: 10.1136/bmjopen-2017-021430 (PMC6042612; doi:10.1136/bmjopen-2017-021430), 2018-06-30
Supplement: bmjopen-2017-021430.draft_revisions.pdf [file bmjopen-2017-021430.draft_revisions.pdf]

# BMJ Open

BMJ Open is committed to open peer review. As part of this commitment we make the peer review history of every article we publish publicly available.

When an article is published we post the peer reviewers' comments and the authors' responses online. We also post the versions of the paper that were used during peer review. These are the versions that the peer review comments apply to.

The versions of the paper that follow are the versions that were submitted during the peer review process. They are not the versions of record or the final published versions. They should not be cited or distributed as the published version of this manuscript.

BMJ Open is an open access journal and the full, final, typeset and author-corrected version of record of the manuscript is available on our site with no access controls, subscription charges or pay-per-view fees (<http://bmjopen.bmj.com>).

If you have any questions on BMJ Open's open peer review process please email [info.bmjopen@bmj.com](mailto:info.bmjopen@bmj.com)

# BMJ Open

## Missing from the debate? A qualitative study exploring the role of communities within interventions to address female genital mutilation in Europe

|                               |                                                                                                                                                                                                                                  |
|-------------------------------|----------------------------------------------------------------------------------------------------------------------------------------------------------------------------------------------------------------------------------|
| Journal:                      | <i>BMJ Open</i>                                                                                                                                                                                                                  |
| Manuscript ID                 | bmjopen-2017-021430                                                                                                                                                                                                              |
| Article Type:                 | Research                                                                                                                                                                                                                         |
| Date Submitted by the Author: | 28-Dec-2017                                                                                                                                                                                                                      |
| Complete List of Authors:     | Connelly, Elaine; Scottish Refugee Council<br>Murray, Nina; European Network on Statelessness<br>Baillot, Helen; Scottish Refugee Council<br>Howard, Natasha; London School of Hygiene & Trop Med, Global Health and Development |
| Keywords:                     | Violence against women, Female genital mutilation, Europe                                                                                                                                                                        |
|                               |                                                                                                                                                                                                                                  |

SCHOLARONE™  
Manuscripts

Peer Review Only

1  
2  
3 **Missing from the debate? A qualitative study exploring the role of communities within**  
4 **interventions to address female genital mutilation in Europe**  
5

6  
7 Elaine Connelly<sup>1</sup>, Nina Murray<sup>1,2</sup>, Helen Baillot<sup>1</sup>, Natasha Howard<sup>3§</sup>  
8  
9

10 §Corresponding author  
11

12  
13 <sup>1</sup> Scottish Refugee Council, Portland House, 17 Renfield St, Glasgow G2 5AH

14 <sup>2</sup> European Network on Statelessness, Berol House, 25 Ashley Road, London N17 9LJ

15 <sup>3</sup> London School of Hygiene and Tropical Medicine, Department of Global Health and  
16 Development, 15-17 Tavistock Place, London WC1H 9SH  
17  
18

19  
20 EC: [econnelly@mail.com](mailto:econnelly@mail.com)

21 NM: [nina@ninamurray.uk](mailto:nina@ninamurray.uk)

22 HB: [helenmbaillot@gmail.com](mailto:helenmbaillot@gmail.com)

23 NH: [natasha.howard@lshtm.ac.uk](mailto:natasha.howard@lshtm.ac.uk)  
24  
25  
26  
27

28 **Key words**

29 FGM, female genital cutting, community development, Europe  
30  
31  
32  
33  
34  
35  
36  
37  
38  
39  
40  
41  
42  
43  
44  
45  
46  
47  
48  
49  
50  
51  
52  
53  
54  
55  
56  
57  
58  
59  
60

## **Abstract**

### *Introduction*

Public attention on female genital mutilation in diaspora communities is increasing in Europe, as health and social welfare implications become better understood. This study explored the role of potentially-affected communities within interventions to address female genital mutilation in Europe.

### *Methods*

A qualitative study design incorporated 18 individual key informant interviews and five semi-structured group interviews with policy-makers, service providers, and community representatives. Data were analysed thematically, guided by the Scottish Government '4Ps' framework for addressing violence against women and girls (i.e. prevention, protection, participation, provision of services).

### *Results*

Participants emphasised both the importance of community participation and the lack of consistent engagement by policy-makers and practitioners. All indicated that communities had a key role, though many interventions focussed on awareness-raising rather than community empowerment, behaviour change, or influence on the design, delivery, and/or evaluation of interventions.

### *Conclusions*

Despite clear consensus around the need to engage, support, and empower potentially-affected communities and several examples of meaningful community participation in addressing female genital mutilation, the role of communities remains inconsistent and further engagement efforts are necessary.

### **Strengths and limitations**

- This study was exploratory and participant numbers were limited, including members of potentially-affected communities, due to time and resource constraints.
- Study focus was on European interventions, thus excluding many innovative and successful African interventions.
- Nevertheless, this study is a rare effort to examine the under-researched role of diaspora communities in initiatives to address female genital mutilation in Europe, drawing from in-depth and semi-structured key informant interviews.

## Introduction

Female genital mutilation (FGM), a practice (defined in Table 1) that expresses '*deeply entrenched gender inequalities, grounded in a mix of cultural, religious and social facts inherent within patriarchal families and communities,*' is recognised internationally as a violation of the fundamental rights of women and girls and a serious form of gender-based violence (EIGE, 2013). Health implications of FGM are wide-ranging and well-established. Immediate health consequences include shock, haemorrhage, infection, and psychological trauma, while long-term risks include chronic pain, infections, cheloids, primary infertility, urogenital complications, birth complications, and danger to newborns (Kaplan et al, 2011). Though sometimes referred to as 'cutting' or 'female circumcision', this article uses 'FGM' to acknowledge the harm to women and communities.

Data indicate the existence of large communities potentially-affected by FGM in many European countries (Leye et al, 2014; EIGE, 2013). For example, 23,979 people born in one of 29 'FGM-practising countries' (Unicef, 2013), were living in Scotland in 2011 (Baillot et al, 2014). However, attempts to estimate numbers of women and girls who have undergone or are at risk of FGM in diaspora communities in Europe have proven difficult due to data limitations and lack of agreement on prevalence estimation methods (Leye et al, 2014). Additionally, the extent to which migration experiences may change attitudes and practices remains under-researched (Gele et al, 2012). This article uses the term 'potentially-affected communities' to avoid presumptions attached to 'FGM practising communities' that may be inaccurate in a migratory context (Hemmings, 2011).

The concept of community is not straightforward, with a range of contradictory and related meanings used on all sides of the political spectrum (Shaw, 2013). Often defined by geography, interest, or identity, communities are not homogenous or static but rather diverse, dynamic, and multifaceted entities (CDNOS, 2015). This article primarily describes communities of identity, where the common bond is often nationality, ethnicity, and the experience of exile, although some may also be issue-based or geographical.

FGM is described as a '*tradition in transition*' (Berg & Denison, 2013), with some experts asserting that empowering affected communities will lead to its elimination (Gele et al, 2012; Isman et al, 2013; Costello et al, 2013). Public, media, and political attention on FGM in diaspora communities within Europe has increased, but often focuses on criminal justice and child protection (Dustin, 2010). While many European countries have enacted legislation and policy initiatives, the role of communities in interventions addressing FGM remains limited (Dustin, 2010; EIGE, 2013). Little research has been conducted on the role of communities in

1  
2  
3 FGM interventions and very few have been rigorously evaluated (Brown et al, 2013). Thus,  
4 community voices are generally missing from FGM policy debates and partnerships, despite  
5 growing consensus that communities are key in addressing FGM (Norman et al, 2009).  
6 Working with potentially-affected communities may provide a key opportunity, as the process  
7 of migration and exile allows communities to reflect, question, and debate traditional beliefs  
8 (Johansen, 2006).  
9  
10  
11

12  
13 This study aimed to explore the role of communities within interventions to address FGM in  
14 Europe, describing perspectives of practitioners, activists, and community representatives on  
15 current practices and promising interventions. It is relevant to policy-makers, researchers,  
16 community development practitioners, and professionals working with potentially-affected  
17 communities.  
18  
19  
20  
21

## 22 **Methods**

### 23 *Study design*

24 A qualitative study design was selected, drawing on data from a scoping literature review  
25 (Baillot et al, unpublished) and interviews (i.e. individual and group) with Europe-based  
26 academics, legal professionals, statutory and voluntary service providers, community  
27 activists, and representatives from potentially-affected communities. The research question  
28 was "*What is the role of potentially-affected diaspora communities in interventions that*  
29 *respond to and challenge FGM in Europe?*" Table 1 provides definitions used.  
30  
31  
32  
33  
34

### 35 *Data collection*

36 *In-depth key-informant interviews* were conducted by EC and HB. Participants were recruited  
37 purposively to include academics, policy-makers, police officers, NGO staff, and community  
38 activists in EEA member countries with recognised FGM responses. Of 27 invitees, 18  
39 participated. Interviews lasted approximately 60 minutes, were audio recorded or scribed  
40 depending on permission, and conducted in locations of participants' choosing.  
41  
42  
43  
44

45 *Semi-structured group interviews* were facilitated by EC and NM. Participants were recruited  
46 purposively to include senior and mid-level policy-makers, statutory and voluntary service  
47 providers, and community representatives selected for their FGM expertise and activism. Of  
48 59 invitees, 36 participated. Discussions lasted approximately 1.5 hours, included 4-9  
49 participants, were either audio-recorded or scribed, and facilitated in a central Glasgow  
50 venue.  
51  
52  
53  
54

### 55 *Analysis and reporting*

1  
2  
3 Data were analysed thematically. The Scottish Government's strategic approach to  
4 preventing and eradicating violence against women and girls '4Ps' framework (i.e.  
5 participation, prevention, protection, provision of services) was used for initial deductive  
6 coding. Additional themes emerged using inductive coding. EC and NM coded data using  
7 *Dedoose* software, with checks by HB. Discrepancies were resolved through discussion and  
8 agreement among all authors. Reporting adhered to COREQ criteria for qualitative research  
9 (Tong *et al*, 2007).  
10  
11  
12

### 13 14 *Ethics*

15 The Research Ethics Committee of the London School of Hygiene & Tropical Medicine  
16 granted ethics approval (reference 7977).  
17  
18  
19

### 20 **Findings**

21 Table 2 shows 18 individual interviews were conducted with participants working EU-wide  
22 and/or in seven countries with active interventions addressing FGM (i.e. Belgium, England,  
23 France, Ireland, Netherlands, Scotland, Spain). Five group interviews were conducted with a  
24 total of 36 policy-makers, service providers, and community representatives. Community  
25 participants, from Sudan, Somalia, Gambia, and Uganda, were activists or representatives of  
26 voluntary or community-led organisations working to address FGM.  
27  
28  
29  
30

31  
32 The role of communities is reported under the four framework themes and one emergent  
33 theme of barriers to involvement. Sub-sections include analysis of the extent to which  
34 potentially-affected communities were involved in addressing FGM in Europe.  
35  
36  
37

### 38 *Participation*

39 Four participation sub-themes emerged: (i) communities' vital role, (ii) engagement and  
40 representativeness, (iii) involvement in campaigns, and (iv) the value of a clear and inclusive  
41 national strategy.  
42  
43  
44

45  
46 *Vital role:* Literature and interview sources highlighted that empowering affected communities  
47 was the only way to end FGM (Costello *et al*, 2013; Gele *et al*, 2012; Isman *et al*, 2013;  
48 Khaja *et al*, 2009). All participants emphasised the key role of potentially-affected  
49 communities, indicating it was vital to ensure interventions were informed by the  
50 experiences, needs and views of those affected by FGM.  
51  
52

53 *'Anything around FGM needs to be championed and developed with people affected at*  
54 *the centre and leading the work.'* (CG1)  
55  
56  
57  
58

1  
2  
3 Supporting and enabling community organisations to participate in policy-making was  
4 identified as essential.

5 *'Finding ways and mechanisms to give [community organisations] that capacity, the*  
6 *framework and leverage for them to be heard [is] very important because I don't*  
7 *believe we can effectively abandon FGM in Europe [...] if those communities are not*  
8 *the ones...acting for the abandonment of FGM. It's a very important role and only they*  
9 *can actually do it.'* (KIF10)

13  
14 *Engagement and representativeness:* Despite consensus on its value, most participants said  
15 insufficient efforts were made by policy-makers and practitioners to engage with communities  
16 (KIF06; KIF01; KIF07; KIF17; KIF18). This was particularly evident in the UK, with existing  
17 approaches described as *'piecemeal'* (KIF15) and *'tokenistic'* (KIF17; KIF18). Community  
18 participants cited examples of being excluded or included at the last minute to *'tick a box'*  
19 (KIF17) or when statutory professionals had a crisis (KIF18). In contrast, engagement in the  
20 Netherlands was described as *'active'* (KIF05; KIF18).

21  
22 *'I don't think there's any such thing as a hard-to-reach group. I think there's*  
23 *something called 'failed-to-reach groups by the statutory agencies' because there'll*  
24 *always be individuals or an organisation who'll get you access to affected*  
25 *communities.'* (KIM12)

26  
27  
28  
29  
30  
31  
32 Participants noted a tendency of UK decision-makers to engage with the same handful of  
33 individuals as *'leaders'* or *'spokespeople'* (KIF18). One highlighted the difference between  
34 enabling individual community members to participate and working with community  
35 organisations.

36  
37 *"[Community organisations] are bringing more than just their personal opinion, they*  
38 *tend... to be engaging more widely with the community and so can be a channel to*  
39 *have these voices heard."* (KIF18)

40  
41  
42  
43  
44 Representativeness appeared to be a particular challenge for countries newer to FGM issues  
45 (e.g. Portugal) as community organisations might not yet exist around this issue or have  
46 confidence and advocacy experience (KIF18). Thus, whether effective or *'active'* participation  
47 was achieved appeared to vary between - and sometimes within - countries, potentially  
48 depending on whether decision-makers valued community organisations.

49  
50 *"It depends... whether the local authority [...] values community interventions and*  
51 *whether they see the community as a problem and... statutory professionals as the*  
52 *answer...or whether [the local authority] views the community as part and parcel of*  
53 *[...] the solution."* (KIF18)

1  
2  
3  
4 UK participants noted that most FGM work occurred in silos, further challenging effective  
5 participation. Interventions focused solely on FGM failed to account for '*gendered social*  
6 *norms... and nature of women's lives*' (KIF15). Participants indicated that separating FGM  
7 from issues like domestic violence was a major problem.  
8  
9

10 *"They are seen as completely separate topics or discrete topics as opposed to how*  
11 *do these principles cut across the way we navigate our communities and navigate our*  
12 *spaces."* (KIF18)  
13  
14  
15

16 *Campaigns:* Several participants said that communities played an important role in  
17 campaigning and awareness-raising. The Europe-wide End FGM Campaign led by Amnesty  
18 International Ireland and the lobbying work of GAMS, a large French NGO founded in 1982  
19 by women of African and Western origin, were highlighted (KIF02). Others spoke of the  
20 important work of high profile survivor-campaigners, such as Layla Hussein in the UK  
21 (KIF07). One participant talked about her own role as a community campaigner in '*raising*  
22 *awareness through fashion...music and culture nights*' and '*campaigning, lobbying and*  
23 *working with the government*' (KIF07).  
24  
25  
26  
27  
28

29 *Strategy:* Several participants noted that addressing FGM required strong strategic  
30 frameworks. Most suggested this should be a resourced, standalone, multi-agency, national  
31 action plan, developed in partnership with key stakeholders, including affected communities:  
32  
33

34 *"Authorities should... design a plan of action on FGM and...attach a budget to it and [it]*  
35 *should not only be developed by officials in their offices but in collaboration with the*  
36 *communities themselves and with all stakeholders."* (KIF06)  
37  
38  
39

40 At least eight European countries had developed national FGM action plans by 2013 (EIGE,  
41 2013) and Scotland did so in 2016 (Scottish Government, 2016). There were very few  
42 examples across Europe of communities having a role in strategy development or being  
43 supported to influence policy and practice. The Finnish National Action Plan provided an  
44 example of community engagement, as it was developed by a working group of government  
45 ministries and African women's organisations (EIGE, 2013). Scotland's national action plan  
46 incorporated clear actions on community participation, but participants noted limited  
47 engagement with communities in its development (KIF17) and a general absence of  
48 community voices in the policy arena in Scotland (CG1; CG2; KIF17). Participants in several  
49 European countries noted disconnects between policy and reality.  
50  
51  
52  
53  
54  
55  
56  
57  
58  
59  
60

1  
2  
3 *“One thing we’re missing which is the reality for many European countries, is the*  
4 *grassroots... There’s a lot of awareness and there’s a lot of policy but somehow we don’t*  
5 *understand what’s happening at the grass roots.” (KIF07)*  
6  
7

### 8 *Prevention*

9  
10 Prevention sub-themes that emerged were: (i) women’s leadership; (ii) roles of men, youth,  
11 and religious leaders; and (iii) effective prevention interventions.  
12

13  
14 *Women’s leadership:* Participants identified women from potentially-affected communities,  
15 including survivors, as playing key roles in addressing FGM. Provided they had the trust and  
16 respect of their communities, these ‘*knowledgeable cultural guides*’ (Khaja et al, 2009) were  
17 considered central to changing community behaviours. A participant explained that while ‘*it*  
18 *doesn’t need to be a survivor...you do need someone from that community*’ (KIF07). Norman  
19 and colleagues noted the effectiveness of messages from within communities:  
20

21  
22 *‘Women’s arguments against FGM, spoken fluently and in their own words and*  
23 *crucially, coming from within the community, provide an important resource for those*  
24 *working to end FGM.’ (Norman et al, 2009)*  
25  
26  
27  
28

29 A UK participant highlighted the significance of a women-led ‘*African diaspora organisation*’  
30 addressing FGM:  
31

32 *“People recognize that we seem to have some kind of understanding of the issues...  
33 We...brought a woman from Somalia to deliver a session on social services and  
34 safeguarding children. It was a different dynamic... because this is somebody from the  
35 community talking about these issues.” (KIF15)*  
36  
37  
38

39  
40 *Roles of men, youth, and religious leaders:* While women from affected communities have  
41 been vital in prevention interventions, participants identified the important male role that was  
42 often missing.  
43

44 *‘Something that’s really missing is when we talk about the community, we always*  
45 *target women, but what about the men, are they not part of the decision-making?*  
46 *FGM is not only the woman’s decision.’ (KIF07)*  
47  
48  
49

50 Male perspectives provided deeper reflection about cultural complexities surrounding FGM  
51 and the most common arguments for its continuation (Ruiz et al, 2014). One participant  
52 noted that men were increasingly involved and no longer viewed FGM as strictly ‘*women’s*  
53 *business*’ (KIF02). Another participant noted that men in migratory contexts were far more  
54 likely to be involved than in countries of origin (KIF09). In the Netherlands, involving men was  
55  
56  
57  
58

1  
2  
3 common:

4 *'I never heard it was difficult to involve men and the men I've spoken with are very*  
5 *passionate.'* (KIF05).  
6  
7

8 Participants identified young people as critical *'advocates of change'* (KIF15) and *'parents of*  
9 *the next generation'* (KIF04), able to speak freely about FGM and more likely to become  
10 involved in community activism. One participant noted that young people were most at risk of  
11 FGM and so educating and working with young people was vital if girls were expected *'to*  
12 *come forward and express their fear of having FGM'* (KIF17). Examples of effective work with  
13 British young people included Daughters of Eve, Integrate Bristol, and FORWARD. In Ireland  
14 and the UK, young people were involved in projects including *'using films and resources to*  
15 *support [...] statutory professionals in schools'* (KIF07), and developing poetry, radio  
16 documentaries, films, and music videos to *'encourage that conversation to happen in as*  
17 *many different settings as you can'* (KIF04).  
18  
19  
20  
21  
22  
23

24 Religious leaders influenced many communities and therefore could play a *'pivotal and*  
25 *respected role'* (Khalifa & Brown, 2016). As one participant stated, *'in our community when*  
26 *we are worried about anything we contact our religious leaders'*, suggesting involvement of  
27 religious leaders could be key (KIF17). Most religious leaders were men, potentially easing  
28 work with other men (KIF17). However, another source noted the need *'to critically examine*  
29 *the added benefit'* as preventative work had challenged the religious justifications of FGM  
30 without necessarily involving religious leaders (Khalifa & Brown, 2016).  
31  
32  
33  
34  
35  
36

37 *Effective interventions:* The World Health Organisation (WHO) recommended a shift from  
38 awareness-raising to behaviour change approaches in 2009 (EIGE, 2013). However, despite  
39 some exceptions, prevention interventions focused on awareness-raising rather than  
40 empowerment and targeted behaviour change (EIGE, 2013; Brown et al, 2013). Awareness-  
41 raising approaches often had broad target audiences and aims rather than focusing on  
42 communities most at risk. Thus, *'key targets ...may not be fully reached or engaged'* (EIGE,  
43 2013). Equally, approaches that focused on individual change, without acknowledging  
44 community belief systems, have resulted in slow progress addressing FGM across Europe  
45 (Brown et al, 2013). When community organisations and statutory professionals worked  
46 together on prevention work, using joint messages on ending FGM, FGM rejection reportedly  
47 increased (Brown et al, 2016, Khalifa & Brown, 2016; Esmee Fairbairn, 2013).  
48  
49  
50  
51  
52  
53

54 Participants identified EU-funded REPLACE and REPLACE2 programmes as effective  
55 prevention interventions, focused on Belgium, England, Italy, the Netherlands, Portugal, and  
56  
57  
58

1  
2  
3 Spain. REPLACE developed a toolkit for conducting participatory action research (PAR) with  
4 communities and a behaviour change cycle framework for enabling community members to  
5 take action to end FGM (Brown et al, 2013). Enabling community members themselves to  
6 gather data from within their communities ensured that '*research is conducted 'with' rather*  
7 *than 'on' the community*' (Brown et al, 2013).  
8  
9

10 "[REPLACE is] *innovative because it focuses on behaviour change; it works directly*  
11 *with the communities, which is quite exceptional in Europe [...It is] framed in a theory of*  
12 *behaviour change, which really has a thorough methodology... and also an evaluation.*"  
13  
14 (KIF06)  
15  
16

17 Participants identified PAR approaches generally as good practice, able to provide in-depth  
18 understanding of the interventions needed with particular communities. Participants identified  
19 a PAR initiative called Participatory Ethnographic Evaluation and Research, developed by  
20 Options and Swansea University, as "*an eye opener for a lot of the community members*"  
21 (KIF15) who recognised that FGM must be addressed in their community and went on to play  
22 key roles in other FGM interventions.  
23  
24  
25  
26  
27

28 Participants described *Ketenaapak* ('Dutch Chain Approach') in the Netherlands as  
29 particularly effective. This model was described as a '*meaningful initiative to involve*  
30 *communities in FGM prevention work and a landmark in the prevention of FGM in the*  
31 *Netherlands*' (EIGE, 2013). In this multi-disciplinary approach, over 100 key community  
32 figures contributed to child protection and prevention through organising home visits and  
33 meetings within their communities to raise FGM awareness (KIF05). Several participants  
34 identified the *Federation of Somali Associations in the Netherlands (FSAN)* as a grassroots  
35 organisation playing an important role in identifying key figures within communities,  
36 coordinating activities, and providing training (KIF02; KIF03),  
37  
38  
39  
40  
41  
42

43 The Tackling FGM Initiative (TFGMI), established in the UK in 2010, was a six-year  
44 collaboration between five funding bodies to strengthen community-based preventative work  
45 (Brown & Porter, 2016). It provided many examples of good practice focused on community-  
46 led prevention and participation in activities across the UK, highlighting the crucial role of  
47 community 'champions' supported by community organisations (Khalifa & Brown, 2016). For  
48 example, a Manor Gardens training programme enabled London women and men to become  
49 paid Community Facilitators and work with healthcare professionals to organise FGM  
50 sessions (KIF18). Another example, Africa Advocacy Foundation, relied on social networks  
51 to create '*sister circles*' (safe spaces for women) to enable community conversations around  
52 FGM in South East London (Khalifa & Brown, 2016). Safe, women-only spaces were  
53  
54  
55  
56  
57  
58  
59  
60

1  
2  
3 considered important '*for women to discover for themselves the nature of their reality through*  
4 *discussions with other women*' (Dominelli, 1995), as a first step in rejecting FGM (Khalifa &  
5 Brown, 2016). As one participant noted, '*one of the mistakes we make is that we assume*  
6 *everyone knows that FGM is harmful whereas many women from communities or women*  
7 *who have experienced FGM don't see that*' (KIF17).  
8  
9

### 10 11 *Protection*

12 Two emerging protection sub-themes were (i) prevention-protection linkages and (ii) effective  
13 protection.  
14  
15

16  
17 *Prevention-protection linkages:* Despite consensus that legislation and criminal justice  
18 approaches helped provide an enabling framework for prevention work, participants noted  
19 that such approaches could not succeed without a parallel focus on prevention.  
20  
21

22 *"Given the deep-rooted cultural nature of harmful traditional practices, we can mount*  
23 *as many arrests as we possibly can [...], but unless...an affected community changes*  
24 *their thinking, then we're never going to truly...prevent or...eradicate these practices."*  
25  
26 (KIM12)  
27  
28

29 Prevention and protection were described by one participant as '*two sides of the same coin,*  
30 *neither can succeed without the other*' (KIF14). However, there are recognised tensions  
31 between these approaches (Berer, 2015, EIGE, 2013). Preventive approaches are generally  
32 more collaborative (EIGE, 2013) and community-focused (Berer, 2015). Protection  
33 approaches, whilst perhaps necessarily promoting an unequivocal message around child  
34 protection, may lead to families being viewed as potential perpetrators (EIGE, 2013). Several  
35 participants highlighted that culturally aggressive top-down approaches imposed on  
36 communities, without the building of trust between families and professionals, could have  
37 unwanted consequences, e.g. girls being taken abroad for FGM (KIF01; Gele et al, 2012) or  
38 already marginalised families, pushed further from mainstream society, '*cling[ing] to their*  
39 *own cultures and traditions more tightly*' (Berer 2015).  
40  
41  
42  
43  
44  
45  
46

47 Participants in France and the Netherlands reported some success in achieving attitudinal  
48 change and reducing FGM through a combination of prevention and protection interventions.  
49 In France, a number of high profile prosecutions and legislative measures had been  
50 accompanied by investment in training and support for professionals, as well as education  
51 and awareness-raising in schools and universities, though the role of communities was not  
52 necessarily clear within this (KIF02). In the Netherlands (i.e. *Katenapaak*), participants  
53 reported most success developing a crucial role for communities within combined prevention  
54  
55  
56  
57  
58  
59  
60

1  
2  
3 and protection responses (KIF05). UK approaches were criticised for failing to effectively link  
4 protection and prevention agendas and involve communities: “...efforts to reduce FGM have  
5 focused on punitive legislation without at the same time empowering women in communities  
6 to engage in debate, change attitudes and create alternative ways of affirming their cultural  
7 identity” (Dustin, 2010). However, describing a successful Police-led community conference,  
8 a UK participant suggested that this was shifting, with many organisations ‘*motivated by the*  
9 *need for change*’ and prepared to support the police in developing ‘*community-driven*’  
10 solutions (KIM12).  
11  
12  
13  
14  
15

16 *Effective protection:* Participants highlighted community involvement in protection  
17 interventions in the Netherlands, UK, and Spain. UK participants noted statutory agencies  
18 involving community organisations at an earlier stage when girls were identified as at risk of  
19 FGM (KIF17, KIF18). For example, FORWARD in London and NEw STep for African  
20 Community (NESTAC) in Manchester worked alongside authorities to deliver family  
21 education sessions, overcoming language and cultural barriers to strengthen engagement  
22 (KIF18). In Bristol, social services increased the capacity of community organisations to take  
23 on ‘safeguarding’ roles, working together to ensure common understandings of risk (KIF18).  
24  
25  
26  
27  
28

29 However, some participants expressed reservations about communities’ role in protection  
30 interventions, suggesting that statutory agencies passing on risk management responsibility  
31 to community organisations was risky (EG1; KIF18). Another noted that community  
32 organisations with experience of case management, e.g. around violence against women or  
33 asylum-seekers, could better manage the complexities of taking on a protection role (Khalifa  
34 & Brown, 2016). A participant described the value of joint-working, in building community  
35 confidence to report concerns.  
36  
37  
38  
39

40 *“If there is a cutter in the community, the chances are higher that the community*  
41 *members would be aware of it than a professional...we need to work with*  
42 *communities to train them and empower them...so they can report for themselves.”*  
43  
44 (KIF17)  
45  
46

47 Other examples included developing tools to support protection of individual women and  
48 girls. The Dutch Government produced a passport-sized declaration, signed by a range of  
49 community and non-community organisations, stating that FGM is forbidden and punishable  
50 by a prison sentence and loss of rights to residency, which families can carry when travelling  
51 overseas (KIF05). A Spanish region produced a similar official letter for families travelling  
52 abroad (KIF01). Participants highlighted the need for such tools to be developed in  
53 partnership with communities, as in the Netherlands. UK participants noted that when a  
54  
55  
56  
57  
58  
59  
60

1  
2  
3 similar tool was developed by the UK Government, communities did not feel ownership of it,  
4 lessening its impact (KIF15).  
5  
6

### 7 *Provision*

8 Two emerging services provision sub-themes were (i) provision roles and (ii) facilitating  
9 access.  
10  
11

12  
13 *Provision roles:* Participants identified community organisations across Europe providing  
14 services from advocacy to psychological support, e.g. Daughters of Eve, FORWARD, FSAN,  
15 and GAMS - the *Groupe pour l'Abolition des Mutilations Sexuelles* (KIF03; KIF06, KIF15;  
16 KIF17). Fewer examples existed of community organisations influencing the planning, design  
17 or delivery of services, although participants concurred on the need for this (KIF17; KIF15;  
18 KIF18).  
19  
20  
21

22 *"If communities are involved they can tell what kind of services they require, rather*  
23 *than...you know coming from top down, where they make assumptions."* (KIF17)  
24  
25

26 *Facilitating access:* Although community organisations seldom delivered clinical services,  
27 they had an important role in facilitating women's engagement *"to understand why that*  
28 *service exists and... taking the time to explain it ...which is something that many health*  
29 *providers don't have the time to do"* (KIF17). UK participants described community  
30 involvement in developing and delivering specialist services (KIF15; KIF18). For example, an  
31 FGM clinic in Bristol was developed in response to lobbying from women who were involved  
32 in its design and sat on its steering group (KIF18). A London project, developed to support  
33 women failing to attend specialist appointments at an FGM clinic, involved community  
34 members calling/meeting clients to explain appointments, which improved services uptake  
35 (KIF18).  
36  
37  
38  
39  
40  
41  
42

43 In response to such barriers as a reluctance to disclose FGM to health professionals (KIF05),  
44 a fear of being criminalised (KIF17), or a lack of trust (KIF18), compounded by health  
45 providers' own discomfort and reluctance to initiate discussions around FGM (Abdulcadir et  
46 al, 2014), community organisations and members were regarded as having a key role in  
47 facilitating access to services. Participants identified an example of a service employing  
48 outreach workers from the community who take on a '*mediating role*' (KIF18). In another  
49 example, the Dutch Government funded a community organisation to implement an  
50 awareness raising campaign to get information to women about services available to them  
51 (KIF05). Another participant described a more informal role.  
52  
53  
54  
55  
56  
57  
58  
59  
60

1  
2  
3 *"I often get people phoning me asking for advice and support... A lot of women would*  
4 *say that they don't want to ask someone outside [...] So we need... a way... to give*  
5 *confidence to women to be able to speak to their GP or health visitor about their fear of*  
6 *FGM without feeling criminalised."* (KIF17)  
7  
8  
9

10 Many participants highlighted the gap between communities and statutory agencies and the  
11 need for engagement models that facilitated improved trust, confidence, and access (KIF15;  
12 KIF15; KIF18; KIF17; KIF08).

### 16 *Barriers to community participation*

17 The main barriers identified to effective work with communities were: (i) cultural, i.e. within  
18 communities; (ii) structural, i.e. external to communities; and (iii) sustainability-related.

21 *Cultural:* Leadership of FGM work is not easy and participants described the importance of  
22 supporting community-members taking on such roles, e.g. through training, information, and  
23 access to services (KIF05; KIF13; KIF13). Negative consequences for community leaders or  
24 activists have been documented (Behrendt, 2011), including verbal abuse, criticism, threats,  
25 and family conflict (KIF05; KIF04; KIF17).

26  
27  
28  
29 *"I've had people from my community who have sent me...hate messages, saying...*  
30 *what you're doing is wrong. And I've had family-members who have said that they*  
31 *will no longer speak to me... and that I... bring shame on them. It's not... easy for me*  
32 *to take on this role. Trust me, there were times when I almost gave up"* (KIF17)  
33  
34  
35  
36

37 Women may worry about bringing shame on their communities or experience shame or guilt  
38 if they speak about FGM to service providers or other 'outsiders' (KIF17; KIF16; Vloebergs,  
39 2013), particularly as some communities are explicitly told not to speak about FGM (KIF17).  
40 Trust-related barriers were thus common between communities and professionals (KIF07;  
41 KIF04), particularly within child protection (KIF18) or health services, where usage of  
42 interpreters could compound trust issues (KIF16; KIF17). Taking time to build trust was  
43 therefore deemed important

44  
45  
46  
47 *'It's not a case of turning up with knowledge, but of starting off with the knowledge of*  
48 *communities themselves, then building something together'* (KIF02)  
49  
50

51 Gender norms and power dynamics within potentially-affected communities were identified  
52 as potential barriers, with several participants highlighting the importance of working with  
53 men and women separately before bringing them together if appropriate (KIF04; KIF07).  
54 While gender oppression was a structural barrier experienced by women globally, "its  
55  
56  
57  
58  
59  
60

1  
2  
3 *manifestation differs according to culture, country and social grouping*' (Dominelli, 2011) thus  
4 affecting which avenues were open to women to challenge or engage with FGM.  
5  
6

7 *Structural:* Lack of understanding among professionals of the value and potential role of  
8 communities was highlighted as a key barrier to their involvement in interventions. Key  
9 decision-makers and service providers would need to change the ways in which they work to  
10 ensure that communities were actively involved and heard. One participant provided an  
11 example of statutory professionals in Bristol who developed alternative ways of engaging  
12 with communities including attending community events, holding informal consultations, and  
13 making meetings and meeting space more equitable and community friendly (KIF18). Lack of  
14 compensation for travel and childcare expenses was cited as a barrier by several  
15 participants, including a lack of understanding by some professionals of why such expenses  
16 would even be required (KIF06; KIF17; KIF18).  
17  
18

19 *'It still feels like there is a need to explain the added value of communities to the*  
20 *powers that be.'* (KIF18)  
21  
22  
23  
24  
25

26 *Sustainability:* Participants in different contexts raised concerns about the sustainability of  
27 FGM interventions, particularly those at community level that required long-term investment.  
28 Some indicated that although community-led organisations were often approached for their  
29 expertise, they were rarely funded for this advisory role (KIF15) and that significant  
30 government funding was needed (KIF06; KIF15). Others highlighted the need for longer-term  
31 investment in implementation and action beyond developing protocols, frame-works, and  
32 action plans (KIF15; KIF03). Several noted that much of the work of community organisations  
33 was not financially valued, with one participant stressing how important it was to recognise  
34 the challenging nature of this work, which is *'under-valued and under-resourced'*, and  
35 questioning how long community members could continue to volunteer in such challenging  
36 roles (KIF15).  
37  
38  
39  
40  
41  
42  
43

## 44 **Discussion**

### 45 *Principle findings*

46 Clear consensus emerged that potentially-affected communities should have a role in all  
47 intervention areas and that this was vital to addressing FGM in Europe (EIGE, 2013; Brown  
48 et al, 2013; Khalifa & Brown, 2016). Despite this consensus and several examples of good  
49 practice, community roles remained inconsistent in FGM interventions and often non-existent  
50 in FGM policy development. Most FGM interventions across Europe focused on awareness-  
51 raising, and despite some examples of good practice, community participation appeared  
52 fairly minimal (Brown et al, 2013; EIGE, 2013). The extent of community participation varied  
53  
54  
55  
56  
57  
58  
59

1  
2  
3 between and within countries. While community participation was accepted as vital, practices  
4 associated with community participation varied enormously. This corresponded with the  
5 significant literature highlighting challenges inherent in increasing community participation,  
6 e.g. what level of participation (Arnstein, 1969, Cornwall, 2015), '*who participates, in what,*  
7 *and for whose benefit*' (Cornwall, 2015), and to what extent government organisations that  
8 engage with communities could change to develop truly participatory processes and spaces  
9 (Eversole, 2012).  
10  
11  
12

13  
14 The role of communities appeared most developed within prevention interventions, with good  
15 practice examples of both community-led initiatives and partnership. Protection-focused  
16 approaches were more challenging in terms of participation, as the clear child-protection  
17 focus could stigmatise families (Gele et al, 2012, EIGE, 2013). Community participation  
18 within safeguarding varied, with examples of both effective and emerging roles. Individuals  
19 and organisations had roles in building trust and bridging gaps between communities and  
20 authorities, though responsibility for managing risk should remain firmly with statutory bodies  
21 (Khalifa & Brown, 2016). While several community-led organisations delivered a range of  
22 services, few examples were found of communities participating in designing, delivering or  
23 evaluating statutory services. Good practice examples were identified of community  
24 organisations or activists playing a key role in facilitating services access and enabling  
25 dialogue within communities to occur (Khalifa & Brown, 2016).  
26  
27  
28  
29  
30  
31  
32

### 33 34 *Implications for policy and practice*

35 Engaging potentially-affected communities in coordinated multi-agency responses appears  
36 critical to the success of FGM policies and interventions in Europe. Decision-makers and  
37 service providers should invest in community engagement by (i) ensuring that community  
38 organisations can participate actively in future interventions and (ii) addressing cultural,  
39 structural, and sustainability-related barriers to participation.  
40  
41  
42  
43

44 Supporting and strengthening community organisations can improve engagement. Bottom-up  
45 approaches that enable dialogue within communities appear most successful. Community  
46 development support could enable potentially-affected communities to identify their own  
47 FGM-related concerns and aspirations and work collectively to identify solutions and take  
48 action. This requires long-term investment in community development support and  
49 community organisations themselves, to support community-led interventions and  
50 meaningful engagement between communities and policy-makers.  
51  
52  
53  
54  
55  
56  
57  
58  
59  
60

1  
2  
3 Research on FGM interventions across Europe is limited, when compared to levels of  
4 activism. Research has focused on clinical care, provision of health services, and attitudes  
5 towards FGM. Minimal investigation has been conducted on the role of diaspora  
6 communities and their contributions to challenging and responding to FGM. Empowerment,  
7 engagement, and participation are frequently mentioned, but rarely critically examined, with  
8 little discussion about how to move beyond rhetoric towards putting these concepts into  
9 practice. Further research with communities, including participatory methods, appears  
10 warranted.  
11  
12  
13  
14  
15

### 16 *Limitations*

17 This study had three significant limitations. First, this study was exploratory and participant  
18 numbers were limited due to time and resource constraints. Second, numbers of participants  
19 from potentially-affected communities were limited and further community engagement is  
20 needed to expand on issues raised. Finally, focus on European interventions ignored the  
21 successfully designed and implemented African interventions (e.g. TOSTAN;  
22 [www.tostan.org](http://www.tostan.org)) that offer international benchmarks for changing attitudes and reducing  
23 FGM (Baillot et al, 2014).  
24  
25  
26  
27  
28

### 29 **Conclusion**

30 Exploring the role of communities within interventions to address FGM in Europe allowed  
31 critical examination of how crucial community voices remain marginalised and could be  
32 better heard and supported. “*Without an effective commitment to the participation and*  
33 *empowerment of potentially-affected communities, policy-makers and practitioners will not*  
34 *identify the actual risks experienced by diaspora girls and women in Europe or develop*  
35 *effective interventions, and risk further marginalising those community voices that are the*  
36 *most effective advocates for change” (Baillot et al, 2014). Results demonstrate that it is*  
37 *possible to work alongside potentially-affected communities, benefitting from community*  
38 *perspectives and expertise, to develop meaningful partnerships and support community-led*  
39 *interventions.*  
40  
41  
42  
43  
44  
45  
46

### 47 **Declarations**

#### 48 *Conflict of interest*

49 None declared.  
50  
51  
52

#### 53 *Author contributions*

54 EC contributed to study design, data collection and analysis and drafted the manuscript. NM  
55 contributed to study design, data analysis, and manuscript writing. HB contributed to study  
56  
57  
58

1  
2  
3 design, data collection and analysis, and critically reviewed the manuscript. NH contributed  
4 to study design and data interpretation and critically revised the manuscript. All authors  
5 approved the version for submission.  
6  
7

### 8 *Acknowledgements*

9  
10 Special thanks to key informants, particularly women from potentially-affected communities,  
11 for their invaluable insights.  
12  
13

### 14 *Funding*

15  
16 This work was supported by the Scottish Government Equality Fund and Rosa FGM Small  
17 Grants Programme for funding research.  
18  
19

### 20 *Data sharing*

21  
22 Anonymised dataset and coding are available on request in accordance with LSHTM  
23 institutional data management policy.  
24  
25

### 26 **References**

- 27  
28 Abdulcadir, J, Dugerdil, A, Boulvain, M, Yaron, M, Margairaz, C, Irion, O and Petignat, P  
29 (2014) *Missed opportunities for diagnosis of female genital mutilation*, International  
30 Journal of Gynecology and Obstetrics, Vol.125, pp. 256–260  
31  
32 Andro, A, Lesclingand, M and Pourette, D (2009) *Volet qualitatif du projet Excision et*  
33 *Handicap (ExH): Comment orienter la prévention de l'excision chez les filles et jeunes*  
34 *filles d'origine Africaine vivant en France: Une étude des déterminants sociaux et*  
35 *familiaux du phénomène*, Université Paris and INED  
36  
37 Arnstein, S (1969) A ladder of citizen participation, AIP Journal, July  
38  
39 Baillot, H, Murray, N, Connelly, E, and Howard, N. (2014) *Tackling Female Genital Mutilation*  
40 *in Scotland: towards a Scottish model of intervention*, Scottish Refugee Council and  
41 London School of Hygiene and Tropical Medicine  
42  
43 Baillot H, Murray N, Connelly E, Howard N (in submission): *Addressing female genital*  
44 *mutilation in Europe: a scoping review of prevention, prosecution, protection, and*  
45 *service provision interventions*  
46  
47  
48 Behrendt, A (2011) *Listening to African Voices. Female Genital Mutilation/Cutting among*  
49 *Immigrants in Hamburg: Knowledge, Attitudes and Practice*, Plan International,  
50 Germany, H, Murray, N, Connelly, E, and Howard, N. (2014) *Tackling Female Genital*  
51 *Mutilation in Scotland: towards a Scottish model of intervention*, Technical Report of  
52 the Scottish Refugee Council and London School of Hygiene and Tropical Medicine  
53  
54  
55  
56  
57  
58  
59  
60

- 1  
2  
3 Berer, M (2015) *The history and role of criminal law in anti-FGM campaigns: Is the criminal*  
4 *law what is needed, at least in countries like Great Britain?* Reproductive Health  
5 Matters, Vol. 23, pp. 145-157  
6
- 7 Berg, RC and Denison, E (2013) *A Tradition in Transition: Factors Perpetuating and*  
8 *Hindering the Continuance of Female Genital Mutilation/Cutting (FGM/C) Summarized*  
9 *in a Systematic Review*, Health Care for Women International, Vol. 34, pp. 837–859  
10
- 11 Brown, K, Beecham, D and Barrett, H (2013) *The Applicability of Behaviour Change in*  
12 *Intervention Programmes Targeted at Ending Female Genital Mutilation in Europe:*  
13 *Integrating Social Cognitive and Community Level Approaches*, Obstetrics and  
14 Gynaecology International 2013  
15
- 16 Brown, E, Porter, C (2016) *The Tackling FGM Initiative: Evaluation of the Second Phase*  
17 *(2013 – 2016)*, Options Consultancy Services Limited, London  
18
- 19 Community Development National Occupational Standards, March 2015,  
20 [http://www.fcdl.org.uk/learning-qualifications/community-development-national-](http://www.fcdl.org.uk/learning-qualifications/community-development-national-occupational-standards/)  
21 [occupational-standards/](http://www.fcdl.org.uk/learning-qualifications/community-development-national-occupational-standards/)  
22  
23  
24
- 25 Cornwall, A (2008) *Unpacking 'Participation': model, meanings and practices*, Oxford  
26 University Press and Community Development Journal  
27
- 28 Costello, S, Quinn, M, Tatchell, A, Jordan, L, and Neophytou, K (2013) *In the Best Interests*  
29 *of the Child: Preventing Female Genital Cutting (FGC)*, British Journal of Social Work  
30 (2013), pp. 1–18  
31
- 32 Dominelli, L (1995) Women in the community: feminist organising principles and organising  
33 in community work, Community Development Journal, Vol. 30 No 2, pp 133-143  
34
- 35 Dustin, M (2010) *Female Genital Mutilation/Cutting in the UK: Challenging the*  
36 *Inconsistencies*, European Journal of Women's Studies, Vol. 17:7  
37
- 38 Esmée Fairbairn Foundation (2013) *Tackling Female Genital Mutilation in the UK: What*  
39 *works in community-based prevention work*, London  
40
- 41 European Institute for Gender Equality (EIGE) (2013) *Female genital mutilation in*  
42 *European Union and Croatia*, EIGE, Belgium  
43
- 44 Eversole, R (2012), *Remaking Participation: challenges for community development practice*,  
45 Community Development Journal, Vol 47:1, pp. 29 -41  
46
- 47 Gele, AA, Johansen, EB and Sundby, J (2012) *When female circumcision comes to the*  
48 *West: Attitudes toward the practice among Somali Immigrants in Oslo*, BMC Public  
49 Health Vol. 12, p. 697  
50
- 51 Hemmings, J (2011) *The FGM Initiative: interim report*, Options UK  
52
- 53 Johnsdotter, S (2009) *The FGM Legislation Implemented: Experiences from Sweden*, Malmö  
54 University  
55  
56  
57  
58  
59  
60

- 1  
2  
3 Johnsdotter, S, Moussa, K, Carlbom, A, Aregai, R and Essén, B (2008) “Never My  
4 *Daughters*”: A Qualitative Study Regarding Attitude Change Toward Female Genital  
5 *Cutting Among Ethiopian and Eritrean Families in Sweden*, Health Care for Women  
6 International, Vol. 30:1-2, pp. 114-133  
7  
8 Isman, E, Ekéus, C, Berggren V (2013), *Perceptions and experiences of female genital*  
9 *mutilation after immigration to Sweden: An explorative study* Sexual & Reproductive  
10 Healthcare 4 (2013) 93–98  
11  
12 Kaplan Marcusán, A and López Gay, A (2009) *Mapa de la Mutilación Genital Femenina en*  
13 *España 2009*, Universitat Autònoma de Barcelona  
14  
15 Kaplan A, Hechavarria S, Martin M, Bonhoure I (2011): Health consequences of female  
16 genital mutilation/cutting in the Gambia, evidence into action. *Reprod Health*;8:26.  
17  
18 Khaja, K, Barkdull, C, Augustine, M, Cunningham, D, *Female genital cutting: African women*  
19 *speak out*, International Social Work 52(5): 1 – 15  
20  
21 Khalifa,S, Brown,E (2016), ‘Communities Tackling FGM in the UK: Best Practice Guide’, the  
22 Tackling Female Genital Mutilation Initiative and Options Consultancy Services Limited,  
23 London  
24  
25 Leye, E Mergaert, L, Arnaut, C, and O’Brien Green, S, (2014) Towards a better estimation of  
26 prevalence of female genital mutilation in European Union: interpreting existing  
27 evidence in all EU Member States. *Genus*, 70 (1) Martin, 2007  
28  
29 Norman, K, Hemmings, J, Hussein, E and Otoo-Oyortey, N (2009) *FGM is always with us.*  
30 *Experiences, Perceptions and Beliefs of Women Affected by Female Genital Mutilation*  
31 *in London: Results from a PEER Study*, Options Consultancy Services and FORWARD  
32  
33 Prohibition of Female Genital Mutilation (Scotland) Act 2005. Available at:  
34 <http://www.legislation.gov.uk/asp/2005/8/notes/contents> (Accessed: 10 November  
35 2015).  
36  
37 Reig Alcaraz, M, Siles Gonzalels, J and Solano Ruiz, C (2013) Attitudes towards female  
38 genital mutilation: an integrative review, *International Nursing Review*  
39  
40 Scottish Government (2016), *Equally Safe*, at [www.gov.scot/Resource/0045/00454152.pdf](http://www.gov.scot/Resource/0045/00454152.pdf)  
41  
42 Scottish Government (2016), *Scotland’s National Action Plan to Prevent and Eradicate FGM*  
43 *2016-2020*, at [www.gov.scot/Resource/0049/00493752.pdf](http://www.gov.scot/Resource/0049/00493752.pdf)  
44  
45 Shaw, M. (2013), *Community Work Today: Competing Demands in Practice*, Concept,  
46 Vol.4:2  
47  
48 Tong, A, Sainsbury, P & Craig, J (2007), Consolidated criteria for reporting qualitative  
49 research (COREQ): a 32-item checklist for interviews and focus groups. *Int J Qual*  
50 *Health Care*, 19, 349-57  
51  
52 UNICEF (2013), *Female Genital Mutilation/Cutting: A Statistical overview and exploration of*  
53 *the dynamics of change*, UNICEF, New York  
54  
55  
56  
57  
58  
59

1  
2 UNICEF (2015) *Female Genital Mutilation/Cutting: A Global Concern*, UNICEF, New York  
3  
4 Vloebergs, E, Vander Kwaak, A, Knipsheer, J & van den Muijsenbergh, M (2012), *Coping*  
5  
6 and chronic psychosocial consequences of female genital mutilation in the  
7  
8 Netherlands, *Ethnicity and Health*, Vol. 17.6, pp. 677-695  
9  
10 WHO (2016), *Female genital mutilation: Fact sheet N°241*,  
11  
12 <http://www.who.int/mediacentre/factsheets/fs241/en/>  
13  
14  
15  
16  
17  
18  
19  
20  
21  
22  
23  
24  
25  
26  
27  
28  
29  
30  
31  
32  
33  
34  
35  
36  
37  
38  
39  
40  
41  
42  
43  
44  
45  
46  
47  
48  
49  
50  
51  
52  
53  
54  
55  
56  
57  
58  
59  
60

For peer review only

## Tables

### Table 1. Key definitions

|                                |                                                                                                                                                                                                                                                                                                                                                                                                                                                                                                                                                                                                                                                                                      |
|--------------------------------|--------------------------------------------------------------------------------------------------------------------------------------------------------------------------------------------------------------------------------------------------------------------------------------------------------------------------------------------------------------------------------------------------------------------------------------------------------------------------------------------------------------------------------------------------------------------------------------------------------------------------------------------------------------------------------------|
| Female genital mutilation      | All procedures that involve partial or total removal of the female external genitalia, or other injury to the female genital organs for non-medical reasons (WHO, 2016)                                                                                                                                                                                                                                                                                                                                                                                                                                                                                                              |
| Community                      | A community of identity has a common bond based on ' <i>geography, identity or interest</i> ' (CDNOS, 2015)                                                                                                                                                                                                                                                                                                                                                                                                                                                                                                                                                                          |
| Community development          | Community development enables people to work collectively to bring about positive social change. This long-term process starts from people's own experience and enables communities to work together to: <ul style="list-style-type: none"> <li>• identify their own needs and actions;</li> <li>• take collective action using their strengths and resources;</li> <li>• develop their confidence, skills and knowledge;</li> <li>• challenge unequal power relationships;</li> <li>• promote social justice, equality and inclusion;</li> </ul> to improve the quality of their own lives, the communities in which they live and societies of which they are a part (CDNOS, 2015) |
| Participation                  | Policy-making and practice development around violence against women is shaped by the experiences, needs and views of those affected by FGM (Baillot <i>et al</i> , 2014).                                                                                                                                                                                                                                                                                                                                                                                                                                                                                                           |
| Potentially-affected community | A diaspora community from one of 29 countries identified by Unicef, in which FGM practices are concentrated, i.e. Somalia 98%, Guinea 96%, Djibouti 93%, Egypt 91%, Eritrea 89%, Mali 89%, Sierra Leone 88%, Sudan 88%, Gambia 76%, Burkina Faso 76%, Ethiopia 74%, Mauritania 69%, Liberia 66%, Guinea-Bissau 50%, Chad 44%, Cote d'Ivoire 38%, Kenya 27%, Nigeria 27%, Senegal 26%, CAR 24%, Yemen 23%, Tanzania 15%, Benin 13%, Iraq 8%, Ghana 4%, Togo 4%, Niger 2%, Cameroon 1%, Uganda 1% (Unicef, 2013)                                                                                                                                                                       |
| Prevention                     | Interventions intended to create and/or sustain behavioural and attitudinal change within affected communities (Baillot <i>et al</i> , 2014)                                                                                                                                                                                                                                                                                                                                                                                                                                                                                                                                         |
| Protection                     | Interventions intended to protect the individual rights of women and girls who are at risk of or have experienced FGM (Baillot <i>et al</i> , 2014)                                                                                                                                                                                                                                                                                                                                                                                                                                                                                                                                  |
| Service provision              | Service responses to survivors of FGM (Baillot <i>et al</i> , 2014)                                                                                                                                                                                                                                                                                                                                                                                                                                                                                                                                                                                                                  |

**Table 2. Participant characteristics**

| <b>ID</b> | <b>Role/Title</b>                         | <b>Location</b> | <b>Interview type</b> |
|-----------|-------------------------------------------|-----------------|-----------------------|
| KIF01     | University Professor                      | Spain (Skype)   | KII                   |
| KIF02     | NGO Worker                                | France          | KII                   |
| KIF03     | NGO Worker                                | Netherlands     | KII                   |
| KIF04     | Teacher                                   | England         | KII                   |
| KIF05     | Government Minister                       | Netherlands     | KII                   |
| KIF06     | University Professor                      | Belgium         | KII                   |
| KIF07     | Community Activist                        | Ireland (Skype) | KII                   |
| KIF08     | Medical Professional                      | England         | KII                   |
| KIF09     | University Professor                      | France          | KII                   |
| KIF10     | INGO Worker                               | EU              | KII                   |
| KIF11     | Solicitor                                 | Scotland        | KII                   |
| KIM12     | Chief Superintendent                      | England         | KII                   |
| KIF13     | Chief Inspector                           | England         | KII                   |
| KIF14     | Legal professional                        | France          | KII (unrecorded)      |
| KIF15     | NGO Worker                                | England         | KII                   |
| KIF16     | Medical professional                      | Scotland        | KII                   |
| KIF17     | Community Activist                        | Scotland        | KII                   |
| KIF18     | Community Activist                        | Scotland        | KII                   |
| EG1       | 9 policy/practice participants            | Scotland        | Group interview       |
| EG2       | 9 policy/practice/community participants  | Scotland        | Group interview       |
| EG3       | 10 policy/practice/community participants | Scotland        | Group interview       |
| CG1       | 4 community activists                     | Scotland        | Group interview       |
| CG2       | 4 community activists                     | Scotland        | Group interview       |

# BMJ Open

## Missing from the debate? A qualitative study exploring the role of communities within interventions to address female genital mutilation in Europe

|                                 |                                                                                                                                                                                                                         |
|---------------------------------|-------------------------------------------------------------------------------------------------------------------------------------------------------------------------------------------------------------------------|
| Journal:                        | <i>BMJ Open</i>                                                                                                                                                                                                         |
| Manuscript ID                   | bmjopen-2017-021430.R1                                                                                                                                                                                                  |
| Article Type:                   | Research                                                                                                                                                                                                                |
| Date Submitted by the Author:   | 28-Mar-2018                                                                                                                                                                                                             |
| Complete List of Authors:       | Connelly, Elaine; Scottish Refugee Council<br>Murray, Nina; Scottish Refugee Council<br>Baillot, Helen; Scottish Refugee Council<br>Howard, Natasha; London School of Hygiene & Trop Med, Global Health and Development |
| <b>Primary Subject Heading</b>: | Public health                                                                                                                                                                                                           |
| Secondary Subject Heading:      | Health policy                                                                                                                                                                                                           |
| Keywords:                       | Violence against women, Female genital mutilation, Europe                                                                                                                                                               |
|                                 |                                                                                                                                                                                                                         |

SCHOLARONE™  
Manuscripts

1  
2  
3 **Missing from the debate? A qualitative study exploring the role of communities within**  
4 **interventions to address female genital mutilation in Europe**  
5  
6

7 Elaine Connelly<sup>1</sup>, Nina Murray<sup>1</sup>, Helen Baillot<sup>1</sup>, Natasha Howard<sup>2§</sup>  
8  
9

10 §Corresponding author  
11  
12

13 <sup>1</sup> Scottish Refugee Council, Portland House, 17 Renfield St, Glasgow G2 5AH  
14

15 <sup>2</sup> London School of Hygiene and Tropical Medicine, Department of Global Health and  
16 Development, 15-17 Tavistock Place, London WC1H 9SH  
17  
18

19 EC: [econnelly@mail.com](mailto:econnelly@mail.com)

20 NM: [nina@ninamurray.uk](mailto:nina@ninamurray.uk)

21 HB: [helen@hmbaillot.co.uk](mailto:helen@hmbaillot.co.uk)

22 NH: [natasha.howard@lshtm.ac.uk](mailto:natasha.howard@lshtm.ac.uk)  
23  
24  
25

26 **Key words**  
27

28 FGM, female genital cutting, community development, Europe  
29  
30  
31  
32  
33  
34  
35  
36  
37  
38  
39  
40  
41  
42  
43  
44  
45  
46  
47  
48  
49  
50  
51  
52  
53  
54  
55  
56  
57  
58  
59  
60

## Abstract

### *Introduction*

Public attention on female genital mutilation in diaspora communities is increasing in Europe, as health and social welfare implications become better understood. This study explored the role of potentially-affected communities within interventions to address female genital mutilation in Europe, examining current practices, promising interventions, and remaining gaps.

### *Methods*

A qualitative study design incorporated 18 individual key informant interviews and five semi-structured group interviews with policy-makers, service providers, and community representatives. Data were analysed thematically, guided by the Scottish Government '4Ps' framework for addressing violence against women and girls, i.e. prevention, protection, provision of services, and participation.

### *Results*

Participants emphasised both the importance of community participation and the lack of consistent engagement by policy-makers and practitioners. All indicated that communities had a key role, though most interventions focussed on awareness-raising rather than community empowerment, behaviour change, or influence on the design, delivery, and/or evaluation of interventions.

### *Conclusions*

Despite clear consensus around the need to engage, support, and empower potentially-affected communities and several examples of meaningful community participation in addressing female genital mutilation (e.g. REPLACE, REPLACE 2, *Ketenaapak*, Tackling FGM Initiative ), the role of communities remains inconsistent and further engagement efforts are necessary.

### **Strengths and limitations**

- This study was exploratory and participant numbers were limited, including members of potentially-affected communities, due to time and resource constraints.
- Study focus was on European interventions, thus excluding many innovative and successful African interventions.
- Nevertheless, this study is a rare effort to examine the under-researched role of diaspora communities in initiatives to address female genital mutilation in Europe, drawing from in-depth and semi-structured key informant interviews.

## Introduction

Female genital mutilation (FGM), a practice, defined in Table 1, that expresses '*deeply entrenched gender inequalities, grounded in a mix of cultural, religious and social facts inherent within patriarchal families and communities,*' is recognised internationally as a violation of the fundamental rights of women and girls and a serious form of gender-based violence[1]. Health implications of FGM are wide-ranging and well-established. Immediate health consequences include shock, haemorrhage, infection, and psychological trauma, while long-term risks include chronic pain, infections, cheloids, primary infertility, urogenital complications, birth complications, and danger to newborns[2, 3]. Though sometimes referred to as 'cutting' or 'female circumcision', this article uses 'FGM' to acknowledge the harm to women and communities.

Data indicate the existence of large communities potentially-affected by FGM in many European countries[1, 4]. For example, 23,979 people born in one of 29 'FGM-practising countries'[5], were living in Scotland in 2011[6]. However, attempts to estimate numbers of women and girls who have undergone or are at risk of FGM in diaspora communities in Europe have proven difficult due to data limitations and lack of agreement on prevalence estimation methods[4]. Additionally, the extent to which migration experiences may change attitudes and practices remains under-researched[7]. This article uses the term 'potentially-affected communities' to avoid presumptions attached to 'FGM practising communities' that may be inaccurate in a migratory context[8].

The concept of community is not straightforward, with a range of contradictory and related meanings used on all sides of the political spectrum[9]. Often defined by geography, interest, or identity, communities are not homogenous or static but rather diverse, dynamic, and multifaceted entities[10]. This article primarily describes communities of identity, where the common bond is often nationality, ethnicity, and the experience of exile, although some may also be issue-based or geographical.

FGM is described as a '*tradition in transition*'[11], with some experts asserting that empowering affected communities will lead to its elimination[7, 12, 13]. Public, media, and political attention on FGM in diaspora communities within Europe has increased, but often focuses on criminal justice and child protection[14]. While many European countries have enacted legislation and policy initiatives, the role of communities in interventions addressing FGM remains limited[1, 14]. Little research has been conducted on the role of communities in FGM interventions and very few have been rigorously evaluated[15]. Thus, community

1  
2  
3 voices are generally missing from FGM policy debates and partnerships, despite growing  
4 consensus that communities are key in addressing FGM[16]. Working with potentially-  
5 affected communities may provide a key opportunity, as the process of migration and exile  
6 allows communities to reflect, question, and debate traditional beliefs[17, 18].  
7  
8  
9

10 This study aimed to explore the role of communities within interventions to address FGM in  
11 Europe, describing perspectives of practitioners, activists, and community representatives on  
12 current practices, promising interventions, and gaps that should be addressed. Findings are  
13 presented using the Scottish Government's 4Ps framework (i.e. prevention, protection,  
14 provision of services, participation) described in its strategic approach to tackling violence  
15 against women[19]. This approach reflects and builds upon European level work, e.g. the  
16 European Institute for Gender Equality identifies five focus areas (i.e. prevalence, prevention,  
17 protection, prosecution, provision of services) as does the Due Diligence Standard of the  
18 Istanbul Convention (i.e. prevent, protect, prosecute and punish, provide services and  
19 redress) that was signed by 47 countries with FGM interventions[1, 20]. Thus, themes have  
20 relevance for policy-makers, researchers, community development practitioners, and  
21 professionals working with potentially-affected communities.  
22  
23  
24  
25  
26  
27  
28

## 29 **Methods**

### 30 *Study design*

31 A qualitative study design was selected, drawing on data from a scoping literature review[21]  
32 and interviews (i.e. individual and group) with Europe-based academics, legal professionals,  
33 statutory and voluntary service providers, community activists, and representatives from  
34 potentially-affected communities. The research question was "*What is the role of potentially-  
35 affected diaspora communities in interventions that respond to and challenge FGM in  
36 Europe?*" Table 1 provides definitions used.  
37  
38  
39  
40  
41  
42

### 43 *Participant sampling and recruitment*

44 Individual interview participants were recruited purposively to include academics, policy-  
45 makers, police officers, NGO staff, and community activists in EEA member countries with  
46 recognised FGM responses. Potential participants were selected from FGM publication  
47 authors and conference presenters, heads of relevant government departments and NGO  
48 programmes, community activists, and snowballing from other participants. Of 27 invitees, 18  
49 participated.  
50  
51  
52  
53

54 Group interview participants were recruited purposively to include senior and mid-level  
55 policy-makers, statutory and voluntary service providers, and community representatives  
56  
57  
58

1  
2  
3 selected for their FGM expertise and activism. Potential participants were selected from  
4 managers of relevant government departments, NGOs, community organisations, and  
5 activists who had worked with Scottish Refugee Council on women's rights projects. To  
6 reduce barriers to participation for some community representatives, travel expenses and  
7 childcare were provided. Of 59 invitees, 36 participated.  
8  
9

### 10 11 *Data collection*

12 *In-depth key-informant interviews* were conducted by EC and HB in English and French.  
13 Interviews lasted approximately 60 minutes, were audio recorded or scribed depending on  
14 permission, and conducted in locations of participants' choosing.  
15  
16  
17

18  
19 *Semi-structured group interviews* were facilitated by EC and NM in English. Discussions  
20 lasted approximately 1.5 hours, included 4-9 participants, were either audio-recorded or  
21 scribed, and facilitated in a central Glasgow venue.  
22  
23

### 24 25 *Analysis and reporting*

26 Data were analysed thematically. The Scottish Government's strategic approach to  
27 preventing and eradicating violence against women and girls '4Ps' framework (i.e.  
28 prevention, protection, provision, participation) was used for initial deductive coding.  
29 Additional themes emerged using inductive coding. EC and NM coded data using *Dedoose*  
30 software, with checks by HB. Discrepancies were resolved through discussion and  
31 agreement among all authors. Reporting adhered to COREQ criteria for qualitative  
32 research[22].  
33  
34  
35  
36  
37

### 38 39 *Patient and public involvement*

40 As 'patient involvement' was not applicable to this study, community advocates and women  
41 from potentially-affected communities acted as civil society and public representatives.  
42 Development of research question and outcome measures were informed by women's  
43 priorities, experience, and preferences through consultation with women's groups and review  
44 of unpublished literature. Women and advocates from potentially-affected communities were  
45 involved in study recruitment and conduct through the use of snowball sampling of  
46 participants and review of initial findings. Results were disseminated to study participants  
47 through sharing of the technical report, invitation to the report launch event, and open access  
48 publication of related articles.  
49  
50  
51  
52  
53

### 54 55 *Ethics*

1  
2  
3 The Research Ethics Committee of the London School of Hygiene & Tropical Medicine  
4 granted ethics approval (reference 7977).  
5  
6

## 7 **Findings**

8 Table 2 shows 18 individual interviews were conducted with participants working EU-wide  
9 and/or in seven countries with active interventions addressing FGM (i.e. Belgium, England,  
10 France, Ireland, Netherlands, Scotland, Spain). Five group interviews were conducted with a  
11 total of 36 policy-makers, service providers, and community representatives. Community  
12 participants, from Sudan, Somalia, Gambia, and Uganda, were activists or representatives of  
13 voluntary or community-led organisations working to address FGM.  
14  
15  
16  
17  
18

19 The role of communities is reported under the four 4Ps framework themes and one emergent  
20 theme (i.e. barriers to involvement). Each thematic section includes analysis of the extent to  
21 which potentially-affected communities were involved in addressing FGM in Europe  
22  
23  
24

### 25 *Prevention*

26 The role of potentially-affected communities in prevention is described under three emergent  
27 sub-themes of: (i) women's leadership; (ii) roles of men, youth, and religious leaders; and (iii)  
28 effective prevention interventions.  
29  
30  
31

32 *Women's leadership:* Participants identified women from potentially-affected communities,  
33 including survivors, as playing key roles in addressing FGM. Provided they had the trust and  
34 respect of their communities, these '*knowledgeable cultural guides*[23] were considered  
35 central to changing community behaviours. A participant explained that while '*it doesn't need*  
36 *to be a survivor...you do need someone from that community*' (KIF07). Norman and  
37 colleagues noted the effectiveness of messages from within communities:  
38  
39  
40

41 *'Women's arguments against FGM, spoken fluently and in their own words and*  
42 *crucially, coming from within the community, provide an important resource for those*  
43 *working to end FGM*[16]  
44  
45  
46

47 A UK participant highlighted the significance of a women-led '*African diaspora organisation*'  
48 addressing FGM:  
49

50 *"People recognize that we seem to have some kind of understanding of the issues...  
51 We...brought a woman from Somalia to deliver a session on social services and  
52 safeguarding children. It was a different dynamic... because this is somebody from the  
53 community talking about these issues."* (KIF15)  
54  
55  
56  
57  
58  
59  
60

1  
2  
3 *Roles of men, youth, and religious leaders:* While women from affected communities have  
4 been vital in prevention interventions, participants identified the important male role that was  
5 often missing.  
6

7 *'Something that's really missing is when we talk about the community, we always*  
8 *target women, but what about the men, are they not part of the decision-making?*  
9 *FGM is not only the woman's decision.'* (KIF07)  
10  
11  
12

13 Male perspectives provided deeper reflection about cultural complexities surrounding FGM  
14 and the most common arguments for its continuation[24]. One participant noted that men  
15 were increasingly involved and no longer viewed FGM as strictly *'women's business'* (KIF02).  
16 Another participant noted that men in migratory contexts were far more likely to be involved  
17 than in countries of origin (KIF09). In the Netherlands, involving men was common:  
18  
19

20 *'I never heard it was difficult to involve men and the men I've spoken with are very*  
21 *passionate.'* (KIF05).  
22  
23  
24

25 Participants identified young people as critical *'advocates of change'* (KIF15) and *'parents of*  
26 *the next generation'* (KIF04), able to speak freely about FGM and more likely to become  
27 involved in community activism. One participant noted that young people were most at risk of  
28 FGM and so educating and working with young people was vital if girls were expected *'to*  
29 *come forward and express their fear of having FGM'* (KIF17). Examples of effective work with  
30 British young people included Daughters of Eve, Integrate Bristol, and FORWARD. In Ireland  
31 and the UK, young people were involved in projects including *'using films and resources to*  
32 *support [...] statutory professionals in schools'* (KIF07), and developing poetry, radio  
33 documentaries, films, and music videos to *'encourage that conversation to happen in as*  
34 *many different settings as you can'* (KIF04).  
35  
36  
37  
38  
39  
40

41 Religious leaders influenced many communities and therefore could play a *'pivotal and*  
42 *respected role'* [25]. As one participant stated, *'in our community when we are worried about*  
43 *anything we contact our religious leaders'*, suggesting involvement of religious leaders could  
44 be key (KIF17). Most religious leaders were men, potentially easing work with other men  
45 (KIF17). However, another source noted the need *'to critically examine the added benefit'* as  
46 preventative work had challenged the religious justifications of FGM without necessarily  
47 involving religious leaders[25].  
48  
49  
50  
51  
52

53 *Effective interventions:* The World Health Organisation (WHO) recommended a shift from  
54 awareness-raising to behaviour change approaches in 2009[1]. However, despite some  
55 exceptions, prevention interventions focused on awareness-raising rather than  
56  
57  
58  
59  
60

1  
2  
3 empowerment and targeted behaviour change[1, 15]. Awareness-raising approaches often  
4 had broad target audiences and aims rather than focusing on communities most at risk.  
5 Thus, 'key targets ...may not be fully reached or engaged'[1]. Equally, approaches that  
6 focused on individual change, without acknowledging community belief systems, have  
7 resulted in slow progress addressing FGM across Europe[15]. When community  
8 organisations and statutory professionals worked together on prevention work, using joint  
9 messages on ending FGM, FGM rejection reportedly increased[25, 26].

14  
15 Participants identified EU-funded REPLACE and REPLACE2 programmes as effective  
16 prevention interventions, focused on Belgium, England, Italy, the Netherlands, Portugal, and  
17 Spain. REPLACE developed a toolkit for conducting participatory action research (PAR) with  
18 communities and a behaviour change cycle framework for enabling community members to  
19 take action to end FGM[15]. Enabling community members themselves to gather data from  
20 within their communities ensured that 'research is conducted 'with' rather than 'on' the  
21 community'[15].

25 "[REPLACE is] *innovative because it focuses on behaviour change; it works directly*  
26 *with the communities, which is quite exceptional in Europe [...It is] framed in a theory of*  
27 *behaviour change, which really has a thorough methodology... and also an evaluation.*"  
28  
29 (KIF06)

32  
33 Participants identified PAR approaches generally as good practice, able to provide in-depth  
34 understanding of the interventions needed with particular communities. Participants identified  
35 a PAR initiative called Participatory Ethnographic Evaluation and Research, developed by  
36 Options and Swansea University, as "*an eye opener for a lot of the community members*"  
37 (KIF15) who recognised that FGM must be addressed in their community and went on to play  
38 key roles in other FGM interventions.

42  
43 Participants described *Ketenaapak* ('Dutch Chain Approach') in the Netherlands as  
44 particularly effective. This model was described as a '*meaningful initiative to involve*  
45 *communities in FGM prevention work and a landmark in the prevention of FGM in the*  
46 *Netherlands*[1]. In this multi-disciplinary approach, over 100 key community figures  
47 contributed to child protection and prevention through organising home visits and meetings  
48 within their communities to raise FGM awareness (KIF05). Several participants identified the  
49 *Federation of Somali Associations in the Netherlands (FSAN)* as a grassroots organisation  
50 playing an important role in identifying key figures within communities, coordinating activities,  
51 and providing training (KIF02; KIF03),  
52  
53  
54  
55  
56  
57  
58  
59  
60

1  
2  
3 The Tackling FGM Initiative (TFGMI), established in the UK in 2010, was a six-year  
4 collaboration between five funding bodies to strengthen community-based preventative  
5 work[26]. It provided many examples of good practice focused on community-led prevention  
6 and participation in activities across the UK, highlighting the crucial role of community  
7 'champions' supported by community organisations[25]. For example, a Manor Gardens  
8 training programme enabled London women and men to become paid Community  
9 Facilitators and work with healthcare professionals to organise FGM sessions (KIF18).  
10 Another example, Africa Advocacy Foundation, relied on social networks to create '*sister*  
11 *circles*' (safe spaces for women) to enable community conversations around FGM in  
12 Southeast London[25]. Safe, women-only spaces were considered important '*for women to*  
13 *discover for themselves the nature of their reality through discussions with other women*'[27],  
14 as a first step in rejecting FGM[25]. As one participant noted, '*one of the mistakes we make*  
15 *is that we assume everyone knows that FGM is harmful whereas many women from*  
16 *communities or women who have experienced FGM don't see that*' (KIF17).  
17  
18  
19  
20  
21  
22  
23  
24

### 25 *Protection*

26 The role of potentially-affected communities in protection is described under two sub-themes  
27 (i) prevention-protection linkages and (ii) effective protection.  
28  
29  
30

31 *Prevention-protection linkages:* Despite consensus that legislation and criminal justice  
32 approaches helped provide an enabling framework for prevention work, participants noted  
33 that such approaches could not succeed without a parallel focus on prevention.  
34

35 *"Given the deep-rooted cultural nature of harmful traditional practices, we can mount*  
36 *as many arrests as we possibly can [...], but unless...an affected community changes*  
37 *their thinking, then we're never going to truly...prevent or...eradicate these practices."*  
38  
39 (KIM12)  
40  
41  
42

43 Prevention and protection were described by one participant as '*two sides of the same coin,*  
44 *neither can succeed without the other*' (KIF14). However, there are recognised tensions  
45 between these approaches[1, 28]. Preventive approaches are generally more collaborative[1]  
46 and community-focused[28]. Protection approaches, whilst perhaps necessarily promoting an  
47 unequivocal message around child protection, may lead to families being viewed as potential  
48 perpetrators[1]. Several participants highlighted that culturally aggressive top-down  
49 approaches imposed on communities, without the building of trust between families and  
50 professionals, could have unwanted consequences, e.g. girls being taken abroad for FGM  
51 (KIF01)[7] or already marginalised families, pushed further from mainstream society,  
52 '*cling[ing] to their own cultures and traditions more tightly*'[28].  
53  
54  
55  
56  
57  
58  
59  
60

1  
2  
3  
4 Participants in France and the Netherlands reported some success in achieving attitudinal  
5 change and reducing FGM through a combination of prevention and protection interventions.  
6 In France, a number of high profile prosecutions and legislative measures had been  
7 accompanied by investment in training and support for professionals, as well as education  
8 and awareness-raising in schools and universities, though the role of communities was not  
9 necessarily clear within this (KIF02). In the Netherlands (i.e. *Katenapaak*), participants  
10 reported most success developing a crucial role for communities within combined prevention  
11 and protection responses (KIF05). UK approaches were criticised for failing to effectively link  
12 protection and prevention agendas and involve communities: “...efforts to reduce FGM have  
13 focused on punitive legislation without at the same time empowering women in communities  
14 to engage in debate, change attitudes and create alternative ways of affirming their cultural  
15 identity”[14]. However, describing a successful Police-led community conference, a UK  
16 participant suggested that this was shifting, with many organisations ‘*motivated by the need*  
17 *for change*’ and prepared to support the police in developing ‘*community-driven*’ solutions  
18 (KIM12).  
19  
20  
21  
22  
23  
24  
25  
26  
27

28 *Effective protection:* Participants highlighted community involvement in protection  
29 interventions in the Netherlands, UK, and Spain. UK participants noted statutory agencies  
30 involving community organisations at an earlier stage when girls were identified as at risk of  
31 FGM (KIF17, KIF18). For example, FORWARD in London and NEw STep for African  
32 Community (NESTAC) in Manchester worked alongside authorities to deliver family  
33 education sessions, overcoming language and cultural barriers to strengthen engagement  
34 (KIF18). In Bristol, social services increased the capacity of community organisations to take  
35 on ‘safeguarding’ roles, working together to ensure common understandings of risk (KIF18).  
36  
37  
38  
39  
40

41 However, some participants expressed reservations about communities’ role in protection  
42 interventions, suggesting that statutory agencies passing on risk management responsibility  
43 to community organisations was risky (EG1; KIF18). Another noted that community  
44 organisations with experience of case management, e.g. around violence against women or  
45 asylum-seekers, could better manage the complexities of taking on a protection role[25]. A  
46 participant described the value of joint-working, in building community confidence to report  
47 concerns.  
48  
49  
50

51 *“If there is a cutter in the community, the chances are higher that the community*  
52 *members would be aware of it than a professional...we need to work with*  
53 *communities to train them and empower them...so they can report for themselves.”*  
54 (KIF17)  
55  
56  
57  
58

1  
2  
3  
4 Other examples included developing tools to support protection of individual women and  
5 girls. The Dutch Government produced a passport-sized declaration, signed by a range of  
6 community and non-community organisations, stating that FGM is forbidden and punishable  
7 by a prison sentence and loss of rights to residency, which families can carry when travelling  
8 overseas (KIF05). A Spanish region produced a similar official letter for families travelling  
9 abroad (KIF01). Participants highlighted the need for such tools to be developed in  
10 partnership with communities, as in the Netherlands. UK participants noted that when a  
11 similar tool was developed by the UK Government, communities did not feel ownership of it,  
12 lessening its impact (KIF15).  
13  
14  
15  
16  
17  
18

### 19 *Provision*

20 The role of potentially-affected communities in services provision is described under two sub-  
21 themes: (i) provision roles and (ii) facilitating access.  
22  
23  
24

25 *Provision roles:* Participants identified community organisations across Europe providing  
26 services from advocacy to psychological support, e.g. Daughters of Eve, FORWARD, FSAN,  
27 and GAMS - the *Groupe pour l'Abolition des Mutilations Sexuelles* (KIF03; KIF06, KIF15;  
28 KIF17). Fewer examples existed of community organisations influencing the planning, design  
29 or delivery of services, although participants concurred on the need for this (KIF17; KIF15;  
30 KIF18).  
31  
32  
33

34 *"If communities are involved they can tell what kind of services they require, rather*  
35 *than...you know coming from top down, where they make assumptions."* (KIF17)  
36  
37

38 *Facilitating access:* Although community organisations seldom delivered clinical services,  
39 they had an important role in facilitating women's engagement *"to understand why that*  
40 *service exists and... taking the time to explain it ...which is something that many health*  
41 *providers don't have the time to do"* (KIF17). UK participants described community  
42 involvement in developing and delivering specialist services (KIF15; KIF18). For example, an  
43 FGM clinic in Bristol was developed in response to lobbying from women who were involved  
44 in its design and sat on its steering group (KIF18). A London project, developed to support  
45 women failing to attend specialist appointments at an FGM clinic, involved community  
46 members calling/meeting clients to explain appointments, which improved services uptake  
47 (KIF18).  
48  
49  
50  
51  
52  
53

54 In response to such barriers as a reluctance to disclose FGM to health professionals (KIF05),  
55 a fear of being criminalised (KIF17), or a lack of trust (KIF18), compounded by health  
56  
57  
58

1  
2  
3 providers' own discomfort and reluctance to initiate discussions around FGM[29], community  
4 organisations and members were regarded as having a key role in facilitating access to  
5 services. Participants identified an example of a service employing outreach workers from  
6 the community who take on a 'mediating role' (KIF18). In another example, the Dutch  
7 Government funded a community organisation to implement an awareness raising campaign  
8 to get information to women about services available to them (KIF05). Another participant  
9 described a more informal role.

10  
11  
12  
13 *"I often get people phoning me asking for advice and support... A lot of women would*  
14 *say that they don't want to ask someone outside [...] So we need... a way... to give*  
15 *confidence to women to be able to speak to their GP or health visitor about their fear of*  
16 *FGM without feeling criminalised."* (KIF17)  
17  
18  
19

20 Many participants highlighted the gap between communities and statutory agencies and the  
21 need for engagement models that facilitated improved trust, confidence, and access (KIF15;  
22 KIF15; KIF18; KIF17; KIF08).  
23  
24  
25

### 26 *Participation*

27 The role of potentially-affected communities in participation interventions is described under  
28 four sub-themes: (i) communities' vital role, (ii) engagement and representativeness, (iii)  
29 involvement in campaigns, and (iv) the value of a clear and inclusive national strategy.  
30  
31  
32

33  
34 *Vital role:* Literature and interview sources highlighted that empowering affected communities  
35 was the only way to end FGM[7, 12, 13, 23]. All participants emphasised the key role of  
36 potentially-affected communities, indicating it was vital to ensure interventions were informed  
37 by the experiences, needs and views of those affected by FGM.  
38  
39

40 *'Anything around FGM needs to be championed and developed with people affected at*  
41 *the centre and leading the work.'* (CG1)  
42  
43

44 Supporting and enabling community organisations to participate in policy-making was  
45 identified as essential.  
46

47 *'Finding ways and mechanisms to give [community organisations] that capacity, the*  
48 *framework and leverage for them to be heard [is] very important because I don't*  
49 *believe we can effectively abandon FGM in Europe [...] if those communities are not*  
50 *the ones...acting for the abandonment of FGM. It's a very important role and only they*  
51 *can actually do it.'* (KIF10)  
52  
53  
54  
55  
56  
57  
58  
59  
60

1  
2  
3 *Engagement and representativeness:* Despite consensus on its value, most participants said  
4 insufficient efforts were made by policy-makers and practitioners to engage with communities  
5 (KIF06; KIF01; KIF07; KIF17; KIF18). This was particularly evident in the UK, with existing  
6 approaches described as *'piecemeal'* (KIF15) and *'tokenistic'* (KIF17; KIF18). Community  
7 participants cited examples of being excluded or included at the last minute to *'tick a box'*  
8 (KIF17) or when statutory professionals had a crisis (KIF18). In contrast, engagement in the  
9 Netherlands was described as *'active'* (KIF05; KIF18).

10  
11  
12  
13 *'I don't think there's any such thing as a hard-to-reach group. I think there's*  
14 *something called 'failed-to-reach groups by the statutory agencies' because there'll*  
15 *always be individuals or an organisation who'll get you access to affected*  
16 *communities.'* (KIM12)

17  
18  
19  
20 Participants noted a tendency of UK decision-makers to engage with the same handful of  
21 individuals as *'leaders'* or *'spokespeople'* (KIF18). One highlighted the difference between  
22 enabling individual community members to participate and working with community  
23 organisations.  
24

25  
26 *"[Community organisations] are bringing more than just their personal opinion, they*  
27 *tend... to be engaging more widely with the community and so can be a channel to*  
28 *have these voices heard."* (KIF18)

29  
30  
31  
32 Representativeness appeared to be a particular challenge for countries newer to FGM issues  
33 (e.g. Portugal) as community organisations might not yet exist around this issue or have  
34 confidence and advocacy experience (KIF18). Thus, whether effective or *'active'* participation  
35 was achieved appeared to vary between - and sometimes within – countries, potentially  
36 depending on whether decision-makers valued community organisations.  
37

38  
39 *"It depends... whether the local authority [...] values community interventions and*  
40 *whether they see the community as a problem and... statutory professionals as the*  
41 *answer...or whether [the local authority] views the community as part and parcel of*  
42 *[...] the solution."* (KIF18)

43  
44  
45  
46  
47 UK participants noted that most FGM work occurred in silos, further challenging effective  
48 participation. Interventions focused solely on FGM failed to account for *'gendered social*  
49 *norms... and nature of women's lives'* (KIF15)[30]. Participants indicated that separating  
50 FGM from issues like domestic violence was a major problem.  
51

52  
53 *"They are seen as completely separate topics or discrete topics as opposed to how*  
54 *do these principles cut across the way we navigate our communities and navigate our*  
55 *spaces."* (KIF18)

1  
2  
3  
4 *Campaigns:* Several participants said that communities played an important role in  
5 campaigning and awareness-raising. The Europe-wide End FGM Campaign led by Amnesty  
6 International Ireland and the lobbying work of GAMS, a large French NGO founded in 1982  
7 by women of African and Western origin, were highlighted (KIF02). Others spoke of the  
8 important work of high profile survivor-campaigners, such as Layla Hussein in the UK  
9 (KIF07). One participant talked about her own role as a community campaigner in '*raising*  
10 *awareness through fashion...music and culture nights*' and '*campaigning, lobbying and*  
11 *working with the government*' (KIF07).  
12  
13  
14  
15

16  
17  
18 *Strategy:* Several participants noted that addressing FGM required strong strategic  
19 frameworks. Most suggested this should be a resourced, standalone, multi-agency, national  
20 action plan, developed in partnership with key stakeholders, including affected communities:  
21

22 *"Authorities should... design a plan of action on FGM and...attach a budget to it and [it]*  
23 *should not only be developed by officials in their offices but in collaboration with the*  
24 *communities themselves and with all stakeholders."* (KIF06)  
25  
26  
27

28 At least eight European countries had developed national FGM action plans by 2013[1] and  
29 Scotland did so in 2016[31]. There were very few examples across Europe of communities  
30 having a role in strategy development or being supported to influence policy and practice.  
31 The Finnish National Action Plan provided an example of community engagement, as it was  
32 developed by a working group of government ministries and African women's  
33 organisations[1]. Scotland's national action plan incorporated clear actions on community  
34 participation, but participants noted limited engagement with communities in its development  
35 (KIF17) and a general absence of community voices in the policy arena in Scotland (CG1;  
36 CG2; KIF17). Participants in several European countries noted disconnects between policy  
37 and reality.  
38

39 *"One thing we're missing which is the reality for many European countries, is the*  
40 *grassroots... There's a lot of awareness and there's a lot of policy but somehow we don't*  
41 *understand what's happening at the grass roots."* (KIF07)  
42  
43  
44  
45  
46  
47  
48

### 49 ***Barriers to community participation***

50 The main barriers identified to effective work with communities were: (i) cultural, i.e. within  
51 communities; (ii) structural, i.e. external to communities; and (iii) sustainability-related.  
52  
53

54 *Cultural:* Leadership of FGM work is not easy and participants described the importance of  
55 supporting community-members taking on such roles, e.g. through training, information, and  
56  
57  
58

1  
2  
3 access to services (KIF05; KIF13; KIF13). Negative consequences for community leaders or  
4 activists have been documented[32], including verbal abuse, criticism, threats, and family  
5 conflict (KIF05; KIF04; KIF17).  
6

7 *“I’ve had people from my community who have sent me...hate messages, saying...  
8 what you’re doing is wrong. And I’ve had family-members who have said that they  
9 will no longer speak to me... and that I... bring shame on them. It’s not... easy for me  
10 to take on this role. Trust me, there were times when I almost gave up” (KIF17)*  
11  
12  
13

14 Women may worry about bringing shame on their communities or experience shame or guilt  
15 if they speak about FGM to service providers or other ‘outsiders’ (KIF17; KIF16)[33],  
16 particularly as some communities are explicitly told not to speak about FGM (KIF17). Trust-  
17 related barriers were thus common between communities and professionals (KIF07; KIF04),  
18 particularly within child protection (KIF18) or health services, where usage of interpreters  
19 could compound trust issues (KIF16; KIF17). Taking time to build trust was therefore deemed  
20 important  
21  
22  
23  
24

25 *‘It’s not a case of turning up with knowledge, but of starting off with the knowledge of  
26 communities themselves, then building something together’ (KIF02)*  
27  
28

29 Gender norms and power dynamics within potentially-affected communities were identified  
30 as potential barriers, with several participants highlighting the importance of working with  
31 men and women separately before bringing them together if appropriate (KIF04; KIF07).  
32 While gender oppression was a structural barrier experienced by women globally, “*its  
33 manifestation differs according to culture, country and social grouping*”[27], thus affecting  
34 which avenues were open to women to challenge or engage with FGM and other aspects of  
35 their lives[30, 34].  
36  
37  
38  
39  
40

41 *Structural:* Lack of understanding among professionals of the value and potential role of  
42 communities was highlighted as a key barrier to their involvement in interventions. Key  
43 decision-makers and service providers would need to change the ways in which they work to  
44 ensure that communities were actively involved and heard. One participant provided an  
45 example of statutory professionals in Bristol who developed alternative ways of engaging  
46 with communities including attending community events, holding informal consultations, and  
47 making meetings and meeting space more equitable and community friendly (KIF18). Lack of  
48 compensation for travel and childcare expenses was cited as a barrier by several  
49 participants, including a lack of understanding by some professionals of why such expenses  
50 would even be required (KIF06; KIF17; KIF18).  
51  
52  
53  
54  
55

56 *‘It still feels like there is a need to explain the added value of communities to the*  
57  
58  
59  
60

1  
2  
3 *powers that be.'* (KIF18)  
4

5  
6 *Sustainability:* Participants in different contexts raised concerns about the sustainability of  
7 FGM interventions, particularly those at community level that required long-term investment.  
8 Some indicated that although community-led organisations were often approached for their  
9 expertise, they were rarely funded for this advisory role (KIF15) and that significant  
10 government funding was needed (KIF06; KIF15). Others highlighted the need for longer-term  
11 investment in implementation and action beyond developing protocols, frame-works, and  
12 action plans (KIF15; KIF03). Several noted that much of the work of community organisations  
13 was not financially valued, with one participant stressing how important it was to recognise  
14 the challenging nature of this work, which is '*under-valued and under-resourced*', and  
15 questioning how long community members could continue to volunteer in such challenging  
16 roles (KIF15).  
17  
18  
19  
20  
21  
22

## 23 **Discussion**

### 24 *Principle findings*

25  
26 Clear consensus emerged that potentially-affected communities should have a role in all  
27 intervention areas and that this was vital to addressing FGM in Europe[1, 15, 25]. Despite  
28 this consensus and several examples of good practice (e.g. EU-funded REPLACE and  
29 REPLACE 2 programmes, Dutch *Ketenaapak*, the Tackling FGM Initiative), community roles  
30 remained inconsistent in FGM interventions and often non-existent in FGM policy  
31 development.  
32  
33  
34  
35

36  
37 Practices ranged from good examples of support for community-led interventions and  
38 partnership work with communities to less positive examples of tokenism and non-  
39 participation. Most FGM interventions across Europe focused on awareness-raising, and  
40 despite examples of good practice noted above, community participation appeared fairly  
41 minimal[1, 15]. The extent of community participation was inconsistent between and within  
42 countries. While community participation was accepted as vital, participants noted that  
43 practices associated with community participation varied enormously. This corresponded  
44 with the significant literature highlighting challenges inherent in increasing community  
45 participation, e.g. what level of participation[35, 36], '*who participates, in what, and for whose*  
46 *benefit*[37], and to what extent government organisations that engage with communities  
47 could change to develop truly participatory processes and spaces[38].  
48  
49  
50  
51  
52  
53

54  
55 The role of communities appeared most developed within prevention interventions, with good  
56 practice examples of both community-led initiatives and partnership. Protection-focused  
57  
58

1  
2  
3 approaches were more challenging in terms of participation, as the clear child-protection  
4 focus could stigmatise families[1, 7]. Community participation within safeguarding varied,  
5 with examples of both effective and emerging roles. Individuals and organisations had roles  
6 in building trust and bridging gaps between communities and authorities, though  
7 responsibility for managing risk should remain firmly with statutory bodies[25]. While several  
8 community-led organisations delivered a range of services, few examples were found of  
9 communities participating in designing, delivering or evaluating statutory services. Good  
10 practice examples were identified of community organisations or activists playing a key role  
11 in facilitating services access and enabling dialogue within communities to occur[25].  
12  
13  
14  
15

### 16 17 *Implications for policy and practice*

18 Engaging potentially-affected communities in coordinated multi-agency responses appears  
19 critical to the success of FGM policies and interventions in Europe. Decision-makers and  
20 service providers should invest in community engagement by (i) ensuring that community  
21 organisations can participate actively in future interventions and (ii) addressing cultural,  
22 structural, and sustainability-related barriers to participation.  
23  
24  
25  
26

27  
28 Supporting and strengthening community organisations can improve engagement. Bottom-up  
29 approaches that enable dialogue within communities appear most successful. Community  
30 development support could enable potentially-affected communities to identify their own  
31 FGM-related concerns and aspirations and work collectively to identify solutions and take  
32 action. This requires long-term investment in community development support and  
33 community organisations themselves, to support community-led interventions and  
34 meaningful engagement between communities and policy-makers. Any engagement with  
35 communities must begin with identifying those communities potentially affected,  
36 acknowledging that communities are not homogenous, and engaging with a wide range of  
37 groups and community representatives across nationalities and ethnicities. As most women  
38 and girls affected by FGM also identify as people of colour, perspectives and lived  
39 experiences must be included in development of meaningful policies and services.  
40  
41  
42  
43  
44  
45  
46

47 Research on FGM interventions across Europe is limited, when compared to levels of  
48 activism. Research has focused on clinical care, provision of health services, and attitudes  
49 towards FGM. Minimal investigation has been conducted on the role of diaspora  
50 communities and their contributions to challenging and responding to FGM. Empowerment,  
51 engagement, and participation are frequently mentioned, but rarely critically examined, with  
52 little discussion about how to move beyond rhetoric towards putting these concepts into  
53 practice. Further research with communities, including participatory methods, appears  
54  
55  
56  
57  
58  
59

1  
2  
3 warranted. Any such research should include the voices of affected women and girls, as  
4 those best able to describe their lived experiences and needs and to contribute to the  
5 additionally sensitive topics of prosecution and redress.  
6  
7

### 8 *Limitations*

9  
10 This study had three significant limitations. First, this study was exploratory and participant  
11 numbers were limited due to time and resource constraints. Second, numbers of participants  
12 from potentially-affected communities were limited and further community engagement is  
13 needed to expand on issues raised. Finally, focus on European interventions ignored the  
14 successfully designed and implemented African interventions, e.g. TOSTAN  
15 ([www.tostan.org](http://www.tostan.org)) that offer international benchmarks for changing attitudes and reducing  
16 FGM[21].  
17  
18  
19  
20  
21

### 22 **Conclusion**

23 Exploring the role of communities within interventions to address FGM in Europe allowed  
24 critical examination of how crucial community voices remain marginalised and could be  
25 better heard and supported. “*Without an effective commitment to the participation and*  
26 *empowerment of potentially-affected communities, policy-makers and practitioners will not*  
27 *identify the actual risks experienced by diaspora girls and women in Europe or develop*  
28 *effective interventions, and risk further marginalising those community voices that are the*  
29 *most effective advocates for change*”[6]. Results demonstrate that it is possible to work  
30 alongside potentially-affected communities, benefitting from community perspectives and  
31 expertise, to develop meaningful partnerships and support community-led interventions.  
32  
33  
34  
35  
36  
37

### 38 **Declarations**

#### 39 *Conflict of interest*

40 None declared.  
41  
42  
43

#### 44 *Author contributions*

45 EC contributed to study design, data collection and analysis and drafted the manuscript. NM  
46 contributed to study design, data analysis, and manuscript writing. HB contributed to study  
47 design, data collection and analysis, and critically reviewed the manuscript. NH contributed  
48 to study design and data interpretation and critically revised the manuscript. All authors  
49 approved the version for submission.  
50  
51  
52  
53

#### 54 *Acknowledgements*

55 Special thanks to all key informants, particularly women from potentially-affected  
56  
57  
58  
59  
60

1  
2  
3 communities, for their invaluable insights.

#### 4 5 6 *Funding*

7 This work was supported by the Scottish Government Equality Fund and Rosa FGM Small  
8 Grants Programme for funding research.  
9

#### 10 11 12 *Data sharing*

13 Anonymised dataset and coding are available on request in accordance with LSHTM  
14 institutional data management policy.  
15

#### 16 17 18 **References**

- 19 1. EIGE, *Female genital mutilation in European Union and Croatia*. 2013, Belgium:  
20 European Institute for Gender Equality.
- 21 2. Kaplan, A., et al., *Female genital mutilation/cutting in The Gambia: long-term health*  
22 *consequences and complications during delivery and for the newborn*. Int J Womens  
23 Health, 2013. **5**: p. 323-31.
- 24 3. Kaplan, A., et al., *Health consequences of female genital mutilation/cutting in the*  
25 *Gambia, evidence into action*. Reprod Health, 2011. **8**: p. 26.
- 26 4. Leye, E., et al., *Towards a better estimation of prevalence of female genital mutilation*  
27 *in European Union: interpreting existing evidence in all EU Member States*. Genus,  
28 2014. **LXX**(1): p. 99-121.
- 29 5. UNICEF, *Female Genital Mutilation/Cutting: A Statistical overview and exploration of*  
30 *the dynamics of change*. 2013, New York: UNICEF.
- 31 6. Baillot, H., et al., *Tackling Female Genital Mutilation in Scotland: A Scottish model of*  
32 *intervention* 2014, Scottish Refugee Committee; LSHTM: Glasgow.
- 33 7. Gele, A.A., E.B. Johansen, and J. Sundby, *When female circumcision comes to the*  
34 *West: attitudes toward the practice among Somali Immigrants in Oslo*. BMC Public  
35 Health, 2012. **12**: p. 697.
- 36 8. Hemmings, J., *The FGM Initiative: interim report*. 2011, Options UK, Esmee Fairbairn  
37 Foundation, Rosa, Trust for London: London.
- 38 9. Shaw, M., *Community Work Today: Competing Demands in Practice*. Concept, 2013.  
39 **4**(2).
- 40 10. CDNOS, *Community Development National Occupational Standards*. 2015: London.
- 41 11. Berg, R.C. and E. Denison, *A tradition in transition: factors perpetuating and*  
42 *hindering the continuance of female genital mutilation/cutting (FGM/C) summarized in*  
43 *a systematic review*. Health Care Women Int, 2013. **34**(10): p. 837-59.
- 44 12. Costello, S., et al., *In the Best Interests of the Child: Preventing Female Genital*  
45 *Cutting (FGC)*. British Journal of Social Work, 2013: p. 1–18.
- 46 13. Isman, E., C. Ekeus, and V. Berggren, *Perceptions and experiences of female genital*  
47 *mutilation after immigration to Sweden: an explorative study*. Sex Reprod Healthc,  
48 2013. **4**(3): p. 93-8.
- 49 14. Dustin, M., *Female Genital Mutilation/Cutting in the UK: Challenging the*  
50 *Inconsistencies*. European Journal of Women's Studies, 2010. **17**(7).
- 51 15. Brown, K., D. Beecham, and H. Barrett, *The Applicability of Behaviour Change in*  
52 *Intervention Programmes Targeted at Ending Female Genital Mutilation in the EU:*  
53 *Integrating Social Cognitive and Community Level Approaches*. Obstet Gynecol Int,  
54 2013. **2013**: p. 324362.  
55  
56  
57  
58  
59  
60

16. Norman, K., et al., *FGM is always with us. Experiences, Perceptions and Beliefs of Women Affected by Female Genital Mutilation in London: Results from a PEER Study*. 2009, Options Consultancy Services and FORWARD: London.
17. Johnsdotter, S., *The Impact of Migration on Attitudes to Female Genital Cutting and Experiences of Sexual Dysfunction Among Migrant Women with FGC*. *Curr Sex Health Rep*, 2018. **10**(1): p. 18-24.
18. Johnsdotter, S., et al., "Never my daughters": a qualitative study regarding attitude change toward female genital cutting among Ethiopian and Eritrean families in Sweden. *Health Care Women Int*, 2009. **30**(1-2): p. 114-33.
19. Scottish Government, *Safer Lives: Changed Lives: A Shared Approach to Tackling Violence Against Women in Scotland*. 2009, Edinburgh: COSLA.
20. Council of Europe, *Convention on preventing and combatting violence against women and domestic violence*. 2011: <http://www.refworld.org/docid/4ddb74f72.html>.
21. Baillot, H., et al., *Addressing female genital mutilation in Europe: a scoping review of approaches to participation, prevention, protection, and provision of services*. *Int J Equity Health*, 2018. **17**(1): p. 21.
22. Tong, A., P. Sainsbury, and J. Craig, *Consolidated criteria for reporting qualitative research (COREQ): a 32-item checklist for interviews and focus groups*. *Int J Qual Health Care*, 2007. **19**(6): p. 349-57.
23. Khaja, K., et al., *Female genital cutting: African women speak out*. *International Social Work*, 2009. **52**(5): p. 1-15.
24. Reig Alcaraz, M., J. Siles Gonzalez, and C. Solano Ruiz, *Attitudes towards female genital mutilation: an integrative review*. *Int Nurs Rev*, 2014. **61**(1): p. 25-34.
25. Khalifa, S. and E. Brown, *Communities Tackling FGM in the UK: Best Practice Guide*. 2016, the Tackling Female Genital Mutilation Initiative and Options Consultancy Services Ltd: London.
26. Brown, E. and C. Porter, *The Tackling FGM Initiative: Evaluation of the Second Phase (2013–2016)*. 2016, Options Consultancy Services Ltd, Trust for London, Esmee Fairbairn Foundation, Rosa, Comic Relief: London.
27. Dominelli, L., *Women in the community: feminist organising principles and organising in community work*. *Community Development Journal*, 1995. **30**(2): p. 133-143.
28. Berer, M., *The history and role of the criminal law in anti-FGM campaigns: Is the criminal law what is needed, at least in countries like Great Britain?* *Reprod Health Matters*, 2015. **23**(46): p. 145-57.
29. Abdulcadir, J., et al., *Missed opportunities for diagnosis of female genital mutilation*. *Int J Gynaecol Obstet*, 2014. **125**(3): p. 256-60.
30. Chai, X., et al., *Married women's negotiation for safer sexual intercourse in Kenya: Does experience of female genital mutilation matter?* *Sex Reprod Healthc*, 2017. **14**: p. 79-84.
31. Scottish Government, *Scotland's National Action Plan to Prevent and Eradicate female genital mutilation (FGM) 2016-2020*. 2016, COSLA: [www.gov.scot/Resource/0049/00493752.pdf](http://www.gov.scot/Resource/0049/00493752.pdf).
32. Behrendt, A., *Listening to African Voices. Female Genital Mutilation/Cutting among Immigrants in Hamburg: Knowledge, Attitudes and Practice*. 2011, Plan International Deutschland e.V: Hambourg.
33. Vloeberghs, E., et al., *Coping and chronic psychosocial consequences of female genital mutilation in The Netherlands*. *Ethn Health*, 2012. **17**(6): p. 677-95.
34. Mpofu, S., et al., *The relation of female circumcision to sexual behavior in Kenya and Nigeria*. *Women Health*, 2017. **57**(7): p. 757-774.
35. Arnstein, S.R., *A Ladder Of Citizen Participation*. *Journal of the American Institute of Planners*, 1969. **35**(4): p. 216-224.
36. Cornwall, A., *Unpacking 'Participation': models, meanings and practices*. *Community Development Journal* 2008. **43**(1): p. 269–283.

- 1  
2  
3 37. Cornwall, A. and A. Rivas, *From 'gender equality and 'women's empowerment' to*  
4 *global justice: reclaiming a transformative agenda for gender and development*. Third  
5 World Quarterly, 2015. **36**(2): p. 396-415.  
6 38. Eversole, R., *Remaking Participation: challenges for community development*  
7 *practice*. Community Development Journal, 2012. **47**(1): p. 29-41.  
8 39. UNICEF, *Female Genital Mutilation/Cutting: A Global Concern*. 2016, UNICEF:  
9 [https://www.unicef.org/media/files/FGMC\\_2016\\_brochure\\_final\\_UNICEF\\_SPREAD.p](https://www.unicef.org/media/files/FGMC_2016_brochure_final_UNICEF_SPREAD.pdf)  
10 [df](https://www.unicef.org/media/files/FGMC_2016_brochure_final_UNICEF_SPREAD.pdf).  
11  
12  
13  
14  
15  
16  
17  
18  
19  
20  
21  
22  
23  
24  
25  
26  
27  
28  
29  
30  
31  
32  
33  
34  
35  
36  
37  
38  
39  
40  
41  
42  
43  
44  
45  
46  
47  
48  
49  
50  
51  
52  
53  
54  
55  
56  
57  
58  
59  
60

For peer review only

## Tables

### Table 1. Key definitions

|                                |                                                                                                                                                                                                                                                                                                                                                                                                                                                                                                                                                                                                                                                                             |
|--------------------------------|-----------------------------------------------------------------------------------------------------------------------------------------------------------------------------------------------------------------------------------------------------------------------------------------------------------------------------------------------------------------------------------------------------------------------------------------------------------------------------------------------------------------------------------------------------------------------------------------------------------------------------------------------------------------------------|
| Female genital mutilation      | All procedures that involve partial or total removal of the female external genitalia, or other injury to the female genital organs for non-medical reasons (WHO, 2016)                                                                                                                                                                                                                                                                                                                                                                                                                                                                                                     |
| Community                      | A community of identity has a common bond based on ' <i>geography, identity or interest</i> ' [10]                                                                                                                                                                                                                                                                                                                                                                                                                                                                                                                                                                          |
| Community development          | Community development enables people to work collectively to bring about positive social change. This long-term process starts from people's own experience and enables communities to work together to: <ul style="list-style-type: none"> <li>• identify their own needs and actions;</li> <li>• take collective action using their strengths and resources;</li> <li>• develop their confidence, skills and knowledge;</li> <li>• challenge unequal power relationships;</li> <li>• promote social justice, equality and inclusion;</li> </ul> to improve the quality of their own lives, the communities in which they live and societies of which they are a part [10] |
| Participation                  | Policy-making and practice development around violence against women is shaped by the experiences, needs and views of those affected by FGM [6]                                                                                                                                                                                                                                                                                                                                                                                                                                                                                                                             |
| Potentially-affected community | A diaspora community from one of 29 countries identified by UNICEF, in which FGM practices are concentrated, i.e. Somalia 98%, Guinea 96%, Djibouti 93%, Egypt 91%, Eritrea 89%, Mali 89%, Sierra Leone 88%, Sudan 88%, Gambia 76%, Burkina Faso 76%, Ethiopia 74%, Mauritania 69%, Liberia 66%, Guinea-Bissau 50%, Chad 44%, Cote d'Ivoire 38%, Kenya 27%, Nigeria 27%, Senegal 26%, CAR 24%, Yemen 23%, Tanzania 15%, Benin 13%, Iraq 8%, Ghana 4%, Togo 4%, Niger 2%, Cameroon 1%, Uganda 1% [5, 39]                                                                                                                                                                     |
| Prevention                     | Interventions intended to create and/or sustain behavioural and attitudinal change within affected communities [6]                                                                                                                                                                                                                                                                                                                                                                                                                                                                                                                                                          |
| Protection                     | Interventions intended to protect the individual rights of women and girls who are at risk of or have experienced FGM [6]                                                                                                                                                                                                                                                                                                                                                                                                                                                                                                                                                   |
| Service provision              | Service responses to survivors of FGM [6]                                                                                                                                                                                                                                                                                                                                                                                                                                                                                                                                                                                                                                   |

**Table 2. Participant characteristics**

| ID    | Role/Title                                | Location        | Interview type   |
|-------|-------------------------------------------|-----------------|------------------|
| KIF01 | University professor                      | Spain (Skype)   | KII              |
| KIF02 | NGO worker                                | France          | KII              |
| KIF03 | NGO worker                                | Netherlands     | KII              |
| KIF04 | Teacher                                   | England         | KII              |
| KIF05 | Government minister                       | Netherlands     | KII              |
| KIF06 | University professor                      | Belgium         | KII              |
| KIF07 | Community activist                        | Ireland (Skype) | KII              |
| KIF08 | Medical professional                      | England         | KII              |
| KIF09 | University professor                      | France          | KII              |
| KIF10 | INGO worker                               | EU              | KII              |
| KIF11 | Solicitor                                 | Scotland        | KII              |
| KIM12 | Police officer                            | England         | KII              |
| KIF13 | Police officer                            | England         | KII              |
| KIF14 | Legal professional                        | France          | KII (unrecorded) |
| KIF15 | NGO worker                                | England         | KII              |
| KIF16 | Medical professional                      | Scotland        | KII              |
| KIF17 | Community activist                        | Scotland        | KII              |
| KIF18 | Community activist                        | Scotland        | KII              |
| EG1   | 9 policy/practice participants            | Scotland        | Group interview  |
| EG2   | 9 policy/practice/community participants  | Scotland        | Group interview  |
| EG3   | 10 policy/practice/community participants | Scotland        | Group interview  |
| CG1   | 4 community activists                     | Scotland        | Group interview  |
| CG2   | 4 community activists                     | Scotland        | Group interview  |

1  
2  
3 **Missing from the debate? A qualitative study exploring the role of communities within**  
4 **interventions to address female genital mutilation in Europe**  
5  
6

7 Elaine Connelly<sup>1</sup>, Nina Murray<sup>1</sup>, Helen Baillot<sup>1</sup>, Natasha Howard<sup>2§</sup>  
8  
9

10 §Corresponding author  
11  
12

13 <sup>1</sup> Scottish Refugee Council, Portland House, 17 Renfield St, Glasgow G2 5AH  
14

15 <sup>2</sup> London School of Hygiene and Tropical Medicine, Department of Global Health and  
16 Development, 15-17 Tavistock Place, London WC1H 9SH  
17  
18

19 EC: [econnelly@mail.com](mailto:econnelly@mail.com)

20 NM: [nina@ninamurray.uk](mailto:nina@ninamurray.uk)

21 HB: [helen@hmbaillot.co.uk](mailto:helen@hmbaillot.co.uk)

22 NH: [natasha.howard@lshtm.ac.uk](mailto:natasha.howard@lshtm.ac.uk)  
23  
24  
25

26 **Key words**  
27

28 FGM, female genital cutting, community development, Europe  
29  
30  
31  
32  
33  
34  
35  
36  
37  
38  
39  
40  
41  
42  
43  
44  
45  
46  
47  
48  
49  
50  
51  
52  
53  
54  
55  
56  
57  
58  
59  
60

## Abstract

### *Introduction*

Public attention on female genital mutilation in diaspora communities is increasing in Europe, as health and social welfare implications become better understood. This study explored the role of potentially-affected communities within interventions to address female genital mutilation in Europe, **examining current practices, promising interventions, and remaining gaps.**

### *Methods*

A qualitative study design incorporated 18 individual key informant interviews and five semi-structured group interviews with policy-makers, service providers, and community representatives. Data were analysed thematically, guided by the Scottish Government '4Ps' framework for addressing violence against women and girls, i.e. prevention, protection, provision of services, **and participation.**

### *Results*

Participants emphasised both the importance of community participation and the lack of consistent engagement by policy-makers and practitioners. All indicated that communities had a key role, though **most** interventions focussed on awareness-raising rather than community empowerment, behaviour change, or influence on the design, delivery, and/or evaluation of interventions.

### *Conclusions*

Despite clear consensus around the need to engage, support, and empower potentially-affected communities and several examples of meaningful community participation in addressing female genital mutilation (**e.g. REPLACE, REPLACE 2, Ketenaapak, Tackling FGM Initiative**), the role of communities remains inconsistent and further engagement efforts are necessary.

### **Strengths and limitations**

- This study was exploratory and participant numbers were limited, including members of potentially-affected communities, due to time and resource constraints.
- Study focus was on European interventions, thus excluding many innovative and successful African interventions.
- Nevertheless, this study is a rare effort to examine the under-researched role of diaspora communities in initiatives to address female genital mutilation in Europe, drawing from in-depth and semi-structured key informant interviews.

## Introduction

Female genital mutilation (FGM), a practice, defined in Table 1, that expresses '*deeply entrenched gender inequalities, grounded in a mix of cultural, religious and social facts inherent within patriarchal families and communities,*' is recognised internationally as a violation of the fundamental rights of women and girls and a serious form of gender-based violence[1]. Health implications of FGM are wide-ranging and well-established. Immediate health consequences include shock, haemorrhage, infection, and psychological trauma, while long-term risks include chronic pain, infections, cheloids, primary infertility, urogenital complications, birth complications, and danger to newborns[2, 3]. Though sometimes referred to as 'cutting' or 'female circumcision', this article uses 'FGM' to acknowledge the harm to women and communities.

Data indicate the existence of large communities potentially-affected by FGM in many European countries[1, 4]. For example, 23,979 people born in one of 29 'FGM-practising countries'[5], were living in Scotland in 2011[6]. However, attempts to estimate numbers of women and girls who have undergone or are at risk of FGM in diaspora communities in Europe have proven difficult due to data limitations and lack of agreement on prevalence estimation methods[4]. Additionally, the extent to which migration experiences may change attitudes and practices remains under-researched[7]. This article uses the term 'potentially-affected communities' to avoid presumptions attached to 'FGM practising communities' that may be inaccurate in a migratory context[8].

The concept of community is not straightforward, with a range of contradictory and related meanings used on all sides of the political spectrum[9]. Often defined by geography, interest, or identity, communities are not homogenous or static but rather diverse, dynamic, and multifaceted entities[10]. This article primarily describes communities of identity, where the common bond is often nationality, ethnicity, and the experience of exile, although some may also be issue-based or geographical.

FGM is described as a '*tradition in transition*'[11], with some experts asserting that empowering affected communities will lead to its elimination[7, 12, 13]. Public, media, and political attention on FGM in diaspora communities within Europe has increased, but often focuses on criminal justice and child protection[14]. While many European countries have enacted legislation and policy initiatives, the role of communities in interventions addressing FGM remains limited[1, 14]. Little research has been conducted on the role of communities in FGM interventions and very few have been rigorously evaluated[15]. Thus, community

1  
2  
3 voices are generally missing from FGM policy debates and partnerships, despite growing  
4 consensus that communities are key in addressing FGM[16]. Working with potentially-  
5 affected communities may provide a key opportunity, as the process of migration and exile  
6 allows communities to reflect, question, and debate traditional beliefs[17, 18].  
7  
8  
9

10 This study aimed to explore the role of communities within interventions to address FGM in  
11 Europe, describing perspectives of practitioners, activists, and community representatives on  
12 current practices, promising interventions, and gaps that should be addressed. Findings are  
13 presented using the Scottish Government's 4Ps framework (i.e. prevention, protection,  
14 provision of services, participation) described in its strategic approach to tackling violence  
15 against women[19]. This approach reflects and builds upon European level work, e.g. the  
16 European Institute for Gender Equality identifies five focus areas (i.e. prevalence, prevention,  
17 protection, prosecution, provision of services) as does the Due Diligence Standard of the  
18 Istanbul Convention (i.e. prevent, protect, prosecute and punish, provide services and  
19 redress) that was signed by 47 countries with FGM interventions[1, 20]. Thus, themes have  
20 relevance for policy-makers, researchers, community development practitioners, and  
21 professionals working with potentially-affected communities.  
22  
23  
24  
25  
26  
27  
28

## 29 **Methods**

### 30 *Study design*

31 A qualitative study design was selected, drawing on data from a scoping literature review[21]  
32 and interviews (i.e. individual and group) with Europe-based academics, legal professionals,  
33 statutory and voluntary service providers, community activists, and representatives from  
34 potentially-affected communities. The research question was "*What is the role of potentially-  
35 affected diaspora communities in interventions that respond to and challenge FGM in  
36 Europe?*" Table 1 provides definitions used.  
37  
38  
39  
40  
41  
42

### 43 *Participant sampling and recruitment*

44 Individual interview participants were recruited purposively to include academics, policy-  
45 makers, police officers, NGO staff, and community activists in EEA member countries with  
46 recognised FGM responses. Potential participants were selected from FGM publication  
47 authors and conference presenters, heads of relevant government departments and NGO  
48 programmes, community activists, and snowballing from other participants. Of 27 invitees, 18  
49 participated.  
50  
51  
52  
53

54 Group interview participants were recruited purposively to include senior and mid-level  
55 policy-makers, statutory and voluntary service providers, and community representatives  
56  
57  
58

1  
2  
3 selected for their FGM expertise and activism. Potential participants were selected from  
4 managers of relevant government departments, NGOs, community organisations, and  
5 activists who had worked with Scottish Refugee Council on women's rights projects. To  
6 reduce barriers to participation for some community representatives, travel expenses and  
7 childcare were provided. Of 59 invitees, 36 participated.  
8  
9

#### 10 11 *Data collection*

12 *In-depth key-informant interviews* were conducted by EC and HB in English and French.  
13 Interviews lasted approximately 60 minutes, were audio recorded or scribed depending on  
14 permission, and conducted in locations of participants' choosing.  
15  
16  
17

18  
19 *Semi-structured group interviews* were facilitated by EC and NM in English. Discussions  
20 lasted approximately 1.5 hours, included 4-9 participants, were either audio-recorded or  
21 scribed, and facilitated in a central Glasgow venue.  
22  
23  
24

#### 25 *Analysis and reporting*

26 Data were analysed thematically. The Scottish Government's strategic approach to  
27 preventing and eradicating violence against women and girls '4Ps' framework (i.e.  
28 prevention, protection, provision, participation) was used for initial deductive coding.  
29 Additional themes emerged using inductive coding. EC and NM coded data using Dedoose  
30 software, with checks by HB. Discrepancies were resolved through discussion and  
31 agreement among all authors. Reporting adhered to COREQ criteria for qualitative  
32 research[22].  
33  
34  
35  
36  
37

#### 38 *Patient and public involvement*

39 As 'patient involvement' was not applicable to this study, community advocates and women  
40 from potentially-affected communities acted as civil society and public representatives.  
41 Development of research question and outcome measures were informed by women's  
42 priorities, experience, and preferences through consultation with women's groups and review  
43 of unpublished literature. Women and advocates from potentially-affected communities were  
44 involved in study recruitment and conduct through the use of snowball sampling of  
45 participants and review of initial findings. Results were disseminated to study participants  
46 through sharing of the technical report, invitation to the report launch event, and open access  
47 publication of related articles.  
48  
49  
50  
51  
52  
53

#### 54 *Ethics*

1  
2  
3 The Research Ethics Committee of the London School of Hygiene & Tropical Medicine  
4 granted ethics approval (reference 7977).  
5  
6

## 7 Findings

8 Table 2 shows 18 individual interviews were conducted with participants working EU-wide  
9 and/or in seven countries with active interventions addressing FGM (i.e. Belgium, England,  
10 France, Ireland, Netherlands, Scotland, Spain). Five group interviews were conducted with a  
11 total of 36 policy-makers, service providers, and community representatives. Community  
12 participants, from Sudan, Somalia, Gambia, and Uganda, were activists or representatives of  
13 voluntary or community-led organisations working to address FGM.  
14  
15  
16  
17  
18

19 The role of communities is reported under the four 4Ps framework themes and one emergent  
20 theme (i.e. barriers to involvement). Each thematic section includes analysis of the extent to  
21 which potentially-affected communities were involved in addressing FGM in Europe  
22  
23  
24

### 25 Prevention

26 The role of potentially-affected communities in prevention is described under three emergent  
27 sub-themes of: (i) women's leadership; (ii) roles of men, youth, and religious leaders; and (iii)  
28 effective prevention interventions.  
29  
30  
31

32 *Women's leadership:* Participants identified women from potentially-affected communities,  
33 including survivors, as playing key roles in addressing FGM. Provided they had the trust and  
34 respect of their communities, these '*knowledgeable cultural guides*[23] were considered  
35 central to changing community behaviours. A participant explained that while '*it doesn't need*  
36 *to be a survivor...you do need someone from that community*' (KIF07). Norman and  
37 colleagues noted the effectiveness of messages from within communities:  
38  
39  
40

41 *'Women's arguments against FGM, spoken fluently and in their own words and*  
42 *crucially, coming from within the community, provide an important resource for those*  
43 *working to end FGM*[16]  
44  
45  
46

47 A UK participant highlighted the significance of a women-led '*African diaspora organisation*'  
48 addressing FGM:  
49

50 *"People recognize that we seem to have some kind of understanding of the issues...  
51 We...brought a woman from Somalia to deliver a session on social services and  
52 safeguarding children. It was a different dynamic... because this is somebody from the  
53 community talking about these issues."* (KIF15)  
54  
55  
56  
57  
58  
59  
60

1  
2  
3 *Roles of men, youth, and religious leaders:* While women from affected communities have  
4 been vital in prevention interventions, participants identified the important male role that was  
5 often missing.  
6

7 *'Something that's really missing is when we talk about the community, we always*  
8 *target women, but what about the men, are they not part of the decision-making?*  
9 *FGM is not only the woman's decision.'* (KIF07)  
10  
11  
12

13 Male perspectives provided deeper reflection about cultural complexities surrounding FGM  
14 and the most common arguments for its **continuation**[24]. One participant noted that men  
15 were increasingly involved and no longer viewed FGM as strictly '*women's business*' (KIF02).  
16 Another participant noted that men in migratory contexts were far more likely to be involved  
17 than in countries of origin (KIF09). In the Netherlands, involving men was common:  
18  
19

20 *'I never heard it was difficult to involve men and the men I've spoken with are very*  
21 *passionate.'* (KIF05).  
22  
23  
24

25 Participants identified young people as critical '*advocates of change*' (KIF15) and '*parents of*  
26 *the next generation*' (KIF04), able to speak freely about FGM and more likely to become  
27 involved in community activism. One participant noted that young people were most at risk of  
28 FGM and so educating and working with young people was vital if girls were expected '*to*  
29 *come forward and express their fear of having FGM*' (KIF17). Examples of effective work with  
30 British young people included Daughters of Eve, Integrate Bristol, and FORWARD. In Ireland  
31 and the UK, young people were involved in projects including '*using films and resources to*  
32 *support [...] statutory professionals in schools*' (KIF07), and developing poetry, radio  
33 documentaries, films, and music videos to '*encourage that conversation to happen in as*  
34 *many different settings as you can*' (KIF04).  
35  
36  
37  
38  
39  
40

41 Religious leaders influenced many communities and therefore could play a '*pivotal and*  
42 *respected role*' [25]. As one participant stated, '*in our community when we are worried about*  
43 *anything we contact our religious leaders*', suggesting involvement of religious leaders could  
44 be key (KIF17). Most religious leaders were men, potentially easing work with other men  
45 (KIF17). However, another source noted the need '*to critically examine the added benefit*' as  
46 preventative work had challenged the religious justifications of FGM without necessarily  
47 involving religious leaders[25].  
48  
49  
50  
51  
52

53 *Effective interventions:* The World Health Organisation (WHO) recommended a shift from  
54 awareness-raising to behaviour change approaches in 2009[1]. However, despite some  
55 exceptions, prevention interventions focused on awareness-raising rather than  
56  
57  
58  
59  
60

1  
2 empowerment and targeted behaviour change[1, 15]. Awareness-raising approaches often  
3 had broad target audiences and aims rather than focusing on communities most at risk.  
4 Thus, 'key targets ...may not be fully reached or engaged'[1]. Equally, approaches that  
5 focused on individual change, without acknowledging community belief systems, have  
6 resulted in slow progress addressing FGM across Europe[15]. When community  
7 organisations and statutory professionals worked together on prevention work, using joint  
8 messages on ending FGM, FGM rejection reportedly increased[25, 26].  
9  
10  
11  
12  
13

14 Participants identified EU-funded REPLACE and REPLACE2 programmes as effective  
15 prevention interventions, focused on Belgium, England, Italy, the Netherlands, Portugal, and  
16 Spain. REPLACE developed a toolkit for conducting participatory action research (PAR) with  
17 communities and a behaviour change cycle framework for enabling community members to  
18 take action to end FGM[15]. Enabling community members themselves to gather data from  
19 within their communities ensured that 'research is conducted 'with' rather than 'on' the  
20 community'[15].  
21  
22  
23  
24

25 "[REPLACE is] *innovative because it focuses on behaviour change; it works directly*  
26 *with the communities, which is quite exceptional in Europe [...It is] framed in a theory of*  
27 *behaviour change, which really has a thorough methodology... and also an evaluation.*"  
28 (KIF06)  
29  
30  
31

32 Participants identified PAR approaches generally as good practice, able to provide in-depth  
33 understanding of the interventions needed with particular communities. Participants identified  
34 a PAR initiative called Participatory Ethnographic Evaluation and Research, developed by  
35 Options and Swansea University, as "*an eye opener for a lot of the community members*"  
36 (KIF15) who recognised that FGM must be addressed in their community and went on to play  
37 key roles in other FGM interventions.  
38  
39  
40  
41  
42

43 Participants described *Ketenaapak* ('Dutch Chain Approach') in the Netherlands as  
44 particularly effective. This model was described as a '*meaningful initiative to involve*  
45 *communities in FGM prevention work and a landmark in the prevention of FGM in the*  
46 *Netherlands*[1]. In this multi-disciplinary approach, over 100 key community figures  
47 contributed to child protection and prevention through organising home visits and meetings  
48 within their communities to raise FGM awareness (KIF05). Several participants identified the  
49 *Federation of Somali Associations in the Netherlands (FSAN)* as a grassroots organisation  
50 playing an important role in identifying key figures within communities, coordinating activities,  
51 and providing training (KIF02; KIF03),  
52  
53  
54  
55  
56  
57  
58  
59  
60

1  
2  
3 The Tackling FGM Initiative (TFGMI), established in the UK in 2010, was a six-year  
4 collaboration between five funding bodies to strengthen community-based preventative  
5 work[26]. It provided many examples of good practice focused on community-led prevention  
6 and participation in activities across the UK, highlighting the crucial role of community  
7 'champions' supported by community organisations[25]. For example, a Manor Gardens  
8 training programme enabled London women and men to become paid Community  
9 Facilitators and work with healthcare professionals to organise FGM sessions (KIF18).  
10 Another example, Africa Advocacy Foundation, relied on social networks to create 'sister  
11 circles' (safe spaces for women) to enable community conversations around FGM in  
12 Southeast London[25]. Safe, women-only spaces were considered important '*for women to  
13 discover for themselves the nature of their reality through discussions with other women*'[27],  
14 as a first step in rejecting FGM[25]. As one participant noted, '*one of the mistakes we make  
15 is that we assume everyone knows that FGM is harmful whereas many women from  
16 communities or women who have experienced FGM don't see that*' (KIF17).  
17  
18  
19  
20  
21  
22  
23

### 24 25 Protection

26 The role of potentially-affected communities in protection is described under two sub-themes  
27 (i) prevention-protection linkages and (ii) effective protection.  
28  
29  
30

31 *Prevention-protection linkages:* Despite consensus that legislation and criminal justice  
32 approaches helped provide an enabling framework for prevention work, participants noted  
33 that such approaches could not succeed without a parallel focus on prevention.  
34

35 "*Given the deep-rooted cultural nature of harmful traditional practices, we can mount  
36 as many arrests as we possibly can [...], but unless...an affected community changes  
37 their thinking, then we're never going to truly...prevent or...eradicate these practices.*"  
38  
39 (KIM12)  
40  
41  
42

43 Prevention and protection were described by one participant as '*two sides of the same coin,  
44 neither can succeed without the other*' (KIF14). However, there are recognised tensions  
45 between these approaches[1, 28]. Preventive approaches are generally more collaborative[1]  
46 and community-focused[28]. Protection approaches, whilst perhaps necessarily promoting an  
47 unequivocal message around child protection, may lead to families being viewed as potential  
48 perpetrators[1]. Several participants highlighted that culturally aggressive top-down  
49 approaches imposed on communities, without the building of trust between families and  
50 professionals, could have unwanted consequences, e.g. girls being taken abroad for FGM  
51 (KIF01)[7] or already marginalised families, pushed further from mainstream society,  
52 '*cling[ing] to their own cultures and traditions more tightly*'[28].  
53  
54  
55  
56  
57  
58  
59  
60

1  
2  
3  
4 Participants in France and the Netherlands reported some success in achieving attitudinal  
5 change and reducing FGM through a combination of prevention and protection interventions.  
6 In France, a number of high profile prosecutions and legislative measures had been  
7 accompanied by investment in training and support for professionals, as well as education  
8 and awareness-raising in schools and universities, though the role of communities was not  
9 necessarily clear within this (KIF02). In the Netherlands (i.e. *Katenapaak*), participants  
10 reported most success developing a crucial role for communities within combined prevention  
11 and protection responses (KIF05). UK approaches were criticised for failing to effectively link  
12 protection and prevention agendas and involve communities: “...efforts to reduce FGM have  
13 focused on punitive legislation without at the same time empowering women in communities  
14 to engage in debate, change attitudes and create alternative ways of affirming their cultural  
15 identity”[14]. However, describing a successful Police-led community conference, a UK  
16 participant suggested that this was shifting, with many organisations ‘*motivated by the need*  
17 *for change*’ and prepared to support the police in developing ‘*community-driven*’ solutions  
18 (KIM12).  
19  
20  
21  
22  
23  
24  
25  
26  
27

28 *Effective protection:* Participants highlighted community involvement in protection  
29 interventions in the Netherlands, UK, and Spain. UK participants noted statutory agencies  
30 involving community organisations at an earlier stage when girls were identified as at risk of  
31 FGM (KIF17, KIF18). For example, FORWARD in London and NEw STep for African  
32 Community (NESTAC) in Manchester worked alongside authorities to deliver family  
33 education sessions, overcoming language and cultural barriers to strengthen engagement  
34 (KIF18). In Bristol, social services increased the capacity of community organisations to take  
35 on ‘safeguarding’ roles, working together to ensure common understandings of risk (KIF18).  
36  
37  
38  
39  
40

41 However, some participants expressed reservations about communities’ role in protection  
42 interventions, suggesting that statutory agencies passing on risk management responsibility  
43 to community organisations was risky (EG1; KIF18). Another noted that community  
44 organisations with experience of case management, e.g. around violence against women or  
45 asylum-seekers, could better manage the complexities of taking on a protection role[25]. A  
46 participant described the value of joint-working, in building community confidence to report  
47 concerns.  
48  
49  
50

51 *“If there is a cutter in the community, the chances are higher that the community*  
52 *members would be aware of it than a professional...we need to work with*  
53 *communities to train them and empower them...so they can report for themselves.”*  
54  
55 (KIF17)  
56  
57  
58

1  
2  
3  
4 Other examples included developing tools to support protection of individual women and  
5 girls. The Dutch Government produced a passport-sized declaration, signed by a range of  
6 community and non-community organisations, stating that FGM is forbidden and punishable  
7 by a prison sentence and loss of rights to residency, which families can carry when travelling  
8 overseas (KIF05). A Spanish region produced a similar official letter for families travelling  
9 abroad (KIF01). Participants highlighted the need for such tools to be developed in  
10 partnership with communities, as in the Netherlands. UK participants noted that when a  
11 similar tool was developed by the UK Government, communities did not feel ownership of it,  
12 lessening its impact (KIF15).  
13  
14  
15  
16  
17  
18

### 19 *Provision*

20 **The role of potentially-affected communities in** services provision **is described under two** sub-  
21 themes: (i) provision roles and (ii) facilitating access.  
22  
23  
24

25 *Provision roles:* Participants identified community organisations across Europe providing  
26 services from advocacy to psychological support, e.g. Daughters of Eve, FORWARD, FSAN,  
27 and GAMS - the *Groupe pour l'Abolition des Mutilations Sexuelles* (KIF03; KIF06, KIF15;  
28 KIF17). Fewer examples existed of community organisations influencing the planning, design  
29 or delivery of services, although participants concurred on the need for this (KIF17; KIF15;  
30 KIF18).  
31  
32  
33

34 *"If communities are involved they can tell what kind of services they require, rather*  
35 *than...you know coming from top down, where they make assumptions."* (KIF17)  
36  
37

38 *Facilitating access:* Although community organisations seldom delivered clinical services,  
39 they had an important role in facilitating women's engagement *"to understand why that*  
40 *service exists and... taking the time to explain it ...which is something that many health*  
41 *providers don't have the time to do"* (KIF17). UK participants described community  
42 involvement in developing and delivering specialist services (KIF15; KIF18). For example, an  
43 FGM clinic in Bristol was developed in response to lobbying from women who were involved  
44 in its design and sat on its steering group (KIF18). A London project, developed to support  
45 women failing to attend specialist appointments at an FGM clinic, involved community  
46 members calling/meeting clients to explain appointments, which improved services uptake  
47 (KIF18).  
48  
49  
50  
51  
52  
53

54 In response to such barriers as a reluctance to disclose FGM to health professionals (KIF05),  
55 a fear of being criminalised (KIF17), or a lack of trust (KIF18), compounded by health  
56  
57  
58

1  
2  
3 providers' own discomfort and reluctance to initiate discussions around FGM[29], community  
4 organisations and members were regarded as having a key role in facilitating access to  
5 services. Participants identified an example of a service employing outreach workers from  
6 the community who take on a 'mediating role' (KIF18). In another example, the Dutch  
7 Government funded a community organisation to implement an awareness raising campaign  
8 to get information to women about services available to them (KIF05). Another participant  
9 described a more informal role.

10  
11  
12  
13 *"I often get people phoning me asking for advice and support... A lot of women would*  
14 *say that they don't want to ask someone outside [...] So we need... a way... to give*  
15 *confidence to women to be able to speak to their GP or health visitor about their fear of*  
16 *FGM without feeling criminalised."* (KIF17)  
17  
18

19  
20 Many participants highlighted the gap between communities and statutory agencies and the  
21 need for engagement models that facilitated improved trust, confidence, and access (KIF15;  
22 KIF15; KIF18; KIF17; KIF08).  
23  
24  
25

#### 26 *Participation*

27  
28 **The role of potentially-affected communities in participation interventions is described under**  
29 **four** sub-themes: (i) communities' vital role, (ii) engagement and representativeness, (iii)  
30 involvement in campaigns, and (iv) the value of a clear and inclusive national strategy.  
31  
32

33  
34 *Vital role:* Literature and interview sources highlighted that empowering affected communities  
35 was the only way to end FGM[7, 12, 13, 23]. All participants emphasised the key role of  
36 potentially-affected communities, indicating it was vital to ensure interventions were informed  
37 by the experiences, needs and views of those affected by FGM.  
38

39  
40 *'Anything around FGM needs to be championed and developed with people affected at*  
41 *the centre and leading the work.'* (CG1)  
42  
43

44 Supporting and enabling community organisations to participate in policy-making was  
45 identified as essential.  
46

47 *'Finding ways and mechanisms to give [community organisations] that capacity, the*  
48 *framework and leverage for them to be heard [is] very important because I don't*  
49 *believe we can effectively abandon FGM in Europe [...] if those communities are not*  
50 *the ones...acting for the abandonment of FGM. It's a very important role and only they*  
51 *can actually do it.'* (KIF10)  
52  
53  
54  
55  
56  
57  
58  
59

1  
2  
3 *Engagement and representativeness:* Despite consensus on its value, most participants said  
4 insufficient efforts were made by policy-makers and practitioners to engage with communities  
5 (KIF06; KIF01; KIF07; KIF17; KIF18). This was particularly evident in the UK, with existing  
6 approaches described as *'piecemeal'* (KIF15) and *'tokenistic'* (KIF17; KIF18). Community  
7 participants cited examples of being excluded or included at the last minute to *'tick a box'*  
8 (KIF17) or when statutory professionals had a crisis (KIF18). In contrast, engagement in the  
9 Netherlands was described as *'active'* (KIF05; KIF18).

10  
11  
12  
13 *'I don't think there's any such thing as a hard-to-reach group. I think there's*  
14 *something called 'failed-to-reach groups by the statutory agencies' because there'll*  
15 *always be individuals or an organisation who'll get you access to affected*  
16 *communities.'* (KIM12)

17  
18  
19  
20 Participants noted a tendency of UK decision-makers to engage with the same handful of  
21 individuals as *'leaders'* or *'spokespeople'* (KIF18). One highlighted the difference between  
22 enabling individual community members to participate and working with community  
23 organisations.

24  
25  
26 *"[Community organisations] are bringing more than just their personal opinion, they*  
27 *tend... to be engaging more widely with the community and so can be a channel to*  
28 *have these voices heard."* (KIF18)

29  
30  
31  
32 Representativeness appeared to be a particular challenge for countries newer to FGM issues  
33 (e.g. Portugal) as community organisations might not yet exist around this issue or have  
34 confidence and advocacy experience (KIF18). Thus, whether effective or *'active'* participation  
35 was achieved appeared to vary between - and sometimes within – countries, potentially  
36 depending on whether decision-makers valued community organisations.

37  
38  
39  
40 *"It depends... whether the local authority [...] values community interventions and*  
41 *whether they see the community as a problem and... statutory professionals as the*  
42 *answer...or whether [the local authority] views the community as part and parcel of*  
43 *[...] the solution."* (KIF18)

44  
45  
46  
47 UK participants noted that most FGM work occurred in silos, further challenging effective  
48 participation. Interventions focused solely on FGM failed to account for *'gendered social*  
49 *norms... and nature of women's lives'* (KIF15)[30]. Participants indicated that separating  
50 FGM from issues like domestic violence was a major problem.

51  
52  
53 *"They are seen as completely separate topics or discrete topics as opposed to how*  
54 *do these principles cut across the way we navigate our communities and navigate our*  
55 *spaces."* (KIF18)

1  
2  
3  
4 *Campaigns*: Several participants said that communities played an important role in  
5 campaigning and awareness-raising. The Europe-wide End FGM Campaign led by Amnesty  
6 International Ireland and the lobbying work of GAMS, a large French NGO founded in 1982  
7 by women of African and Western origin, were highlighted (KIF02). Others spoke of the  
8 important work of high profile survivor-campaigners, such as Layla Hussein in the UK  
9 (KIF07). One participant talked about her own role as a community campaigner in '*raising*  
10 *awareness through fashion...music and culture nights*' and '*campaigning, lobbying and*  
11 *working with the government*' (KIF07).  
12  
13  
14  
15

16  
17  
18 *Strategy*: Several participants noted that addressing FGM required strong strategic  
19 frameworks. Most suggested this should be a resourced, standalone, multi-agency, national  
20 action plan, developed in partnership with key stakeholders, including affected communities:  
21

22 *"Authorities should... design a plan of action on FGM and...attach a budget to it and [it]*  
23 *should not only be developed by officials in their offices but in collaboration with the*  
24 *communities themselves and with all stakeholders."* (KIF06)  
25  
26  
27

28 At least eight European countries had developed national FGM action plans by 2013[1] and  
29 Scotland did so in 2016[31]. There were very few examples across Europe of communities  
30 having a role in strategy development or being supported to influence policy and practice.  
31 The Finnish National Action Plan provided an example of community engagement, as it was  
32 developed by a working group of government ministries and African women's  
33 organisations[1]. Scotland's national action plan incorporated clear actions on community  
34 participation, but participants noted limited engagement with communities in its development  
35 (KIF17) and a general absence of community voices in the policy arena in Scotland (CG1;  
36 CG2; KIF17). Participants in several European countries noted disconnects between policy  
37 and reality.  
38

39 *"One thing we're missing which is the reality for many European countries, is the*  
40 *grassroots... There's a lot of awareness and there's a lot of policy but somehow we don't*  
41 *understand what's happening at the grass roots."* (KIF07)  
42  
43  
44  
45  
46  
47  
48

### 49 ***Barriers to community participation***

50 The main barriers identified to effective work with communities were: (i) cultural, i.e. within  
51 communities; (ii) structural, i.e. external to communities; and (iii) sustainability-related.  
52  
53

54 *Cultural*: Leadership of FGM work is not easy and participants described the importance of  
55 supporting community-members taking on such roles, e.g. through training, information, and  
56  
57  
58

1  
2  
3 access to services (KIF05; KIF13; KIF13). Negative consequences for community leaders or  
4 activists have been documented[32], including verbal abuse, criticism, threats, and family  
5 conflict (KIF05; KIF04; KIF17).  
6

7 *“I’ve had people from my community who have sent me...hate messages, saying...  
8 what you’re doing is wrong. And I’ve had family-members who have said that they  
9 will no longer speak to me... and that I... bring shame on them. It’s not... easy for me  
10 to take on this role. Trust me, there were times when I almost gave up” (KIF17)*  
11  
12  
13

14 Women may worry about bringing shame on their communities or experience shame or guilt  
15 if they speak about FGM to service providers or other ‘outsiders’ (KIF17; KIF16)[33],  
16 particularly as some communities are explicitly told not to speak about FGM (KIF17). Trust-  
17 related barriers were thus common between communities and professionals (KIF07; KIF04),  
18 particularly within child protection (KIF18) or health services, where usage of interpreters  
19 could compound trust issues (KIF16; KIF17). Taking time to build trust was therefore deemed  
20 important  
21  
22  
23

24  
25 *‘It’s not a case of turning up with knowledge, but of starting off with the knowledge of  
26 communities themselves, then building something together’ (KIF02)*  
27  
28

29 Gender norms and power dynamics within potentially-affected communities were identified  
30 as potential barriers, with several participants highlighting the importance of working with  
31 men and women separately before bringing them together if appropriate (KIF04; KIF07).  
32 While gender oppression was a structural barrier experienced by women globally, “its  
33 manifestation differs according to culture, country and social grouping”[27], thus affecting  
34 which avenues were open to women to challenge or engage with FGM and other aspects of  
35 their lives[30, 34].  
36  
37  
38  
39  
40

41 *Structural:* Lack of understanding among professionals of the value and potential role of  
42 communities was highlighted as a key barrier to their involvement in interventions. Key  
43 decision-makers and service providers would need to change the ways in which they work to  
44 ensure that communities were actively involved and heard. One participant provided an  
45 example of statutory professionals in Bristol who developed alternative ways of engaging  
46 with communities including attending community events, holding informal consultations, and  
47 making meetings and meeting space more equitable and community friendly (KIF18). Lack of  
48 compensation for travel and childcare expenses was cited as a barrier by several  
49 participants, including a lack of understanding by some professionals of why such expenses  
50 would even be required (KIF06; KIF17; KIF18).  
51  
52  
53  
54  
55

56 *‘It still feels like there is a need to explain the added value of communities to the*  
57  
58  
59

1  
2  
3 *powers that be.'* (KIF18)  
4

5  
6 *Sustainability:* Participants in different contexts raised concerns about the sustainability of  
7 FGM interventions, particularly those at community level that required long-term investment.  
8 Some indicated that although community-led organisations were often approached for their  
9 expertise, they were rarely funded for this advisory role (KIF15) and that significant  
10 government funding was needed (KIF06; KIF15). Others highlighted the need for longer-term  
11 investment in implementation and action beyond developing protocols, frame-works, and  
12 action plans (KIF15; KIF03). Several noted that much of the work of community organisations  
13 was not financially valued, with one participant stressing how important it was to recognise  
14 the challenging nature of this work, which is '*under-valued and under-resourced*', and  
15 questioning how long community members could continue to volunteer in such challenging  
16 roles (KIF15).  
17  
18  
19  
20  
21  
22

## 23 **Discussion**

### 24 *Principle findings*

25  
26 Clear consensus emerged that potentially-affected communities should have a role in all  
27 intervention areas and that this was vital to addressing FGM in Europe[1, 15, 25]. Despite  
28 this consensus and several examples of good practice (e.g. EU-funded REPLACE and  
29 REPLACE 2 programmes, Dutch *Ketenaapak*, the Tackling FGM Initiative), community roles  
30 remained inconsistent in FGM interventions and often non-existent in FGM policy  
31 development.  
32  
33  
34  
35

36  
37 Practices ranged from good examples of support for community-led interventions and  
38 partnership work with communities to less positive examples of tokenism and non-  
39 participation. Most FGM interventions across Europe focused on awareness-raising, and  
40 despite examples of good practice noted above, community participation appeared fairly  
41 minimal[1, 15]. The extent of community participation was inconsistent between and within  
42 countries. While community participation was accepted as vital, participants noted that  
43 practices associated with community participation varied enormously. This corresponded  
44 with the significant literature highlighting challenges inherent in increasing community  
45 participation, e.g. what level of participation[35, 36], '*who participates, in what, and for whose*  
46 *benefit*[37], and to what extent government organisations that engage with communities  
47 could change to develop truly participatory processes and spaces[38].  
48  
49  
50  
51  
52  
53

54  
55 The role of communities appeared most developed within prevention interventions, with good  
56 practice examples of both community-led initiatives and partnership. Protection-focused  
57  
58

1  
2  
3 approaches were more challenging in terms of participation, as the clear child-protection  
4 focus could stigmatise families[1, 7]. Community participation within safeguarding varied,  
5 with examples of both effective and emerging roles. Individuals and organisations had roles  
6 in building trust and bridging gaps between communities and authorities, though  
7 responsibility for managing risk should remain firmly with statutory bodies[25]. While several  
8 community-led organisations delivered a range of services, few examples were found of  
9 communities participating in designing, delivering or evaluating statutory services. Good  
10 practice examples were identified of community organisations or activists playing a key role  
11 in facilitating services access and enabling dialogue within communities to occur[25].  
12  
13  
14  
15

### 16 17 *Implications for policy and practice*

18 Engaging potentially-affected communities in coordinated multi-agency responses appears  
19 critical to the success of FGM policies and interventions in Europe. Decision-makers and  
20 service providers should invest in community engagement by (i) ensuring that community  
21 organisations can participate actively in future interventions and (ii) addressing cultural,  
22 structural, and sustainability-related barriers to participation.  
23  
24  
25  
26

27 Supporting and strengthening community organisations can improve engagement. Bottom-up  
28 approaches that enable dialogue within communities appear most successful. Community  
29 development support could enable potentially-affected communities to identify their own  
30 FGM-related concerns and aspirations and work collectively to identify solutions and take  
31 action. This requires long-term investment in community development support and  
32 community organisations themselves, to support community-led interventions and  
33 meaningful engagement between communities and policy-makers. Any engagement with  
34 communities must begin with identifying those communities potentially affected,  
35 acknowledging that communities are not homogenous, and engaging with a wide range of  
36 groups and community representatives across nationalities and ethnicities. As most women  
37 and girls affected by FGM also identify as people of colour, perspectives and lived  
38 experiences must be included in development of meaningful policies and services.  
39  
40  
41  
42  
43  
44  
45

46 Research on FGM interventions across Europe is limited, when compared to levels of  
47 activism. Research has focused on clinical care, provision of health services, and attitudes  
48 towards FGM. Minimal investigation has been conducted on the role of diaspora  
49 communities and their contributions to challenging and responding to FGM. Empowerment,  
50 engagement, and participation are frequently mentioned, but rarely critically examined, with  
51 little discussion about how to move beyond rhetoric towards putting these concepts into  
52 practice. Further research with communities, including participatory methods, appears  
53  
54  
55  
56  
57  
58

warranted. Any such research should include the voices of affected women and girls, as those best able to describe their lived experiences and needs and to contribute to the additionally sensitive topics of prosecution and redress.

### *Limitations*

This study had three significant limitations. First, this study was exploratory and participant numbers were limited due to time and resource constraints. Second, numbers of participants from potentially-affected communities were limited and further community engagement is needed to expand on issues raised. Finally, focus on European interventions ignored the successfully designed and implemented African interventions, e.g. TOSTAN ([www.tostan.org](http://www.tostan.org)) that offer international benchmarks for changing attitudes and reducing FGM[21].

### **Conclusion**

Exploring the role of communities within interventions to address FGM in Europe allowed critical examination of how crucial community voices remain marginalised and could be better heard and supported. “*Without an effective commitment to the participation and empowerment of potentially-affected communities, policy-makers and practitioners will not identify the actual risks experienced by diaspora girls and women in Europe or develop effective interventions, and risk further marginalising those community voices that are the most effective advocates for change*”[6]. Results demonstrate that it is possible to work alongside potentially-affected communities, benefitting from community perspectives and expertise, to develop meaningful partnerships and support community-led interventions.

### **Declarations**

#### *Conflict of interest*

None declared.

#### *Author contributions*

EC contributed to study design, data collection and analysis and drafted the manuscript. NM contributed to study design, data analysis, and manuscript writing. HB contributed to study design, data collection and analysis, and critically reviewed the manuscript. NH contributed to study design and data interpretation and critically revised the manuscript. All authors approved the version for submission.

#### *Acknowledgements*

Special thanks to all key informants, particularly women from potentially-affected

communities, for their invaluable insights.

### *Funding*

This work was supported by the Scottish Government Equality Fund and Rosa FGM Small Grants Programme for funding research.

### *Data sharing*

Anonymised dataset and coding are available on request in accordance with LSHTM institutional data management policy.

### **References**

1. EIGE, *Female genital mutilation in European Union and Croatia*. 2013, Belgium: European Institute for Gender Equality.
2. Kaplan, A., et al., *Female genital mutilation/cutting in The Gambia: long-term health consequences and complications during delivery and for the newborn*. Int J Womens Health, 2013. **5**: p. 323-31.
3. Kaplan, A., et al., *Health consequences of female genital mutilation/cutting in the Gambia, evidence into action*. Reprod Health, 2011. **8**: p. 26.
4. Leye, E., et al., *Towards a better estimation of prevalence of female genital mutilation in European Union: interpreting existing evidence in all EU Member States*. Genus, 2014. **LXX**(1): p. 99-121.
5. UNICEF, *Female Genital Mutilation/Cutting: A Statistical overview and exploration of the dynamics of change*. 2013, New York: UNICEF.
6. Baillot, H., et al., *Tackling Female Genital Mutilation in Scotland: A Scottish model of intervention* 2014, Scottish Refugee Committee; LSHTM: Glasgow.
7. Gele, A.A., E.B. Johansen, and J. Sundby, *When female circumcision comes to the West: attitudes toward the practice among Somali Immigrants in Oslo*. BMC Public Health, 2012. **12**: p. 697.
8. Hemmings, J., *The FGM Initiative: interim report*. 2011, Options UK, Esmee Fairbairn Foundation, Rosa, Trust for London: London.
9. Shaw, M., *Community Work Today: Competing Demands in Practice*. Concept, 2013. **4**(2).
10. CDNOS, *Community Development National Occupational Standards*. 2015: London.
11. Berg, R.C. and E. Denison, *A tradition in transition: factors perpetuating and hindering the continuance of female genital mutilation/cutting (FGM/C) summarized in a systematic review*. Health Care Women Int, 2013. **34**(10): p. 837-59.
12. Costello, S., et al., *In the Best Interests of the Child: Preventing Female Genital Cutting (FGC)*. British Journal of Social Work, 2013: p. 1–18.
13. Isman, E., C. Ekeus, and V. Berggren, *Perceptions and experiences of female genital mutilation after immigration to Sweden: an explorative study*. Sex Reprod Healthc, 2013. **4**(3): p. 93-8.
14. Dustin, M., *Female Genital Mutilation/Cutting in the UK: Challenging the Inconsistencies*. European Journal of Women's Studies, 2010. **17**(7).
15. Brown, K., D. Beecham, and H. Barrett, *The Applicability of Behaviour Change in Intervention Programmes Targeted at Ending Female Genital Mutilation in the EU: Integrating Social Cognitive and Community Level Approaches*. Obstet Gynecol Int, 2013. **2013**: p. 324362.

16. Norman, K., et al., *FGM is always with us. Experiences, Perceptions and Beliefs of Women Affected by Female Genital Mutilation in London: Results from a PEER Study*. 2009, Options Consultancy Services and FORWARD: London.
17. Johnsdotter, S., *The Impact of Migration on Attitudes to Female Genital Cutting and Experiences of Sexual Dysfunction Among Migrant Women with FGC*. *Curr Sex Health Rep*, 2018. **10**(1): p. 18-24.
18. Johnsdotter, S., et al., "Never my daughters": a qualitative study regarding attitude change toward female genital cutting among Ethiopian and Eritrean families in Sweden. *Health Care Women Int*, 2009. **30**(1-2): p. 114-33.
19. Scottish Government, *Safer Lives: Changed Lives: A Shared Approach to Tackling Violence Against Women in Scotland*. 2009, Edinburgh: COSLA.
20. Council of Europe, *Convention on preventing and combatting violence against women and domestic violence*. 2011: <http://www.refworld.org/docid/4ddb74f72.html>.
21. Baillot, H., et al., *Addressing female genital mutilation in Europe: a scoping review of approaches to participation, prevention, protection, and provision of services*. *Int J Equity Health*, 2018. **17**(1): p. 21.
22. Tong, A., P. Sainsbury, and J. Craig, *Consolidated criteria for reporting qualitative research (COREQ): a 32-item checklist for interviews and focus groups*. *Int J Qual Health Care*, 2007. **19**(6): p. 349-57.
23. Khaja, K., et al., *Female genital cutting: African women speak out*. *International Social Work*, 2009. **52**(5): p. 1-15.
24. Reig Alcaraz, M., J. Siles Gonzalez, and C. Solano Ruiz, *Attitudes towards female genital mutilation: an integrative review*. *Int Nurs Rev*, 2014. **61**(1): p. 25-34.
25. Khalifa, S. and E. Brown, *Communities Tackling FGM in the UK: Best Practice Guide*. 2016, the Tackling Female Genital Mutilation Initiative and Options Consultancy Services Ltd: London.
26. Brown, E. and C. Porter, *The Tackling FGM Initiative: Evaluation of the Second Phase (2013–2016)*. 2016, Options Consultancy Services Ltd, Trust for London, Esmee Fairbairn Foundation, Rosa, Comic Relief: London.
27. Dominelli, L., *Women in the community: feminist organising principles and organising in community work*. *Community Development Journal*, 1995. **30**(2): p. 133-143.
28. Berer, M., *The history and role of the criminal law in anti-FGM campaigns: Is the criminal law what is needed, at least in countries like Great Britain?* *Reprod Health Matters*, 2015. **23**(46): p. 145-57.
29. Abdulcadir, J., et al., *Missed opportunities for diagnosis of female genital mutilation*. *Int J Gynaecol Obstet*, 2014. **125**(3): p. 256-60.
30. Chai, X., et al., *Married women's negotiation for safer sexual intercourse in Kenya: Does experience of female genital mutilation matter?* *Sex Reprod Healthc*, 2017. **14**: p. 79-84.
31. Scottish Government, *Scotland's National Action Plan to Prevent and Eradicate female genital mutilation (FGM) 2016-2020*. 2016, COSLA: [www.gov.scot/Resource/0049/00493752.pdf](http://www.gov.scot/Resource/0049/00493752.pdf).
32. Behrendt, A., *Listening to African Voices. Female Genital Mutilation/Cutting among Immigrants in Hamburg: Knowledge, Attitudes and Practice*. 2011, Plan International Deutschland e.V: Hambourg.
33. Vloeberghs, E., et al., *Coping and chronic psychosocial consequences of female genital mutilation in The Netherlands*. *Ethn Health*, 2012. **17**(6): p. 677-95.
34. Mpofu, S., et al., *The relation of female circumcision to sexual behavior in Kenya and Nigeria*. *Women Health*, 2017. **57**(7): p. 757-774.
35. Arnstein, S.R., *A Ladder Of Citizen Participation*. *Journal of the American Institute of Planners*, 1969. **35**(4): p. 216-224.
36. Cornwall, A., *Unpacking 'Participation': models, meanings and practices*. *Community Development Journal* 2008. **43**(1): p. 269–283.

- 1  
2  
3 37. Cornwall, A. and A. Rivas, *From 'gender equality and 'women's empowerment' to*  
4 *global justice: reclaiming a transformative agenda for gender and development*. Third  
5 World Quarterly, 2015. **36**(2): p. 396-415.  
6 38. Eversole, R., *Remaking Participation: challenges for community development*  
7 *practice*. Community Development Journal, 2012. **47**(1): p. 29-41.  
8 39. UNICEF, *Female Genital Mutilation/Cutting: A Global Concern*. 2016, UNICEF:  
9 [https://www.unicef.org/media/files/FGMC\\_2016\\_brochure\\_final\\_UNICEF\\_SPREAD.p](https://www.unicef.org/media/files/FGMC_2016_brochure_final_UNICEF_SPREAD.pdf)  
10 [df](https://www.unicef.org/media/files/FGMC_2016_brochure_final_UNICEF_SPREAD.pdf).  
11  
12  
13  
14  
15  
16  
17  
18  
19  
20  
21  
22  
23  
24  
25  
26  
27  
28  
29  
30  
31  
32  
33  
34  
35  
36  
37  
38  
39  
40  
41  
42  
43  
44  
45  
46  
47  
48  
49  
50  
51  
52  
53  
54  
55  
56  
57  
58  
59  
60

For peer review only

## Tables

### Table 1. Key definitions

|                                |                                                                                                                                                                                                                                                                                                                                                                                                                                                                                                                                                                                                                                                                             |
|--------------------------------|-----------------------------------------------------------------------------------------------------------------------------------------------------------------------------------------------------------------------------------------------------------------------------------------------------------------------------------------------------------------------------------------------------------------------------------------------------------------------------------------------------------------------------------------------------------------------------------------------------------------------------------------------------------------------------|
| Female genital mutilation      | All procedures that involve partial or total removal of the female external genitalia, or other injury to the female genital organs for non-medical reasons (WHO, 2016)                                                                                                                                                                                                                                                                                                                                                                                                                                                                                                     |
| Community                      | A community of identity has a common bond based on ' <i>geography, identity or interest</i> ' [10]                                                                                                                                                                                                                                                                                                                                                                                                                                                                                                                                                                          |
| Community development          | Community development enables people to work collectively to bring about positive social change. This long-term process starts from people's own experience and enables communities to work together to: <ul style="list-style-type: none"> <li>• identify their own needs and actions;</li> <li>• take collective action using their strengths and resources;</li> <li>• develop their confidence, skills and knowledge;</li> <li>• challenge unequal power relationships;</li> <li>• promote social justice, equality and inclusion;</li> </ul> to improve the quality of their own lives, the communities in which they live and societies of which they are a part [10] |
| Participation                  | Policy-making and practice development around violence against women is shaped by the experiences, needs and views of those affected by FGM [6]                                                                                                                                                                                                                                                                                                                                                                                                                                                                                                                             |
| Potentially-affected community | A diaspora community from one of 29 countries identified by UNICEF, in which FGM practices are concentrated, i.e. Somalia 98%, Guinea 96%, Djibouti 93%, Egypt 91%, Eritrea 89%, Mali 89%, Sierra Leone 88%, Sudan 88%, Gambia 76%, Burkina Faso 76%, Ethiopia 74%, Mauritania 69%, Liberia 66%, Guinea-Bissau 50%, Chad 44%, Cote d'Ivoire 38%, Kenya 27%, Nigeria 27%, Senegal 26%, CAR 24%, Yemen 23%, Tanzania 15%, Benin 13%, Iraq 8%, Ghana 4%, Togo 4%, Niger 2%, Cameroon 1%, Uganda 1% [5, 39]                                                                                                                                                                     |
| Prevention                     | Interventions intended to create and/or sustain behavioural and attitudinal change within affected communities [6]                                                                                                                                                                                                                                                                                                                                                                                                                                                                                                                                                          |
| Protection                     | Interventions intended to protect the individual rights of women and girls who are at risk of or have experienced FGM [6]                                                                                                                                                                                                                                                                                                                                                                                                                                                                                                                                                   |
| Service provision              | Service responses to survivors of FGM [6]                                                                                                                                                                                                                                                                                                                                                                                                                                                                                                                                                                                                                                   |

**Table 2. Participant characteristics**

| ID    | Role/Title                                | Location        | Interview type   |
|-------|-------------------------------------------|-----------------|------------------|
| KIF01 | University professor                      | Spain (Skype)   | KII              |
| KIF02 | NGO worker                                | France          | KII              |
| KIF03 | NGO worker                                | Netherlands     | KII              |
| KIF04 | Teacher                                   | England         | KII              |
| KIF05 | Government minister                       | Netherlands     | KII              |
| KIF06 | University professor                      | Belgium         | KII              |
| KIF07 | Community activist                        | Ireland (Skype) | KII              |
| KIF08 | Medical professional                      | England         | KII              |
| KIF09 | University professor                      | France          | KII              |
| KIF10 | INGO worker                               | EU              | KII              |
| KIF11 | Solicitor                                 | Scotland        | KII              |
| KIM12 | Police officer                            | England         | KII              |
| KIF13 | Police officer                            | England         | KII              |
| KIF14 | Legal professional                        | France          | KII (unrecorded) |
| KIF15 | NGO worker                                | England         | KII              |
| KIF16 | Medical professional                      | Scotland        | KII              |
| KIF17 | Community activist                        | Scotland        | KII              |
| KIF18 | Community activist                        | Scotland        | KII              |
| EG1   | 9 policy/practice participants            | Scotland        | Group interview  |
| EG2   | 9 policy/practice/community participants  | Scotland        | Group interview  |
| EG3   | 10 policy/practice/community participants | Scotland        | Group interview  |
| CG1   | 4 community activists                     | Scotland        | Group interview  |
| CG2   | 4 community activists                     | Scotland        | Group interview  |

# BMJ Open

## Missing from the debate? A qualitative study exploring the role of communities within interventions to address female genital mutilation in Europe

|                                 |                                                                                                                                                                                                                         |
|---------------------------------|-------------------------------------------------------------------------------------------------------------------------------------------------------------------------------------------------------------------------|
| Journal:                        | <i>BMJ Open</i>                                                                                                                                                                                                         |
| Manuscript ID                   | bmjopen-2017-021430.R2                                                                                                                                                                                                  |
| Article Type:                   | Research                                                                                                                                                                                                                |
| Date Submitted by the Author:   | 26-Apr-2018                                                                                                                                                                                                             |
| Complete List of Authors:       | Connelly, Elaine; Scottish Refugee Council<br>Murray, Nina; Scottish Refugee Council<br>Baillot, Helen; Scottish Refugee Council<br>Howard, Natasha; London School of Hygiene & Trop Med, Global Health and Development |
| <b>Primary Subject Heading</b>: | Public health                                                                                                                                                                                                           |
| Secondary Subject Heading:      | Health policy                                                                                                                                                                                                           |
| Keywords:                       |                                                                                                                                                                                                                         |
|                                 |                                                                                                                                                                                                                         |

SCHOLARONE™  
Manuscripts

1  
2  
3 **Missing from the debate? A qualitative study exploring the role of communities within**  
4 **interventions to address female genital mutilation in Europe**  
5

6  
7 Elaine Connelly<sup>1</sup>, Nina Murray<sup>1</sup>, Helen Baillot<sup>1</sup>, Natasha Howard<sup>2§</sup>  
8

9  
10 §Corresponding author  
11

12  
13 <sup>1</sup> Scottish Refugee Council, Portland House, 17 Renfield St, Glasgow G2 5AH

14 <sup>2</sup> London School of Hygiene and Tropical Medicine, Department of Global Health and  
15 Development, 15-17 Tavistock Place, London WC1H 9SH  
16  
17

18  
19 EC: [econnelly@mail.com](mailto:econnelly@mail.com)

20 NM: [nina@ninamurray.uk](mailto:nina@ninamurray.uk)

21 HB: [helen@hmbaillot.co.uk](mailto:helen@hmbaillot.co.uk)

22 NH: [natasha.howard@lshtm.ac.uk](mailto:natasha.howard@lshtm.ac.uk)  
23  
24  
25

26 **Key words**

27 FGM, female genital cutting, community development, Europe  
28  
29  
30  
31  
32  
33  
34  
35  
36  
37  
38  
39  
40  
41  
42  
43  
44  
45  
46  
47  
48  
49  
50  
51  
52  
53  
54  
55  
56  
57  
58  
59  
60

## Abstract

### *Introduction*

Public attention on female genital mutilation in diaspora communities is increasing in Europe, as health and social welfare implications become better understood. This study explored the role of potentially-affected communities within interventions to address female genital mutilation in Europe, examining current practices, promising interventions, and remaining gaps.

### *Methods*

A qualitative study design incorporated 18 individual key informant interviews and five semi-structured group interviews with policy-makers, service providers, and community representatives. Data were analysed thematically, guided by the Scottish Government '4Ps' framework for addressing violence against women and girls, i.e. prevention, protection, provision of services, and participation.

### *Results*

Participants emphasised both the importance of community participation and the lack of consistent engagement by policy-makers and practitioners. All indicated that communities had a key role, though most interventions focussed on awareness-raising rather than community empowerment, behaviour change, or influence on the design, delivery, and/or evaluation of interventions.

### *Conclusions*

Despite clear consensus around the need to engage, support, and empower potentially-affected communities and several examples of meaningful community participation in addressing female genital mutilation (e.g. REPLACE, REPLACE 2, *Ketenaapak*, Tackling FGM Initiative ), the role of communities remains inconsistent and further engagement efforts are necessary.

### **Strengths and limitations**

- This study was exploratory and participant numbers were limited, including members of potentially-affected communities, due to time and resource constraints.
- Study focus was on European interventions, thus excluding many innovative and successful African interventions.
- Nevertheless, this study is a rare effort to examine the under-researched role of diaspora communities in initiatives to address female genital mutilation in Europe, drawing from in-depth and semi-structured key informant interviews.

## Introduction

Female genital mutilation (FGM), a practice, defined in Table 1, that expresses '*deeply entrenched gender inequalities, grounded in a mix of cultural, religious and social facts inherent within patriarchal families and communities,*' is recognised internationally as a violation of the fundamental rights of women and girls and a serious form of gender-based violence[1]. Health implications of FGM are wide-ranging and well-established. Immediate health consequences include shock, haemorrhage, infection, and psychological trauma, while long-term risks include chronic pain, infections, cheloids, primary infertility, urogenital complications, birth complications, and danger to newborns[2, 3]. Though sometimes referred to as 'cutting' or 'female circumcision', this article uses 'FGM' to acknowledge the harm to women and communities.

Data indicate the existence of large communities potentially-affected by FGM in many European countries[1, 4]. For example, 23,979 people born in one of 29 'FGM-practising countries'[5], were living in Scotland in 2011[6]. However, attempts to estimate numbers of women and girls who have undergone or are at risk of FGM in diaspora communities in Europe have proven difficult due to data limitations and lack of agreement on prevalence estimation methods[4]. Additionally, the extent to which migration experiences may change attitudes and practices remains under-researched[7]. This article uses the term 'potentially-affected communities' to avoid presumptions attached to 'FGM practising communities' that may be inaccurate in a migratory context[8].

The concept of community is not straightforward, with a range of contradictory and related meanings used on all sides of the political spectrum[9]. Often defined by geography, interest, or identity, communities are not homogenous or static but rather diverse, dynamic, and multifaceted entities[10]. This article primarily describes communities of identity, where the common bond is often nationality, ethnicity, and the experience of exile, although some may also be issue-based or geographical.

FGM is described as a '*tradition in transition*'[11], with some experts asserting that empowering affected communities will lead to its elimination[7, 12, 13]. Public, media, and political attention on FGM in diaspora communities within Europe has increased, but often focuses on criminal justice and child protection[14]. While many European countries have enacted legislation and policy initiatives, the role of communities in interventions addressing FGM remains limited[1, 14]. Little research has been conducted on the role of communities in FGM interventions and very few have been rigorously evaluated[15]. Thus, community

1  
2  
3 voices are generally missing from FGM policy debates and partnerships, despite growing  
4 consensus that communities are key in addressing FGM[16]. Working with potentially-  
5 affected communities may provide a key opportunity, as the process of migration and exile  
6 allows communities to reflect, question, and debate traditional beliefs[17, 18].  
7  
8  
9

10 This study aimed to explore the role of communities within interventions to address FGM in  
11 Europe, describing perspectives of practitioners, activists, and community representatives on  
12 current practices, promising interventions, and gaps that should be addressed. Findings are  
13 presented using the Scottish Government's 4Ps framework (i.e. prevention, protection,  
14 provision of services, participation) described in its strategic approach to tackling violence  
15 against women[19]. This approach reflects and builds upon European level work, e.g. the  
16 European Institute for Gender Equality identifies five focus areas (i.e. prevalence, prevention,  
17 protection, prosecution, provision of services) as does the Due Diligence Standard of the  
18 Istanbul Convention (i.e. prevent, protect, prosecute and punish, provide services and  
19 redress) that was signed by 47 countries with FGM interventions[1, 20]. Thus, themes have  
20 relevance for policy-makers, researchers, community development practitioners, and  
21 professionals working with potentially-affected communities.  
22  
23  
24  
25  
26  
27  
28

## 29 **Methods**

### 30 *Study design*

31 A qualitative study design was selected, drawing on data from a scoping literature review[21]  
32 and interviews (i.e. individual and group) with Europe-based academics, legal professionals,  
33 statutory and voluntary service providers, community activists, and representatives from  
34 potentially-affected communities. The research question was "*What is the role of potentially-*  
35 *affected diaspora communities in interventions that respond to and challenge FGM in*  
36 *Europe?*" Table 1 provides definitions used.  
37  
38  
39  
40  
41  
42

### 43 *Participant sampling and recruitment*

44 Individual interview participants were recruited purposively to include academics, policy-  
45 makers, police officers, NGO staff, and community activists in EEA member countries with  
46 recognised FGM responses. Initially, interview participants were identified through the  
47 literature review[21] (i.e. conference presenters and lead authors, and other authors  
48 appearing in more than one article, were invited by email). Additionally, heads of relevant  
49 government departments, NGO programme staff, and community activists known for their  
50 FGM expertise related to one or more of the '4P' focus areas were contacted by phone or  
51 email. Lastly, further recruits were identified through snowball sampling from participants. Of  
52 27 invitees, 18 participated. The nine non-respondents gave no reason for not responding to  
53  
54  
55  
56  
57  
58  
59

1  
2  
3 email invitations or telephone reminder, but all were busy professionals with varied roles and  
4 worked at different levels across the EU and there were no identifiable differences between  
5 respondents and non-respondents.  
6  
7

8  
9 Group interview participants were recruited purposively to include senior and mid-level  
10 policy-makers, statutory and voluntary service providers, and community representatives  
11 selected for their FGM expertise and activism. Potential participants were selected from  
12 managers of relevant government departments, NGOs, community organisations, and  
13 activists who had worked with Scottish Refugee Council on women's rights projects. To  
14 reduce barriers to participation for some community representatives, travel expenses and  
15 childcare were provided. Of 59 invitees, 36 participated. Group interviews were all conducted  
16 on the same day, and thus more people were intentionally invited than were expected to  
17 attend, with non-participation reported as due to lack of availability. However, all invited  
18 agencies and groups were represented.  
19  
20  
21  
22  
23

#### 24 25 *Data collection*

26 *In-depth key-informant interviews* were conducted by EC and HB in English and French  
27 using a topic guide based on the 4P framework. Interviews lasted approximately 60 minutes,  
28 were audio recorded and/or scribed depending on permission, and conducted privately in  
29 locations of participants' choosing. Additional participants were recruited until researchers  
30 were confident that data saturation had been achieved[22].  
31  
32  
33  
34

35 *Semi-structured group interviews* were facilitated by EC and NM in English using an  
36 interview guide based on the 4P framework. Discussions lasted approximately 1.5 hours,  
37 included 4-9 participants, were audio-recorded and/or scribed, and facilitated in a central  
38 Glasgow venue.  
39  
40  
41  
42

43 All participants received a study information sheet, had their questions answered, and  
44 provided written informed consent prior to interview. Approximately a third of participants  
45 knew researchers professionally prior to interview, due to their work with refugees, violence  
46 against women, or community development. Additionally, EC, HB, and NM summarised the  
47 research purpose, reasons, and their interest in the topic.  
48  
49  
50

#### 51 *Analysis and reporting*

52 Data were analysed thematically, as described in Braun and Clarke[23]. The Scottish  
53 Government's strategic approach to preventing and eradicating violence against women and  
54 girls '4Ps' framework (i.e. prevention, protection, provision, participation) was used for initial  
55  
56  
57  
58

1  
2  
3 deductive coding. Additional themes and sub-themes were captured using inductive coding.  
4 EC and NM coded data using *Dedoose* software, with checks by HB. Discrepancies were  
5 resolved through discussion and agreement among all authors. Reporting adhered to  
6 COREQ criteria for qualitative research[24].  
7  
8  
9

### 10 *Patient and public involvement*

11 As 'patient involvement' was not applicable to this study, community advocates and women  
12 from potentially-affected communities acted as civil society and public representatives.  
13 Development of research question and outcome measures were informed by women's  
14 priorities, experience, and preferences through consultation with women's groups and review  
15 of unpublished literature. Women and advocates from potentially-affected communities were  
16 involved in study recruitment and conduct through the use of snowball sampling of  
17 participants and review of initial findings. Results were disseminated to study participants  
18 through sharing of the technical report, invitation to the report launch event, and open access  
19 publication of related articles.  
20  
21  
22  
23  
24  
25

### 26 *Ethics*

27 The Research Ethics Committee of the London School of Hygiene & Tropical Medicine  
28 granted ethics approval (reference 7977).  
29  
30  
31

### 32 **Findings**

33 Table 2 shows 18 individual interviews were conducted with participants working EU-wide  
34 and/or in seven countries with active interventions addressing FGM (i.e. Belgium, England,  
35 France, Ireland, Netherlands, Scotland, Spain). Five group interviews were conducted with a  
36 total of 36 policy-makers, service providers, and community representatives. Community  
37 participants, from Sudan, Somalia, Gambia, and Uganda, were activists or representatives of  
38 voluntary or community-led organisations working to address FGM.  
39  
40  
41  
42  
43

44 The role of communities is reported under the four 4Ps framework themes and one emergent  
45 theme (i.e. barriers to involvement). Each thematic section includes analysis of the extent to  
46 which potentially-affected communities were involved in addressing FGM in Europe  
47  
48  
49

### 50 *Prevention*

51 The role of potentially-affected communities in prevention is described under three emergent  
52 sub-themes of: (i) women's leadership; (ii) roles of men, youth, and religious leaders; and (iii)  
53 effective prevention interventions.  
54  
55  
56  
57  
58  
59  
60

1  
2  
3 *Women's leadership:* Participants identified women from potentially-affected communities,  
4 including survivors, as playing key roles in addressing FGM. Provided they had the trust and  
5 respect of their communities, these '*knowledgeable cultural guides*' [25] were considered  
6 central to changing community behaviours. A participant explained that while '*it doesn't need*  
7 *to be a survivor...you do need someone from that community*' (KIF07). Norman and  
8 colleagues noted the effectiveness of messages from within communities:  
9

10  
11 *'Women's arguments against FGM, spoken fluently and in their own words and*  
12 *crucially, coming from within the community, provide an important resource for those*  
13 *working to end FGM*[16]  
14  
15

16  
17  
18 A UK participant highlighted the significance of a women-led '*African diaspora organisation*'  
19 addressing FGM:

20 *"People recognize that we seem to have some kind of understanding of the issues...*  
21 *We...brought a woman from Somalia to deliver a session on social services and*  
22 *safeguarding children. It was a different dynamic... because this is somebody from the*  
23 *community talking about these issues."* (KIF15)  
24  
25  
26

27  
28 *Roles of men, youth, and religious leaders:* While women from affected communities have  
29 been vital in prevention interventions, participants identified the important male role that was  
30 often missing.

31  
32 *'Something that's really missing is when we talk about the community, we always*  
33 *target women, but what about the men, are they not part of the decision-making?*  
34 *FGM is not only the woman's decision.'* (KIF07)  
35  
36  
37

38  
39 Male perspectives provided deeper reflection about cultural complexities surrounding FGM  
40 and the most common arguments for its continuation[26]. One participant noted that men  
41 were increasingly involved and no longer viewed FGM as strictly '*women's business*' (KIF02).  
42 Another participant noted that men in migratory contexts were far more likely to be involved  
43 than in countries of origin (KIF09). In the Netherlands, involving men was common:

44  
45 *'I never heard it was difficult to involve men and the men I've spoken with are very*  
46 *passionate.'* (KIF05).  
47  
48  
49

50  
51 Participants identified young people as critical '*advocates of change*' (KIF15) and '*parents of*  
52 *the next generation*' (KIF04), able to speak freely about FGM and more likely to become  
53 involved in community activism. One participant noted that young people were most at risk of  
54 FGM and so educating and working with young people was vital if girls were expected '*to*  
55 *come forward and express their fear of having FGM*' (KIF17). Examples of innovative work  
56  
57  
58

1  
2  
3 with British young people included Daughters of Eve, Integrate Bristol, and FORWARD. In  
4 Ireland and the UK, young people were involved in projects including *'using films and*  
5 *resources to support [...] statutory professionals in schools'* (KIF07), and developing poetry,  
6 radio documentaries, films, and music videos to *'encourage that conversation to happen in*  
7 *as many different settings as you can'* (KIF04).  
8  
9

10  
11 Religious leaders influenced many communities and therefore could play a *'pivotal and*  
12 *respected role*[27]. As one participant stated, *'in our community when we are worried about*  
13 *anything we contact our religious leaders'*, suggesting involvement of religious leaders could  
14 be key (KIF17). Most religious leaders were men, potentially easing work with other men  
15 (KIF17). However, another source noted the need *'to critically examine the added benefit'* as  
16 preventative work had challenged the religious justifications of FGM without necessarily  
17 involving religious leaders[27].  
18  
19  
20  
21  
22

23 *Perceived effective interventions:* The World Health Organisation (WHO) recommended a  
24 shift from awareness-raising to behaviour change approaches in 2009[1]. However, despite  
25 some exceptions, prevention interventions focused on awareness-raising rather than  
26 empowerment and targeted behaviour change[1, 15]. Awareness-raising approaches often  
27 had broad target audiences and aims rather than focusing on communities most at risk.  
28 Thus, *'key targets ...may not be fully reached or engaged'*[1]. Equally, approaches that  
29 focused on individual change, without acknowledging community belief systems, have  
30 resulted in slow progress addressing FGM across Europe[15]. When community  
31 organisations and statutory professionals worked together on prevention work, using joint  
32 messages on ending FGM, FGM rejection reportedly increased[27, 28].  
33  
34  
35  
36  
37  
38  
39

40 Participants identified EU-funded REPLACE and REPLACE2 programmes as *'effective*  
41 *prevention interventions'*, focused on Belgium, England, Italy, the Netherlands, Portugal, and  
42 Spain. REPLACE developed a toolkit for conducting participatory action research (PAR) with  
43 communities and a behaviour change cycle framework for enabling community members to  
44 take action to end FGM[15]. Enabling community members themselves to gather data from  
45 within their communities ensured that *'research is conducted 'with' rather than 'on' the*  
46 *community*[15].  
47  
48  
49

50 *"[REPLACE is] innovative because it focuses on behaviour change; it works directly*  
51 *with the communities, which is quite exceptional in Europe [...It is] framed in a theory of*  
52 *behaviour change, which really has a thorough methodology... and also an evaluation."*  
53 (KIF06)  
54  
55  
56  
57  
58  
59  
60

1  
2  
3 Participants identified PAR approaches generally as 'good practice', able to provide in-depth  
4 understanding of the interventions needed with particular communities. Participants identified  
5 a PAR initiative called Participatory Ethnographic Evaluation and Research, developed by  
6 Options and Swansea University, as "*an eye opener for a lot of the community members*"  
7 (KIF15) who recognised that FGM must be addressed in their community and went on to play  
8 key roles in other FGM interventions.  
9  
10

11  
12  
13 Participants described *Ketenaapak* ('Dutch Chain Approach') in the Netherlands as  
14 'particularly effective'. This model was described as a '*meaningful initiative to involve*  
15 *communities in FGM prevention work and a landmark in the prevention of FGM in the*  
16 *Netherlands*[1]. In this multi-disciplinary approach, over 100 key community figures  
17 contributed to child protection and prevention through organising home visits and meetings  
18 within their communities to raise FGM awareness (KIF05). Several participants identified the  
19 *Federation of Somali Associations in the Netherlands (FSAN)* as a grassroots organisation  
20 playing an important role in identifying key figures within communities, coordinating activities,  
21 and providing training (KIF02; KIF03),  
22  
23  
24  
25  
26  
27

28 The Tackling FGM Initiative (TFGMI), established in the UK in 2010, was a six-year  
29 collaboration between five funding bodies to strengthen community-based preventative  
30 work[28]. It provided many examples of good practice focused on community-led prevention  
31 and participation in activities across the UK, highlighting the crucial role of community  
32 'champions' supported by community organisations[27]. For example, a Manor Gardens  
33 training programme enabled London women and men to become paid Community  
34 Facilitators and work with healthcare professionals to organise FGM sessions (KIF18).  
35 Another example, Africa Advocacy Foundation, relied on social networks to create '*sister*  
36 *circles*' (safe spaces for women) to enable community conversations around FGM in  
37 Southeast London[27]. Safe, women-only spaces were considered important '*for women to*  
38 *discover for themselves the nature of their reality through discussions with other women*'[29],  
39 as a first step in rejecting FGM[27]. As one participant noted, '*one of the mistakes we make*  
40 *is that we assume everyone knows that FGM is harmful whereas many women from*  
41 *communities or women who have experienced FGM don't see that*' (KIF17).  
42  
43  
44  
45  
46  
47  
48  
49

### 50 *Protection*

51 The role of potentially-affected communities in protection is described under two sub-themes  
52 (i) prevention-protection linkages and (ii) effective protection.  
53  
54  
55  
56  
57  
58  
59  
60

1  
2  
3 *Prevention-protection linkages:* Despite consensus that legislation and criminal justice  
4 approaches helped provide an enabling framework for prevention work, participants noted  
5 that such approaches could not succeed without a parallel focus on prevention.  
6

7 *“Given the deep-rooted cultural nature of harmful traditional practices, we can mount*  
8 *as many arrests as we possibly can [...], but unless...an affected community changes*  
9 *their thinking, then we’re never going to truly...prevent or...eradicate these practices.”*  
10

11 (KIM12)  
12  
13

14 Prevention and protection were described by one participant as *‘two sides of the same coin,*  
15 *neither can succeed without the other’* (KIF14). However, there are recognised tensions  
16 between these approaches[1, 30]. Preventive approaches are generally more collaborative[1]  
17 and community-focused[30]. Protection approaches, whilst perhaps necessarily promoting an  
18 unequivocal message around child protection, may lead to families being viewed as potential  
19 perpetrators[1]. Several participants highlighted that culturally aggressive top-down  
20 approaches imposed on communities, without the building of trust between families and  
21 professionals, could have unwanted consequences, e.g. girls being taken abroad for FGM  
22 (KIF01)[7] or already marginalised families, pushed further from mainstream society,  
23 *‘cling[ing] to their own cultures and traditions more tightly*[30].  
24  
25  
26  
27  
28  
29  
30

31 Participants in France and the Netherlands reported some success in achieving attitudinal  
32 change and reducing FGM through a combination of prevention and protection interventions.  
33 In France, a number of high profile prosecutions and legislative measures had been  
34 accompanied by investment in training and support for professionals, as well as education  
35 and awareness-raising in schools and universities, though the role of communities was not  
36 necessarily clear within this (KIF02). In the Netherlands (i.e. *Katenapaak*), participants  
37 reported most success developing a crucial role for communities within combined prevention  
38 and protection responses (KIF05). UK approaches were criticised for failing to effectively link  
39 protection and prevention agendas and involve communities: *“...efforts to reduce FGM have*  
40 *focused on punitive legislation without at the same time empowering women in communities*  
41 *to engage in debate, change attitudes and create alternative ways of affirming their cultural*  
42 *identity”*[14]. However, describing a successful Police-led community conference, a UK  
43 participant suggested that this was shifting, with many organisations *‘motivated by the need*  
44 *for change’* and prepared to support the police in developing *‘community-driven’* solutions  
45 (KIM12).  
46  
47  
48  
49  
50  
51  
52  
53

54 In discussing prosecutions, respondents highlighted the need for a person-centred *‘violence*  
55 *against women and girls’* approach that struck the correct balance between the needs of  
56  
57  
58

1  
2  
3 affected women and girls and the need to eradicate the practice of FGM (KIM12). One of the  
4 key barriers highlighted by respondents across different contexts was the likelihood that a  
5 survivor would need to testify against her relatives, and the difficult question of how to  
6 balance this against her best interests (KIF14, KIF13, KIM12, KIF06). Some suggested that  
7 the lack of trust both between professionals, and between professionals and potentially-  
8 affected communities, could hinder the investigations that could lead to prosecutions  
9 (KIM12). A lack of understanding and knowledge about FGM and potentially-affected  
10 communities among law enforcement officers was noted as another potential barrier to  
11 prosecutions (KIF02). Some respondents identified an important role for NGOs, some of  
12 which were established from within potentially-affected communities, in providing training to  
13 police and prosecutors, stating that their “*knowledge, advice, guidance and support has been*  
14 *absolutely instrumental*” (KIM12).  
15  
16  
17  
18  
19  
20  
21

22 *Effective protection:* Participants highlighted community involvement in protection  
23 interventions in the Netherlands, UK, and Spain. UK participants noted statutory agencies  
24 involving community organisations at an earlier stage when girls were identified as at risk of  
25 FGM (KIF17, KIF18). For example, FORWARD in London and NEw STep for African  
26 Community (NESTAC) in Manchester worked alongside authorities to deliver family  
27 education sessions, overcoming language and cultural barriers to strengthen engagement  
28 (KIF18). In Bristol, social services increased the capacity of community organisations to take  
29 on ‘safeguarding’ roles, working together to ensure common understandings of risk (KIF18).  
30  
31  
32  
33  
34

35 However, some participants expressed reservations about communities’ role in protection  
36 interventions, suggesting that statutory agencies passing on risk management responsibility  
37 to community organisations was risky (EG1; KIF18). Another noted that community  
38 organisations with experience of case management, e.g. around violence against women or  
39 asylum-seekers, could better manage the complexities of taking on a protection role[27]. A  
40 participant described the value of joint-working, in building community confidence to report  
41 concerns.  
42  
43  
44  
45

46 *“If there is a cutter in the community, the chances are higher that the community*  
47 *members would be aware of it than a professional...we need to work with*  
48 *communities to train them and empower them...so they can report for themselves.”*  
49  
50 (KIF17)  
51  
52

53 Other examples included developing tools to support protection of individual women and  
54 girls. The Dutch Government produced a passport-sized declaration, signed by a range of  
55 community and non-community organisations, stating that FGM is forbidden and punishable  
56  
57  
58  
59  
60

1  
2  
3 by a prison sentence and loss of rights to residency, which families can carry when travelling  
4 overseas (KIF05). A Spanish region produced a similar official letter for families travelling  
5 abroad (KIF01). Participants highlighted the need for such tools to be developed in  
6 partnership with communities, as in the Netherlands. UK participants noted that when a  
7 similar tool was developed by the UK Government, communities did not feel ownership of it,  
8 lessening its impact (KIF15).  
9  
10  
11

### 12 13 *Provision*

14 The role of potentially-affected communities in services provision is described under two sub-  
15 themes: (i) provision roles and (ii) facilitating access.  
16  
17

18  
19 *Provision roles:* Participants identified community organisations across Europe providing  
20 services from advocacy to psychological support, e.g. Daughters of Eve, FORWARD, FSAN,  
21 and GAMS - the *Groupe pour l'Abolition des Mutilations Sexuelles* (KIF03; KIF06, KIF15;  
22 KIF17). Fewer examples existed of community organisations influencing the planning, design  
23 or delivery of services, although participants concurred on the need for this (KIF17; KIF15;  
24 KIF18).  
25  
26  
27

28 *"If communities are involved they can tell what kind of services they require, rather*  
29 *than...you know coming from top down, where they make assumptions."* (KIF17)  
30  
31

32 *Facilitating access:* Although community organisations seldom delivered clinical services,  
33 they had an important role in facilitating women's engagement *"to understand why that*  
34 *service exists and... taking the time to explain it ...which is something that many health*  
35 *providers don't have the time to do"* (KIF17). UK participants described community  
36 involvement in developing and delivering specialist services (KIF15; KIF18). For example, an  
37 FGM clinic in Bristol was developed in response to lobbying from women who were involved  
38 in its design and sat on its steering group (KIF18). A London project, developed to support  
39 women failing to attend specialist appointments at an FGM clinic, involved community  
40 members calling/meeting clients to explain appointments, which improved services uptake  
41 (KIF18).  
42  
43  
44  
45  
46  
47

48  
49 In response to such barriers as a reluctance to disclose FGM to health professionals (KIF05),  
50 a fear of being criminalised (KIF17), or a lack of trust (KIF18), compounded by health  
51 providers' own discomfort and reluctance to initiate discussions around FGM[31], community  
52 organisations and members were regarded as having a key role in facilitating access to  
53 services. Participants identified an example of a service employing outreach workers from  
54 the community who take on a '*mediating role*' (KIF18). In another example, the Dutch  
55  
56  
57  
58  
59  
60

1  
2  
3 Government funded a community organisation to implement an awareness raising campaign  
4 to get information to women about services available to them (KIF05). Another participant  
5 described a more informal role.  
6

7 *"I often get people phoning me asking for advice and support... A lot of women would*  
8 *say that they don't want to ask someone outside [...] So we need... a way... to give*  
9 *confidence to women to be able to speak to their GP or health visitor about their fear of*  
10 *FGM without feeling criminalised."* (KIF17)  
11  
12  
13

14 Many participants highlighted the gap between communities and statutory agencies and the  
15 need for engagement models that facilitated improved trust, confidence, and access (KIF15;  
16 KIF15; KIF18; KIF17; KIF08).  
17  
18  
19

### 20 *Participation*

21 The role of potentially-affected communities in participation interventions is described under  
22 four sub-themes: (i) communities' vital role, (ii) engagement and representativeness, (iii)  
23 involvement in campaigns, and (iv) the value of a clear and inclusive national strategy.  
24  
25  
26  
27

28 *Vital role:* Literature and interview sources highlighted that empowering affected communities  
29 was the only way to end FGM[7, 12, 13, 25]. All participants emphasised the key role of  
30 potentially-affected communities, indicating it was vital to ensure interventions were informed  
31 by the experiences, needs and views of those affected by FGM.  
32  
33

34 *'Anything around FGM needs to be championed and developed with people affected at*  
35 *the centre and leading the work.'* (CG1)  
36  
37

38 Supporting and enabling community organisations to participate in policy-making was  
39 identified as essential.  
40

41 *'Finding ways and mechanisms to give [community organisations] that capacity, the*  
42 *framework and leverage for them to be heard [is] very important because I don't*  
43 *believe we can effectively abandon FGM in Europe [...] if those communities are not*  
44 *the ones...acting for the abandonment of FGM. It's a very important role and only they*  
45 *can actually do it.'* (KIF10)  
46  
47  
48  
49

50 *Engagement and representativeness:* Despite consensus on its value, most participants said  
51 insufficient efforts were made by policy-makers and practitioners to engage with communities  
52 (KIF06; KIF01; KIF07; KIF17; KIF18). This was particularly evident in the UK, with existing  
53 approaches described as *'piecemeal'* (KIF15) and *'tokenistic'* (KIF17; KIF18). Community  
54 participants cited examples of being excluded or included at the last minute to *'tick a box'*  
55  
56  
57  
58  
59

1  
2  
3 (KIF17) or when statutory professionals had a crisis (KIF18). In contrast, engagement in the  
4 Netherlands was described as 'active' (KIF05; KIF18).

5  
6 *'I don't think there's any such thing as a hard-to-reach group. I think there's*  
7 *something called 'failed-to-reach groups by the statutory agencies' because there'll*  
8 *always be individuals or an organisation who'll get you access to affected*  
9 *communities.'* (KIM12)  
10  
11

12  
13 Participants noted a tendency of UK decision-makers to engage with the same handful of  
14 individuals as 'leaders' or 'spokespeople' (KIF18). One highlighted the difference between  
15 enabling individual community members to participate and working with community  
16 organisations.  
17

18  
19 *"[Community organisations] are bringing more than just their personal opinion, they*  
20 *tend... to be engaging more widely with the community and so can be a channel to*  
21 *have these voices heard."* (KIF18)  
22  
23

24  
25 Representativeness appeared to be a particular challenge for countries newer to FGM issues  
26 (e.g. Portugal) as community organisations might not yet exist around this issue or have  
27 confidence and advocacy experience (KIF18). Thus, whether effective or 'active' participation  
28 was achieved appeared to vary between - and sometimes within – countries, potentially  
29 depending on whether decision-makers valued community organisations.  
30

31  
32 *"It depends... whether the local authority [...] values community interventions and*  
33 *whether they see the community as a problem and... statutory professionals as the*  
34 *answer...or whether [the local authority] views the community as part and parcel of*  
35 *[...] the solution."* (KIF18)  
36  
37  
38

39  
40 UK participants noted that most FGM work occurred in silos, further challenging effective  
41 participation. Interventions focused solely on FGM failed to account for '*gendered social*  
42 *norms... and nature of women's lives'* (KIF15)[32]. Participants indicated that separating  
43 FGM from issues like domestic violence was a major problem.  
44

45  
46 *"They are seen as completely separate topics or discrete topics as opposed to how*  
47 *do these principles cut across the way we navigate our communities and navigate our*  
48 *spaces."* (KIF18)  
49  
50

51  
52 *Campaigns:* Several participants said that communities played an important role in  
53 campaigning and awareness-raising. The Europe-wide End FGM Campaign led by Amnesty  
54 International Ireland and the lobbying work of GAMS, a large French NGO founded in 1982  
55 by women of African and Western origin, were highlighted (KIF02). Others spoke of the  
56  
57  
58

1  
2  
3 important work of high profile survivor-campaigners, such as Layla Hussein in the UK  
4 (KIF07). One participant talked about her own role as a community campaigner in '*raising*  
5 *awareness through fashion...music and culture nights*' and '*campaigning, lobbying and*  
6 *working with the government*' (KIF07).  
7  
8  
9

10 *Strategy*: Several participants noted that addressing FGM required strong strategic  
11 frameworks. Most suggested this should be a resourced, standalone, multi-agency, national  
12 action plan, developed in partnership with key stakeholders, including affected communities:

13  
14 *"Authorities should... design a plan of action on FGM and...attach a budget to it and [it]*  
15 *should not only be developed by officials in their offices but in collaboration with the*  
16 *communities themselves and with all stakeholders."* (KIF06)  
17  
18  
19

20 At least eight European countries had developed national FGM action plans by 2013[1] and  
21 Scotland did so in 2016[33]. There were very few examples across Europe of communities  
22 having a role in strategy development or being supported to influence policy and practice.  
23 The Finnish National Action Plan provided an example of community engagement, as it was  
24 developed by a working group of government ministries and African women's  
25 organisations[1]. Scotland's national action plan incorporated clear actions on community  
26 participation, but participants noted limited engagement with communities in its development  
27 (KIF17) and a general absence of community voices in the policy arena in Scotland (CG1;  
28 CG2; KIF17). Participants in several European countries noted disconnects between policy  
29 and reality.  
30  
31  
32  
33  
34

35 *"One thing we're missing which is the reality for many European countries, is the*  
36 *grassroots... There's a lot of awareness and there's a lot of policy but somehow we*  
37 *don't understand what's happening at the grass roots."* (KIF07)  
38  
39  
40

### 41 ***Barriers to community participation***

42 The main barriers identified to effective work with communities were: (i) cultural, i.e. within  
43 communities; (ii) structural, i.e. external to communities; and (iii) sustainability-related.  
44  
45  
46

47 *Cultural*: Leadership of FGM work is not easy and participants described the importance of  
48 supporting community-members taking on such roles, e.g. through training, information, and  
49 access to services (KIF05; KIF13; KIF13). Negative consequences for community leaders or  
50 activists have been documented[34], including verbal abuse, criticism, threats, and family  
51 conflict (KIF05; KIF04; KIF17).  
52  
53

54 *"I've had people from my community who have sent me...hate messages, saying...*  
55 *what you're doing is wrong. And I've had family-members who have said that they*  
56  
57  
58

1  
2  
3 *will no longer speak to me... and that I... bring shame on them. It's not... easy for me*  
4 *to take on this role. Trust me, there were times when I almost gave up" (KIF17)*  
5  
6

7 Women may worry about bringing shame on their communities or experience shame or guilt  
8 if they speak about FGM to service providers or other 'outsiders' (KIF17; KIF16)[35],  
9 particularly as some communities are explicitly told not to speak about FGM (KIF17). Trust-  
10 related barriers were thus common between communities and professionals (KIF07; KIF04),  
11 particularly within child protection (KIF18) or health services, where usage of interpreters  
12 could compound trust issues (KIF16; KIF17). Taking time to build trust was therefore deemed  
13 important  
14

15  
16  
17 *'It's not a case of turning up with knowledge, but of starting off with the knowledge of*  
18 *communities themselves, then building something together' (KIF02)*  
19  
20  
21

22 Gender norms and power dynamics within potentially-affected communities were identified  
23 as potential barriers, with several participants highlighting the importance of working with  
24 men and women separately before bringing them together if appropriate (KIF04; KIF07).  
25 While gender oppression was a structural barrier experienced by women globally, "*its*  
26 *manifestation differs according to culture, country and social grouping*"[29], thus affecting  
27 which avenues were open to women to challenge or engage with FGM and other aspects of  
28 their lives[32, 36].  
29  
30  
31  
32  
33

34 *Structural:* Lack of understanding among professionals of the value and potential role of  
35 communities was highlighted as a key barrier to their involvement in interventions. Key  
36 decision-makers and service providers would need to change the ways in which they work to  
37 ensure that communities were actively involved and heard. One participant provided an  
38 example of statutory professionals in Bristol who developed alternative ways of engaging  
39 with communities including attending community events, holding informal consultations, and  
40 making meetings and meeting space more equitable and community friendly (KIF18). Lack of  
41 compensation for travel and childcare expenses was cited as a barrier by several  
42 participants, including a lack of understanding by some professionals of why such expenses  
43 would even be required (KIF06; KIF17; KIF18).  
44  
45  
46  
47  
48

49 *'It still feels like there is a need to explain the added value of communities to the*  
50 *powers that be.'* (KIF18)  
51  
52

53 *Sustainability:* Participants in different contexts raised concerns about the sustainability of  
54 FGM interventions, particularly those at community level that required long-term investment.  
55 Some indicated that although community-led organisations were often approached for their  
56  
57  
58

1  
2  
3 expertise, they were rarely funded for this advisory role (KIF15) and that significant  
4 government funding was needed (KIF06; KIF15). Others highlighted the need for longer-term  
5 investment in implementation and action beyond developing protocols, frame-works, and  
6 action plans (KIF15; KIF03). Several noted that much of the work of community organisations  
7 was not financially valued, with one participant stressing how important it was to recognise  
8 the challenging nature of this work, which is '*under-valued and under-resourced*', and  
9 questioning how long community members could continue to volunteer in such challenging  
10 roles (KIF15).  
11  
12  
13  
14  
15

## 16 **Discussion**

### 17 *Principle findings*

18  
19 Clear consensus emerged that potentially-affected communities should have a role in all  
20 intervention areas and that this was vital to addressing FGM in Europe[1, 15, 27]. Despite  
21 this consensus and several examples of good practice (e.g. EU-funded REPLACE and  
22 REPLACE 2 programmes, Dutch *Ketenaapak*, the Tackling FGM Initiative), community roles  
23 remained inconsistent in FGM interventions and often non-existent in FGM policy  
24 development.  
25  
26  
27  
28

29  
30 Practices ranged from good examples of support for community-led interventions and  
31 partnership work with communities to less positive examples of tokenism and non-  
32 participation. Most FGM interventions across Europe focused on awareness-raising, and  
33 despite examples of good practice noted above, community participation appeared fairly  
34 minimal[1, 15]. The extent of community participation was inconsistent between and within  
35 countries. While community participation was accepted as vital, participants noted that  
36 practices associated with community participation varied enormously. This corresponded  
37 with the significant literature highlighting challenges inherent in increasing community  
38 participation, e.g. what level of participation[37, 38], '*who participates, in what, and for whose*  
39 *benefit*[39], and to what extent government organisations that engage with communities  
40 could change to develop truly participatory processes and spaces[40].  
41  
42  
43  
44  
45  
46

47  
48 The role of communities appeared most developed within prevention interventions, with good  
49 practice examples of both community-led initiatives and partnership. Protection-focused  
50 approaches were more challenging in terms of participation, as the clear child-protection  
51 focus could stigmatise families[1, 7]. Community participation within safeguarding varied,  
52 with examples of both effective and emerging roles. Individuals and organisations had roles  
53 in building trust and bridging gaps between communities and authorities, though  
54 responsibility for managing risk should remain firmly with statutory bodies[27]. While several  
55  
56  
57  
58  
59  
60

1  
2  
3 community-led organisations delivered a range of services, few examples were found of  
4 communities participating in designing, delivering or evaluating statutory services. Good  
5 practice examples were identified of community organisations or activists playing a key role  
6 in facilitating services access and enabling dialogue within communities to occur[27].  
7  
8  
9

### 10 *Implications for policy and practice*

11 Engaging potentially-affected communities in coordinated multi-agency responses appears  
12 critical to the success of FGM policies and interventions in Europe. Decision-makers and  
13 service providers should invest in community engagement by (i) ensuring that community  
14 organisations can participate actively in future interventions and (ii) addressing cultural,  
15 structural, and sustainability-related barriers to participation.  
16  
17  
18

19  
20 Supporting and strengthening community organisations can improve engagement. Bottom-up  
21 approaches that enable dialogue within communities appear most successful. Community  
22 development support could enable potentially-affected communities to identify their own  
23 FGM-related concerns and aspirations and work collectively to identify solutions and take  
24 action. This requires long-term investment in community development support and  
25 community organisations themselves, to support community-led interventions and  
26 meaningful engagement between communities and policy-makers. Any engagement with  
27 communities must begin with identifying those communities potentially affected,  
28 acknowledging that communities are not homogenous, and engaging with a wide range of  
29 groups and community representatives across nationalities and ethnicities. As most women  
30 and girls affected by FGM also identify as people of colour, perspectives and lived  
31 experiences must be included in development of meaningful policies and services.  
32  
33  
34  
35  
36  
37  
38  
39

40 Research on FGM interventions across Europe is limited, when compared to levels of  
41 activism. Research has focused on clinical care, provision of health services, and attitudes  
42 towards FGM. Minimal investigation has been conducted on the role of diaspora  
43 communities and their contributions to challenging and responding to FGM. Empowerment,  
44 engagement, and participation are frequently mentioned, but rarely critically examined, with  
45 little discussion about how to move beyond rhetoric towards putting these concepts into  
46 practice. Further research with communities, including participatory methods, appears  
47 warranted. Any such research should include the voices of affected women and girls, as  
48 those best able to describe their lived experiences and needs and to contribute to the  
49 additionally sensitive topics of prosecution and redress.  
50  
51  
52  
53  
54  
55

### 56 *Limitations*

1  
2  
3 This study had three significant limitations. First, this study was exploratory and participant  
4 numbers were limited due to time and resource constraints. Second, numbers of participants  
5 from potentially-affected communities were limited. While the sensitive nature of FGM may  
6 have influenced the engagement of these participants, those we approached had experience  
7 of speaking about women's issues and engaging with researchers and policy-makers. Thus,  
8 numbers were primarily due to the small-scale and exploratory nature of the research and  
9 the lack of time and resources to conduct more extensive community engagement. Further  
10 community engagement is needed to expand on issues raised. Finally, focus on European  
11 interventions ignored the successfully designed and implemented African interventions, e.g.  
12 TOSTAN ([www.tostan.org](http://www.tostan.org)) that offer international benchmarks for changing attitudes and  
13 reducing FGM[21].  
14  
15  
16  
17  
18

## 19 20 21 **Conclusion**

22 Exploring the role of communities within interventions to address FGM in Europe allowed  
23 critical examination of how crucial community voices remain marginalised and could be  
24 better heard and supported. "*Without an effective commitment to the participation and*  
25 *empowerment of potentially-affected communities, policy-makers and practitioners will not*  
26 *identify the actual risks experienced by diaspora girls and women in Europe or develop*  
27 *effective interventions, and risk further marginalising those community voices that are the*  
28 *most effective advocates for change*"[6]. Results demonstrate that it is possible to work  
29 alongside potentially-affected communities, benefitting from community perspectives and  
30 expertise, to develop meaningful partnerships and support community-led interventions.  
31  
32  
33  
34  
35  
36

## 37 **Declarations**

### 38 *Conflict of interest*

39 None declared.  
40  
41

### 42 *Author contributions*

43 EC contributed to study design, data collection and analysis and drafted the manuscript. NM  
44 contributed to study design, data analysis, and manuscript writing. HB contributed to study  
45 design, data collection and analysis, and critically reviewed the manuscript. NH contributed  
46 to study design and data interpretation and critically revised the manuscript. All authors  
47 approved the version for submission.  
48  
49  
50  
51  
52

### 53 *Acknowledgements*

54 Special thanks to all key informants, particularly women from potentially-affected  
55 communities, for their invaluable insights.  
56  
57  
58

### Funding

This work was supported by the Scottish Government Equality Fund and Rosa FGM Small Grants Programme for funding research.

### Data sharing

Anonymised dataset and coding are available on request in accordance with LSHTM institutional data management policy.

### References

1. EIGE, *Female genital mutilation in European Union and Croatia*. 2013, Belgium: European Institute for Gender Equality.
2. Kaplan, A., et al., *Female genital mutilation/cutting in The Gambia: long-term health consequences and complications during delivery and for the newborn*. *Int J Womens Health*, 2013. **5**: p. 323-31.
3. Kaplan, A., et al., *Health consequences of female genital mutilation/cutting in the Gambia, evidence into action*. *Reprod Health*, 2011. **8**: p. 26.
4. Leye, E., et al., *Towards a better estimation of prevalence of female genital mutilation in European Union: interpreting existing evidence in all EU Member States*. *Genus*, 2014. **LXX**(1): p. 99-121.
5. UNICEF, *Female Genital Mutilation/Cutting: A Statistical overview and exploration of the dynamics of change*. 2013, New York: UNICEF.
6. Baillot, H., et al., *Tackling Female Genital Mutilation in Scotland: A Scottish model of intervention* 2014, Scottish Refugee Committee; LSHTM: Glasgow.
7. Gele, A.A., E.B. Johansen, and J. Sundby, *When female circumcision comes to the West: attitudes toward the practice among Somali Immigrants in Oslo*. *BMC Public Health*, 2012. **12**: p. 697.
8. Hemmings, J., *The FGM Initiative: interim report*. 2011, Options UK, Esmee Fairbairn Foundation, Rosa, Trust for London: London.
9. Shaw, M., *Community Work Today: Competing Demands in Practice*. Concept, 2013. **4**(2).
10. CDNOS, *Community Development National Occupational Standards*. 2015: London.
11. Berg, R.C. and E. Denison, *A tradition in transition: factors perpetuating and hindering the continuance of female genital mutilation/cutting (FGM/C) summarized in a systematic review*. *Health Care Women Int*, 2013. **34**(10): p. 837-59.
12. Costello, S., et al., *In the Best Interests of the Child: Preventing Female Genital Cutting (FGC)*. *British Journal of Social Work*, 2013: p. 1–18.
13. Isman, E., C. Ekeus, and V. Berggren, *Perceptions and experiences of female genital mutilation after immigration to Sweden: an explorative study*. *Sex Reprod Healthc*, 2013. **4**(3): p. 93-8.
14. Dustin, M., *Female Genital Mutilation/Cutting in the UK: Challenging the Inconsistencies*. *European Journal of Women's Studies*, 2010. **17**(7).
15. Brown, K., D. Beecham, and H. Barrett, *The Applicability of Behaviour Change in Intervention Programmes Targeted at Ending Female Genital Mutilation in the EU: Integrating Social Cognitive and Community Level Approaches*. *Obstet Gynecol Int*, 2013. **2013**: p. 324362.
16. Norman, K., et al., *FGM is always with us. Experiences, Perceptions and Beliefs of Women Affected by Female Genital Mutilation in London: Results from a PEER Study*. 2009, Options Consultancy Services and FORWARD: London.

17. Johnsdotter, S., *The Impact of Migration on Attitudes to Female Genital Cutting and Experiences of Sexual Dysfunction Among Migrant Women with FGC*. *Curr Sex Health Rep*, 2018. **10**(1): p. 18-24.
18. Johnsdotter, S., et al., "Never my daughters": a qualitative study regarding attitude change toward female genital cutting among Ethiopian and Eritrean families in Sweden. *Health Care Women Int*, 2009. **30**(1-2): p. 114-33.
19. Scottish Government, *Safer Lives: Changed Lives: A Shared Approach to Tackling Violence Against Women in Scotland*. 2009, Edinburgh: COSLA.
20. Council of Europe, *Convention on preventing and combatting violence against women and domestic violence*. 2011: <http://www.refworld.org/docid/4ddb74f72.html>.
21. Baillot, H., et al., *Addressing female genital mutilation in Europe: a scoping review of approaches to participation, prevention, protection, and provision of services*. *Int J Equity Health*, 2018. **17**(1): p. 21.
22. Saunders, B., et al., *Saturation in qualitative research: exploring its conceptualization and operationalization*. *Qual Quant*, 2017. <https://doi.org/10.1007/s11135-017-0574-8>.
23. Braun, V. and V. Clarke, *Using thematic analysis in psychology*. *Qualitative Research in Psychology*, 2006. **3**(2): p. 77-101.
24. Tong, A., P. Sainsbury, and J. Craig, *Consolidated criteria for reporting qualitative research (COREQ): a 32-item checklist for interviews and focus groups*. *Int J Qual Health Care*, 2007. **19**(6): p. 349-57.
25. Khaja, K., et al., *Female genital cutting: African women speak out*. *International Social Work*, 2009. **52**(5): p. 1-15.
26. Reig Alcaraz, M., J. Siles Gonzalez, and C. Solano Ruiz, *Attitudes towards female genital mutilation: an integrative review*. *Int Nurs Rev*, 2014. **61**(1): p. 25-34.
27. Khalifa, S. and E. Brown, *Communities Tackling FGM in the UK: Best Practice Guide*. 2016, the Tackling Female Genital Mutilation Initiative and Options Consultancy Services Ltd: London.
28. Brown, E. and C. Porter, *The Tackling FGM Initiative: Evaluation of the Second Phase (2013–2016)*. 2016, Options Consultancy Services Ltd, Trust for London, Esmee Fairbairn Foundation, Rosa, Comic Relief: London.
29. Dominelli, L., *Women in the community: feminist organising principles and organising in community work*. *Community Development Journal*, 1995. **30**(2): p. 133-143.
30. Berer, M., *The history and role of the criminal law in anti-FGM campaigns: Is the criminal law what is needed, at least in countries like Great Britain?* *Reprod Health Matters*, 2015. **23**(46): p. 145-57.
31. Abdulcadir, J., et al., *Missed opportunities for diagnosis of female genital mutilation*. *Int J Gynaecol Obstet*, 2014. **125**(3): p. 256-60.
32. Chai, X., et al., *Married women's negotiation for safer sexual intercourse in Kenya: Does experience of female genital mutilation matter?* *Sex Reprod Healthc*, 2017. **14**: p. 79-84.
33. Scottish Government, *Scotland's National Action Plan to Prevent and Eradicate female genital mutilation (FGM) 2016-2020*. 2016, COSLA: [www.gov.scot/Resource/0049/00493752.pdf](http://www.gov.scot/Resource/0049/00493752.pdf).
34. Behrendt, A., *Listening to African Voices. Female Genital Mutilation/Cutting among Immigrants in Hamburg: Knowledge, Attitudes and Practice*. 2011, Plan International Deutschland e.V: Hambourg.
35. Vloeberghs, E., et al., *Coping and chronic psychosocial consequences of female genital mutilation in The Netherlands*. *Ethn Health*, 2012. **17**(6): p. 677-95.
36. Mpofu, S., et al., *The relation of female circumcision to sexual behavior in Kenya and Nigeria*. *Women Health*, 2017. **57**(7): p. 757-774.
37. Arnstein, S.R., *A Ladder Of Citizen Participation*. *Journal of the American Institute of Planners*, 1969. **35**(4): p. 216-224.
38. Cornwall, A., *Unpacking 'Participation': models, meanings and practices*. *Community Development Journal* 2008. **43**(1): p. 269–283.

- 1  
2  
3 39. Cornwall, A. and A. Rivas, *From 'gender equality and 'women's empowerment' to*  
4 *global justice: reclaiming a transformative agenda for gender and development*. Third  
5 World Quarterly, 2015. **36**(2): p. 396-415.  
6 40. Eversole, R., *Remaking Participation: challenges for community development*  
7 *practice*. Community Development Journal, 2012. **47**(1): p. 29-41.  
8 41. UNICEF, *Female Genital Mutilation/Cutting: A Global Concern*. 2016, UNICEF:  
9 [https://www.unicef.org/media/files/FGMC\\_2016\\_brochure\\_final\\_UNICEF\\_SPREAD.p](https://www.unicef.org/media/files/FGMC_2016_brochure_final_UNICEF_SPREAD.pdf)  
10 [df](https://www.unicef.org/media/files/FGMC_2016_brochure_final_UNICEF_SPREAD.pdf).  
11  
12  
13  
14  
15  
16  
17  
18  
19  
20  
21  
22  
23  
24  
25  
26  
27  
28  
29  
30  
31  
32  
33  
34  
35  
36  
37  
38  
39  
40  
41  
42  
43  
44  
45  
46  
47  
48  
49  
50  
51  
52  
53  
54  
55  
56  
57  
58  
59  
60

## Tables

### Table 1. Key definitions

|                                |                                                                                                                                                                                                                                                                                                                                                                                                                                                                                                                                                                                                                                                                             |
|--------------------------------|-----------------------------------------------------------------------------------------------------------------------------------------------------------------------------------------------------------------------------------------------------------------------------------------------------------------------------------------------------------------------------------------------------------------------------------------------------------------------------------------------------------------------------------------------------------------------------------------------------------------------------------------------------------------------------|
| Female genital mutilation      | All procedures that involve partial or total removal of the female external genitalia, or other injury to the female genital organs for non-medical reasons (WHO, 2016)                                                                                                                                                                                                                                                                                                                                                                                                                                                                                                     |
| Community                      | A community of identity has a common bond based on ' <i>geography, identity or interest</i> ' [10]                                                                                                                                                                                                                                                                                                                                                                                                                                                                                                                                                                          |
| Community development          | Community development enables people to work collectively to bring about positive social change. This long-term process starts from people's own experience and enables communities to work together to: <ul style="list-style-type: none"> <li>• identify their own needs and actions;</li> <li>• take collective action using their strengths and resources;</li> <li>• develop their confidence, skills and knowledge;</li> <li>• challenge unequal power relationships;</li> <li>• promote social justice, equality and inclusion;</li> </ul> to improve the quality of their own lives, the communities in which they live and societies of which they are a part [10] |
| Participation                  | Policy-making and practice development around violence against women is shaped by the experiences, needs and views of those affected by FGM [6]                                                                                                                                                                                                                                                                                                                                                                                                                                                                                                                             |
| Potentially-affected community | A diaspora community from one of 29 countries identified by UNICEF, in which FGM practices are concentrated, i.e. Somalia 98%, Guinea 96%, Djibouti 93%, Egypt 91%, Eritrea 89%, Mali 89%, Sierra Leone 88%, Sudan 88%, Gambia 76%, Burkina Faso 76%, Ethiopia 74%, Mauritania 69%, Liberia 66%, Guinea-Bissau 50%, Chad 44%, Cote d'Ivoire 38%, Kenya 27%, Nigeria 27%, Senegal 26%, CAR 24%, Yemen 23%, Tanzania 15%, Benin 13%, Iraq 8%, Ghana 4%, Togo 4%, Niger 2%, Cameroon 1%, Uganda 1% [5, 41]                                                                                                                                                                     |
| Prevention                     | Interventions intended to create and/or sustain behavioural and attitudinal change within affected communities [6]                                                                                                                                                                                                                                                                                                                                                                                                                                                                                                                                                          |
| Protection                     | Interventions intended to protect the individual rights of women and girls who are at risk of or have experienced FGM [6]                                                                                                                                                                                                                                                                                                                                                                                                                                                                                                                                                   |
| Service provision              | Service responses to survivors of FGM [6]                                                                                                                                                                                                                                                                                                                                                                                                                                                                                                                                                                                                                                   |

**Table 2. Participant characteristics**

| <b>ID</b> | <b>Role/Title</b>                         | <b>Location</b> | <b>Interview type</b> |
|-----------|-------------------------------------------|-----------------|-----------------------|
| KIF01     | University professor                      | Spain (Skype)   | KII                   |
| KIF02     | NGO worker                                | France          | KII                   |
| KIF03     | NGO worker                                | Netherlands     | KII                   |
| KIF04     | Teacher                                   | England         | KII                   |
| KIF05     | Government minister                       | Netherlands     | KII                   |
| KIF06     | University professor                      | Belgium         | KII                   |
| KIF07     | Community activist                        | Ireland (Skype) | KII                   |
| KIF08     | Medical professional                      | England         | KII                   |
| KIF09     | University professor                      | France          | KII                   |
| KIF10     | INGO worker                               | EU              | KII                   |
| KIF11     | Solicitor                                 | Scotland        | KII                   |
| KIM12     | Police officer                            | England         | KII                   |
| KIF13     | Police officer                            | England         | KII                   |
| KIF14     | Legal professional                        | France          | KII (unrecorded)      |
| KIF15     | NGO worker                                | England         | KII                   |
| KIF16     | Medical professional                      | Scotland        | KII                   |
| KIF17     | Community activist                        | Scotland        | KII                   |
| KIF18     | Community activist                        | Scotland        | KII                   |
| EG1       | 9 policy/practice participants            | Scotland        | Group interview       |
| EG2       | 9 policy/practice/community participants  | Scotland        | Group interview       |
| EG3       | 10 policy/practice/community participants | Scotland        | Group interview       |
| CG1       | 4 community activists                     | Scotland        | Group interview       |
| CG2       | 4 community activists                     | Scotland        | Group interview       |

## Consolidated criteria for reporting qualitative studies (COREQ): 32-item checklist

Developed from: Tong A, Sainsbury P, Craig J. Consolidated criteria for reporting qualitative research (COREQ): a 32-item checklist for interviews and focus groups. *International Journal for Quality in Health Care*. 2007. Volume 19, Number 6: pp. 349 – 357

**YOU MUST PROVIDE A RESPONSE FOR ALL ITEMS. ENTER NA IF NOT APPLICABLE**

| Item                                           | Guide questions/description                                                                                                                                | Response or reporting page                |
|------------------------------------------------|------------------------------------------------------------------------------------------------------------------------------------------------------------|-------------------------------------------|
| <b>Domain 1: Research team and reflexivity</b> |                                                                                                                                                            |                                           |
| <i>Personal Characteristics</i>                |                                                                                                                                                            |                                           |
| 1. Interviewer/facilitator                     | Which author/s conducted the interview or focus group?                                                                                                     | (p 5)                                     |
| 2. Credentials                                 | What were the researcher's credentials (e.g. PhD, MD)?                                                                                                     | MSc, DrPH                                 |
| 3. Occupation                                  | What was their occupation at the time of the study?                                                                                                        | (p 1)                                     |
| 4. Gender                                      | Was the researcher male or female?                                                                                                                         | Female                                    |
| 5. Experience and training                     | What experience or training did the researcher have?                                                                                                       | MSc-level social science research methods |
| <i>Relationship with participants</i>          |                                                                                                                                                            |                                           |
| 6. Relationship established                    | Was a relationship established prior to study commencement?                                                                                                | (p 4)                                     |
| 7. Participant knowledge of the interviewer    | What did the participants know about the researcher? e.g. personal goals, reasons for doing the research                                                   | (p 5)                                     |
| 8. Interviewer characteristics                 | What characteristics were reported about the interviewer/facilitator (e.g. bias, assumptions, reasons and interests in the research topic)?                | (p 5)                                     |
| <b>Domain 2: study design</b>                  |                                                                                                                                                            |                                           |
| <i>Theoretical framework</i>                   |                                                                                                                                                            |                                           |
| 9. Methodological orientation and Theory       | What methodological orientation was stated to underpin the study (e.g. grounded theory, discourse analysis, ethnography, phenomenology, content analysis)? | (p 5)                                     |
| <i>Participant selection</i>                   |                                                                                                                                                            |                                           |
| 10. Sampling                                   | How were participants selected (e.g. purposive, convenience, consecutive, snowball)?                                                                       | (p 4)                                     |
| 11. Method of approach                         | How participants were approached (e.g. face-to-face, telephone, mail, email)?                                                                              | (p 4)                                     |
| 12. Sample size                                | How many participants were in the study?                                                                                                                   | (pp 4-5)                                  |
| 13. Non-participation                          | How many people refused to participate or dropped out? Reasons?                                                                                            | (pp 4-5)                                  |
| <i>Setting</i>                                 |                                                                                                                                                            |                                           |
| 14. Setting of data collection                 | Where data were collected (e.g. home, clinic, workplace)?                                                                                                  | (p 5)                                     |
| 15. Presence of non-participants               | Was anyone else present besides the participants and researchers?                                                                                          | (p 5)                                     |
| 16. Description of sample                      | What are the important characteristics of the sample (e.g. demographic data, date)?                                                                        | (p 4; p 23)                               |
| <i>Data collection</i>                         |                                                                                                                                                            |                                           |
| 17. Interview guide                            | Were questions, prompts, guides provided by the authors? Was it pilot tested?                                                                              | (p 5)                                     |
| 18. Repeat interviews                          | Were repeat interviews carried out? If yes, how many?                                                                                                      | NA                                        |
| 19. Audio/visual recording                     | Did the research use audio or visual recording to collect data?                                                                                            | (p 5)                                     |

|                                        |                                                                                                                                  |           |
|----------------------------------------|----------------------------------------------------------------------------------------------------------------------------------|-----------|
| 20. Field notes                        | Were field notes made during and/or after the interview or focus group?                                                          | (p 5)     |
| 21. Duration                           | What was the duration of the interviews or focus group?                                                                          | (p 5)     |
| 22. Data saturation                    | Was data saturation discussed?                                                                                                   | (p 5)     |
| 23. Transcripts returned               | Were transcripts returned to participants for comment and/or correction?                                                         | NA        |
| <b>Domain 3: analysis and findings</b> |                                                                                                                                  |           |
| <i>Data analysis</i>                   |                                                                                                                                  |           |
| 24. Number of data coders              | How many data coders coded the data?                                                                                             | (p 5)     |
| 25. Description of the coding tree     | Did authors provide a description of the coding tree?                                                                            | (p 5)     |
| 26. Derivation of themes               | Were themes identified in advance or derived from the data?                                                                      | (p 5)     |
| 27. Software                           | What software, if applicable, was used to manage data?                                                                           | (p 5)     |
| 28. Participant checking               | Did participants provide feedback on the findings?                                                                               | (p 5)     |
| <i>Reporting</i>                       |                                                                                                                                  |           |
| 29. Quotations presented               | Were participant quotations presented to illustrate the themes/findings? Was each quotation identified, e.g. participant number? | (pp 6-17) |
| 30. Data and findings consistent       | Was there consistency between the data presented and the findings?                                                               | Yes       |
| 31. Clarity of major themes            | Were major themes clearly presented in findings?                                                                                 | Yes       |
| 32. Clarity of minor themes            | Is there a description of diverse cases or discussion of minor themes?                                                           | Yes       |

Once you have completed this checklist, please save a copy and upload it as part of your submission.
